# Supplementary material for: Transcriptome analysis of normal-appearing white matter reveals cortisol- and disease-associated gene expression profiles in multiple sclerosis
Source: Acta Neuropathol Commun. 2019 Apr 25;7:60. doi: 10.1186/s40478-019-0705-7 (PMC6485096; doi:10.1186/s40478-019-0705-7)
Supplement: Supplementary file 1 — GO analyses. (XLSX 15 kb) [file 40478_2019_705_MOESM1_ESM.xlsx]

## Sheet: Sheet1
Black module
GO class	Genes present
endomembrane system (GO:0012505)	CLCN3, RAB9A, XPO6, NUP160, FUT8, UNC50, SLC35A5, ALG6, PIGK, PIGM, NUP54, GOLGA5, HIP1, SEC61A2, ACER3, SPTLC1, SCD, PIGV, PIGU, ATP11B, LDLRAP1, PIGN, TNKS2, TMEM38B, SENP2, SH3BP4, CYP7B1, MAN2A1, LAMP2, MAGT1, NPC1, UACA, PSEN1, SQLE, UBXN4, SEC23B, SRP9
nuclear envelope-endoplasmic reticulum network (GO:0042175)	ACER3, SPTLC1, RAB9A, PIGV, PIGU, ALG6, TMEM38B, PIGN, CYP7B1, PIGK, MAGT1, PIGM, PSEN1, SQLE, SEC23B, SRP9, SEC61A2
endoplasmic reticulum membrane (GO:0005789)	ACER3, SPTLC1, RAB9A, PIGV, PIGU, ALG6, TMEM38B, PIGN, CYP7B1, PIGK, MAGT1, PIGM, SQLE, SEC23B, SRP9, SEC61A2
Axon guidance (Kegg pathway hsa04360)	SEMA6A, PTK2, UNC5B, PLXNB1, CFL2, SEMA3C, UNC5C, DPYSL2
Blue module
GO class	Genes present
sensory perception of chemical stimulus (GO:0007606)	OR5H1, TAS2R4, SLC6A3, OR11A1, CNGB1, OR6W1P, OR8U1, OR5A1, OR4C15, OR10G8, OR51B5, TAS2R9, OR7C2, OR6Y1, OR5F1, OR6N1, SCNN1D, OR10P1, OR51G1, OR1S2, OR4X2, OR3A3, OR52K2, OR8J1, OR5V1, OR4A15, P2RX3, OR8B8, OR6K2, OR8D2, OR51A7
sensory perception of smell (GO:0007608)	OR5H1, SLC6A3, OR11A1, CNGB1, OR6W1P, OR8U1, OR5A1, OR4C15, OR10G8, OR51B5, OR7C2, OR6Y1, OR5F1, OR6N1, OR10P1, OR51G1, OR1S2, OR4X2, OR3A3, OR52K2, OR8J1, OR5V1, OR4A15, OR8B8, OR6K2, OR8D2, OR51A7
olfactory receptor activity (GO:0004984)	OR5H1, OR11A1, OR6W1P, OR8U1, OR5A1, OR4C15, OR10G8, OR51B5, OR7C2, OR6Y1, OR5F1, OR6N1, OR10P1, OR51G1, OR1S2, OR4X2, OR3A3, OR52K2, OR8J1, OR5V1, OR4A15, OR8B8, OR6K2, OR8D2, OR51A7
cognition (GO:0050890)	OR5H1, TAS2R4, STRC, SLC6A3, RRH, OR11A1, CNGB1, CRYGA, OR4C15, TAS2R9, OR7C2, OR10P1, CLN3, CRYAA, OR51G1, OR1S2, OR52K2, OR8J1, OR5V1, OR8B8, OTOA, SEMA4A, TH, CABP4, OPN1SW, OR6W1P, OR8U1, CDH3, OR5A1, GJC3, OR10G8, HRH3, OR51B5, OR6Y1, OR5F1, OR6N1, SCNN1D, NYX, OPN1MW, PDE6G, NPVF, OR4X2, EYS, OR3A3, OR4A15, P2RX3, OR6K2, GRK7, OR8D2, OR51A7
neurological system process (GO:0050877)	OR5H1, TAS2R4, RRH, STRC, SLC6A3, OR11A1, CNGB1, HOXD10, CRYGA, HTR1B, OR4C15, TAS2R9, OR7C2, KCNQ2, TAAR5, OR10P1, CLN3, CRYAA, NPBWR1, OR51G1, OR1S2, OR52K2, OR8J1, OR5V1, OR8B8, OTOA, SEMA4A, CLCN1, TH, PCDHB13, CABP4, OPN1SW, OR6W1P, OR8U1, OR5A1, CDH3, GJC3, HCRTR1, OR10G8, HRH3, OR51B5, OR6Y1, OR5F1, POU3F1, SCNN1D, HAP1, OR6N1, NYX, ERCC2, OPN1MW, PDE6G, NPVF, OR4X2, EYS, OR3A3, P2RX3, OR4…
C21-steroid hormone biosynthetic process (GO:0006700)	CYP11A1, CYP11B1, LHB
Cytokine-cytokine receptor interaction (Kegg pathway hsa04060)	AMHR2, IL9R, IL29, CSF1, IL24, CCL16, CCL15, CCL24, IL17A, CCR6, IL15RA, TPO, XCR1, IL28A, FIGF
Brown module
GO class	Genes present
defense response (GO:0006952)	A2M, MICA, ADORA3, AIF1, TLR1, TLR2, TLR3, APOBEC3G, IL15, APOBEC3F, C1QC, TLR7, TGFB1, CD48, NLRC4, MYD88, LILRA3, CSF3R, IL1B, DDAH2, CFD, MX1, MX2, RAB27A, CIITA, F11R, C5AR1, NCF2, NCF1, PDPN, GNLY, SERPING1, HLA-C, HLA-B, HLA-G, SP140, C1QA, LILRB2, C1QB, HIF1A, CCR5, LILRB3, CCR2, MNDA, RIPK2, VSIG4, HLA-DRA, TNFAIP8L2, ITGAL, IFIH1, FGR, ITGB2, PYDC1, CD74, SLC11A1, SPP1, TYROBP, BLNK, CAR…
response to wounding (GO:0009611)	GNA13, A2M, ADORA3, HPS5, PDGFB, AIF1, F13A1, LY86, TLR1, TLR2, TLR3, IL15, TLR7, C1QC, TGFB1, GPX1, NLRC4, MYD88, CXCR4, AOAH, HMOX1, SERPINA3, IL1B, CFD, RAB27A, CIITA, F11R, LYN, LY96, PDPN, SERPING1, NFAM1, IL6R, NLRP3, PLAUR, CD163, C1QA, C1QB, HIF1A, CCR5, CCR2, PLA2G7, RIPK2, NGFR, CTSB, VSIG4, PROS1, C7, ITGAL, NMI, C3, CCR1, PABPC4, NINJ1, ITGB2, ITGB3, TPM1, TNFRSF1A, SLC11A1, PROCR, C2…
antigen processing and presentation (GO:0019882)	HLA-DQB1, MICA, HLA-DRB1, HLA-DRB3, IFI30, FCGRT, HLA-DMB, HLA-DMA, CD74, B2M, SLC11A1, PROCR, HLA-DRB4, FCER1G, HLA-DRB5, MR1, HLA-DPB1, HLA-DOA, HLA-J, HLA-A, HLA-C, HLA-B, HLA-E, HLA-DQA2, PSMB8, HLA-DQA1, HLA-G, HLA-F, PSMB9, HLA-DPA1, HLA-DRA
leukocyte activation (GO:0045321)	ITGAL, MICA, ELF4, STAT5A, TLR1, TLR2, PTPN22, TLR3, IL15, SKAP2, TLR7, HLA-DMA, CD74, TGFB1, ITGAM, CD48, SLC11A1, DOCK2, CXCR4, CLCF1, DPP4, RHOH, BLNK, SYK, RAB27A, PTPRC, KLF6, LYN, IKZF1, SWAP70, CEBPG, TGFBR2, CD276, STXBP2, MYO1F, SLAMF7, NFAM1, VAV1, PRKCD, GIMAP1, NCK2, NCK1, PLCG2, RIPK2, LCP1, LCP2
regulation of cytokine production (GO:0001817)	ELF1, STAT5A, IL18, TLR1, PPARG, TLR2, TLR3, PYDC1, TLR7, TGFB1, SLC11A1, MYD88, REL, HMOX1, PYCARD, FCER1G, IL1B, INPP5D, CASP1, EBI3, SRGN, AGPAT2, SYK, CARD8, CARD9, CEBPB, CEBPG, CD276, NFAM1, IL6R, NLRP3, GIMAP1, HIF1A, RIPK2, VSIG4, CD14, SASH3
T cell activation (GO:0042110)	ITGAL, PTPRC, MICA, IKZF1, ELF4, STAT5A, CD276, PTPN22, IL15, VAV1, HLA-DMA, CD74, TGFB1, ITGAM, GIMAP1, CD48, NCK2, SLC11A1, DOCK2, CXCR4, NCK1, RIPK2, LCP1, DPP4, RHOH, RAB27A, SYK
lymphocyte differentiation (GO:0030098)	KLF6, PTPRC, IKZF1, STAT5A, CEBPG, PTPN22, NFAM1, IL15, HLA-DMA, CD74, TGFB1, GIMAP1, DOCK2, CLCF1, PLCG2, SYK, RHOH, BLNK
Cyan module
GO class	Genes present
Ribosome (Kegg pathway hsa03010)	RPS10P7, RPS19, RPL18A, RPL15, RPL37, LOC729046, RPL39, RPS23, RPS3, RPL29
translational elongation (GO:0006414)	RPS10P7, RPS19, RPL18A, RPL15, RPL37, LOC729046, RPL39, RPS23, RPS3, RPL29
ribosomal subunit (GO:0033279)	RPS10P7, RPS19, RPL18A, RPL37, LOC729046, RPL13AP3, RPL39, RPS23, RPS3, RPL29
Green module
GO class	Genes present
serine-type endopeptidase activity (GO:0004252)	GZMM, F10, TPP1, CTRB2, RHBDL1, KLK10, GZMB, CMA1, HGFAC
response to carbohydrate stimulus (GO:0009743)	HNF1A, GCK, OXT, MAFA, THBS1, LCT
response to carbohydrate stimulus (GO:0009743)	HNF1A, GCK, OXT, MAFA, THBS1, LCT
peptide hormone secretion (GO:0030072)	GPR119, HNF1A, EXOC3L, MAFA, CACNA1C
Greenyellow module
GO class	Genes present
microtubule cytoskeleton (GO:0015630)	HAUS5, IFT80, PSRC1, TTLL5, DNHD1, TTLL7, TTLL11, HOOK3, BBS2, KIF1B, RIF1, ATG4C, NAV1, TUBE1, CEP290, CDK5RAP2, DST
microtubule cytoskeleton (GO:0015630)	HAUS5, IFT80, PSRC1, TTLL5, DNHD1, TTLL7, TTLL11, HOOK3, BBS2, KIF1B, RIF1, ATG4C, NAV1, TUBE1, CEP290, CDK5RAP2, DST
cytoskeleton (GO:0005856)	MTSS1, HAUS5, ENOX2, TTLL5, CPEB1, TTLL7, KLHL4, TTLL11, HOOK3, TUBE1, CEP290, CDK5RAP2, ANKS1B, MYO6, IFT80, MYO1C, MPDZ, MYH3, MICAL3, PSRC1, DNHD1, BBS2, KIF1B, RIF1, ATG4C, NAV1, HNRNPH1, DST
Grey60 module
GO class	Genes present
extracellular matrix structural constituent (GO:0005201)	ELN, WNT9B, MUC6, COL5A1
neurological system process (GO:0050877)	KCNQ4, OR2H1, HTR6, GRID2, POU4F2, HTR3A, OR1F1, OR1D2, KIFC3
epidermis development (GO:0008544)	DCT, SPRR2E, COL5A1, KRT32
Lightcyan module
GO class	Genes present
chemokine activity (GO:0008009)	CCL1, CCL3, CCL3L3, CCL8, CCL4
regulation of transcription from RNA polymerase II promoter (GO:0006357)	EGR1, ZNF593, EGR2, KLF11, LMCD1, CBX4, NR4A3, FOSB, UBN1, AHR, GTF2H1, GABPB1, CSRNP1, JUND, CHD1, SKIL, KLF4
regulation of transcription from RNA polymerase II promoter (GO:0006357)	EGR1, ZNF593, EGR2, KLF11, LMCD1, CBX4, NR4A3, FOSB, UBN1, AHR, GTF2H1, GABPB1, CSRNP1, JUND, CHD1, SKIL, KLF4
regulation of synaptic plasticity (GO:0048167)	PLAT, EGR1, NRAS, ARC, EGR2
regulation of transmission of nerve impulse (GO:0051969)	PLAT, EGR1, NRAS, ARC, EGR2
Lightyellow module
GO class	Genes present
cell division (GO:0051301)	NOX5, CDK10, AURKB
Magenta module
GO class	Genes present
dynein complex (GO:0030286)	DNAH11, DNAH10, DNALI1, DNAH9, DNAH12, DNAI1, DNAH2, DYNLRB2, DNAH7, DNAI2, DNAH5, DNAH6
axoneme (GO:0005930)	DNAH11, DNAH10, DNALI1, DNAH9, DNAH12, SPAG6, RSPH4A, DNAH2, DNAH7, DNAI2, SPAG17, DNAH5
cilium (GO:0005929)	DNAH11, DNAH10, DNAH9, DNAH12, DNAH2, DNAH7, DNAI2, CNGA3, SPAG17, ENKUR, DNAI1, SPAG6, RSPH4A, TEKT2, CD24, SPEF1
Midnightblue module
GO class	Genes present
neuron differentiation (GO:0030182)	PTPRZ1, CLU, SOX2, EMX2, PAX6, GJA1, DOCK7, PRKG1, NR2E1, GPR98, NTRK3, SLC1A3, CRB1, MTPN, KAL1, DMD, NTRK2, ID4
neuron development (GO:0048666)	PTPRZ1, CLU, PAX6, GJA1, DOCK7, PRKG1, NR2E1, GPR98, SLC1A3, CRB1, KAL1, DMD, NTRK2
cell projection organization (GO:0030030)	PTPRZ1, CLU, PAX6, GJA1, DOCK7, PRKG1, NR2E1, GPR98, ITGA6, KAL1, DMD, CC2D2A, FGD6
Purple module
GO class	Genes present
humoral immune response (GO:0006959)	TRAF3IP2, MASP1, FOXJ1, C4B, BCL2, C1R, C1S, CFI
cell adhesion (GO:0007155)	AEBP1, IGFBP7, FLOT2, PCDHB4, ITGB4, CD99, ACTN1, ITGB5, ECM2, DDR2, CXCL12, ARHGAP6, SRPX, CD44, SORBS1, BCL2, ITGA7, COL6A2, COL6A1, ANTXR1, RAB13, JAM2, COL8A1, MFAP4
biological adhesion (GO:0022610)	AEBP1, IGFBP7, FLOT2, PCDHB4, ITGB4, CD99, ACTN1, ITGB5, ECM2, DDR2, CXCL12, ARHGAP6, SRPX, CD44, SORBS1, BCL2, ITGA7, COL6A2, COL6A1, ANTXR1, RAB13, JAM2, COL8A1, MFAP4
complement activation (GO:0006956)	MASP1, C4B, C1R, C1S, CFI
response to wounding (GO:0009611)	TPST1, MASP1, C4B, F2RL1, ANXA1, SMAD3, C1R, SMAD1, C1S, MDK, TIMP3, TGFB2, NOTCH2, S1PR3, PLSCR4, NUPR1, CD44, BCL2, NFE2L1, ID3, CFI, FGF2
Red module
GO class	Genes present
extracellular region (GO:0005576)	UTS2, CRP, VTN, APOA4, CFHR1, CFHR2, OGN, APOB, APOA2, CFHR4, SERPINA7, ITIH1, RESP18, SEMA3G, APOF, SERPINA4, KLK12, APOH, ITIH2, ITIH3, LBP, LTB, FGF3, CEACAM1, GHR, KNG1, COCH, HYAL1, PMCH, CILP, IL26, SAA4, F9, F7, COLEC11, MMP11, PCOLCE2, C8A, CBLN3, C8B, CBLN1, F2, PLA2G2A, TFPI, SLPI, COL1A1, ADAMTS5, C3P1, TG, GC, ODAM, SERPINA10, C9, C6, LUM, PF4, TRH, AHSG, PRSS8, MIA2, FGA, CCL20, FGB,…
Drug metabolism (Kegg pathway hsa00982)	GSTA2, CYP3A5, CYP3A7, CYP2C19, GSTA5, CYP2C9, CYP2C8, ADH1C, ADH1A, CYP2E1, CYP1A2, UGT1A8, ADH4, FMO3, AOX1, UGT2B11, UGT2B4, CYP2A7, UGT2B15, UGT2B7
extracellular space (GO:0005615)	UTS2, CRP, VTN, CFHR1, APOA4, APOA2, APOB, SERPINA7, APOF, APOH, LBP, LTB, GHR, KNG1, HYAL1, PMCH, CILP, SAA4, IL26, C8A, C8B, F2, PLA2G2A, TFPI, GC, TG, C3P1, C6, PF4, AHSG, PRSS8, CCL20, FGA, FGB, FCN2, SERPINC1, FGL1, LECT2, EPO, PLG, CCL17, LEP, AFM, CCL14, TNFSF11, CXCL13, HPX, IGFBP1, LIPC, HABP2
Complement and coagulation cascades (Kegg pathway hsa04610)	KNG1, CR2, C9, C6, F9, C4BPB, C4BPA, F7, PLG, C8A, C8B, FGA, FGB, F2, SERPINC1, TFPI, SERPIND1
Complement and coagulation cascades (Kegg pathway hsa04610)	KNG1, CR2, C9, C6, F9, C4BPB, C4BPA, F7, PLG, C8A, C8B, FGA, FGB, F2, SERPINC1, TFPI, SERPIND1
acute inflammatory response (GO:0002526)	CR2, C9, C6, CRP, SAA4, C4BPB, C4BPA, AHSG, CFHR1, C8A, C8B, APOA2, FCN2, F2, VNN1, LBP
positive regulation of immune response (GO:0050778)	CRTAM, CR2, C9, C6, CRP, C4BPB, C4BPA, SKAP1, CFHR1, C8A, C8B, HPX, FCN2, LBP
positive regulation of immune system process (GO:0002684)	CRTAM, C9, CR2, IL2RA, C6, CRP, C4BPB, C4BPA, F7, SKAP1, CFHR1, C8A, C8B, HPX, FCN2, VNN1, LBP, CD5
Steroid hormone biosynthesis (Kegg pathway hsa00140)	CYP3A5, CYP3A7, UGT1A8, HSD17B2, UGT2B11, UGT2B4, SRD5A2, UGT2B15, UGT2B7
Salmon module
GO class	Genes present
high-density lipoprotein particle (GO:0034364)	APOA1, SAA2, APOC3
extracellular region (GO:0005576)	PRB3, GAST, C8G, AMBP, TOR2A, FGG, LYNX1, APOA1, SAA2, CCL21, LRG1, APOC3, SFTPA2, SERPINA1, GFOD1, ORM2
plasma lipoprotein particle (GO:0034358)	APOA1, SAA2, APOC3
acute inflammatory response (GO:0002526)	SAA2, SERPINA1, ORM2, C8G
steroid binding (GO:0005496)	CYP3A4, APOA1, APOC3
Turquoise module
GO class	Genes present
synapse (GO:0045202)	SEPT5, SYT1, SEPT3, SYT4, GABRB3, SYT5, GABRB2, GRIK2, GABRB1, GRIK3, CASK, L1CAM, SYT7, ZNRF1, SYP, GRIN2B, GRIN2D, CHRNA7, LGI1, SCAMP5, KCND2, SPARCL1, PSD3, BSN, RPH3A, PCLO, CBLN4, MAGEE1, DOC2A, PI4K2A, NPTN, ERC2, ERC1, LRRK2, UNC13C, UNC13A, CDK5R1, SNAP91, ERBB4, ADRBK1, CACNB4, RIMS2, RIMS1, RIMS4, RIMS3, SLC32A1, GAD2, LRFN1, SLC30A3, GAD1, GABRD, PHACTR1, GABRA2, GABRA1, GRIN1, SYT12,…
synaptic transmission (GO:0007268)	SEPT5, SYT1, GABRB3, SYT4, SYT5, GABRB2, GRIK2, VIPR1, GRIN2B, GRIN2D, HTR1F, KCND2, SCN2B, KIF5A, BSN, PCLO, CTNNA2, DOC2A, CAMK4, HTR7, AKAP5, CARTPT, ABAT, UNC13C, SCN1B, KCNA1, CACNB2, CACNB4, RIMS1, GAD2, GAD1, GABRD, UNC119, GABRA2, CPNE6, GABRA5, GRIN1, LIN7B, LOC100131098, HOMER1, KCNK3, VDAC1, PDE7B, NPY, MTNR1B, TMOD2, CACNA1E, CHRNB2, RIT2, SST, CACNA1A, CACNA1B, GABBR2, SLC1A4, KCNQ5,…
transmission of nerve impulse (GO:0019226)	SEPT5, SYT1, GABRB3, SYT4, SYT5, GABRB2, GRIK2, VIPR1, GRIN2B, GRIN2D, HTR1F, KCND2, SCN2B, KIF5A, BSN, PCLO, CTNNA2, DOC2A, CAMK4, HTR7, AKAP5, CARTPT, ABAT, UNC13C, SCN1A, SCN1B, KCNA1, CACNB2, CACNB4, RIMS1, GAD2, GAD1, GABRD, UNC119, GABRA2, CPNE6, SPTBN4, GRIN1, GABRA5, LIN7B, LOC100131098, HOMER1, KCNK3, VDAC1, PDE7B, NPY, MTNR1B, TMOD2, CACNA1E, CHRNB2, SCN8A, RIT2, SST, CACNA1A, CACNA1B, …
neuron projection development (GO:0031175)	GPRIN1, NRP1, UCHL1, PIP5K1C, L1CAM, NRCAM, BDNF, UNC5A, ROBO2, SPON2, DSCAM, EFNB3, STMN3, NRXN3, BAIAP2, STXBP1, NRXN1, TBR1, CDK5, SLIT1, SLIT2, CTNNA2, SLIT3, NUMBL, AMIGO1, BBS1, SLITRK1, SLITRK4, SLITRK3, NDEL1, SEMA4F, FOXG1, EFNA5, SLITRK5, GAP43, KALRN, RAB3A, CDK5R1, LPPR4, CCK, ABI2, EPHB3, HPRT1, MYCBP2, LINGO1, RAC3, PTK2B, LHX2, BCL11B, BAI1, B3GNT1, DCX, LAMB1, NEFL, SNAP25, DCLK1,…
neuron differentiation (GO:0030182)	GPRIN1, TUBB2A, L1CAM, RORB, NRCAM, ATP2B2, BDNF, UNC5A, ROBO2, SPON2, DSCAM, EFNB3, STMN3, EMX1, STMN2, BAIAP2, PTPRR, TBR1, NUMBL, CTNNA2, THY1, SLITRK1, SLITRK4, SLITRK3, NDEL1, HES5, FOXG1, EFNA5, SLITRK5, KALRN, CDK5R1, LPPR4, ONECUT2, SOX5, EPHB3, RAC3, LHX2, NGRN, BAI1, B3GNT1, LHX6, LAMB1, OLFM3, BMP4, MAP2K1, BHLHE22, HTT, SPTBN4, NTN4, CELSR3, EPHA4, FEZF2, DLX1, ULK1, DLX5, MAP2, CHRNB…
neurotransmitter transport (GO:0006836)	SEPT5, PPFIA3, RAB3A, CPLX3, SYT1, CPLX2, CPLX1, SYT4, RIMS1, RIMS4, RIMS3, SLC32A1, SYN1, SYN2, SNPH, SV2B, SV2A, SNAP25, STX1A, GABRA2, ICA1, SLC25A4, SLC6A11, NRXN3, SLC6A12, LIN7B, NLGN1, PCLO, STX1B, GRM4, DOC2A, GRM2, SLC17A6, SLC6A7, CACNA1A
