# Supplementary material for: Transcriptome analysis of normal-appearing white matter reveals cortisol- and disease-associated gene expression profiles in multiple sclerosis
Source: Acta Neuropathol Commun. 2019 Apr 25;7:60. doi: 10.1186/s40478-019-0705-7 (PMC6485096; doi:10.1186/s40478-019-0705-7)
Supplement: Supplementary file 2 — DE genes. (XLSX 266 kb) [file 40478_2019_705_MOESM2_ESM.xlsx]

## Sheet: MS vs Control
Gene	Systematic name	Probe	Average Control	Average MS	logFC	p value	p value (adjusted)
IGKC	ENST00000390237	A_33_P3226154	9.56982	11.9967	2.42688	5.59445e-05	0.00606554
IGHG1	ENST00000390549	A_33_P3424591	9.24778	11.5099	2.26208	9.93858e-05	0.00842942
IGKV1-27	ENST00000498435	A_24_P212024	6.84857	8.44593	1.59736	0.00178159	0.0450289
IGKV3-15	ENST00000390252	A_24_P357847	6.47939	8.04434	1.56495	0.00154091	0.0415158
HSPA1A	NM_005345	A_23_P111132	12.8141	14.1735	1.35941	0.000547579	0.0231655
SERPINA3	NM_001085	A_33_P3399788	11.5816	12.9397	1.35803	0.00048052	0.0214359
SERPINA3	NM_001085	A_23_P2920	10.2435	11.5687	1.32522	0.000474357	0.0212743
HSPA6	NM_002155	A_23_P114903	7.45896	8.63984	1.18088	0.000610679	0.0247987
SERPINA3	NM_001085	A_23_P162918	9.14033	10.2959	1.15554	0.000435557	0.0201826
BAG3	NM_004281	A_23_P47077	7.74203	8.88135	1.13932	2.0064e-06	0.000840244
CHI3L2	NM_001025199	A_23_P12082	7.37002	8.44652	1.0765	0.000905782	0.0304335
ITGB1BP1	NM_004763	A_33_P3216232	9.0432	10.1138	1.07061	1.9526e-06	0.000835914
CFD	NM_001928	A_23_P119562	8.90785	9.95005	1.0422	0.000979099	0.0316508
HSPH1	NM_006644	A_23_P88119	11.5118	12.4893	0.977484	0.00109519	0.0336615
HSPH1	NM_006644	A_33_P3348752	9.53302	10.4807	0.947632	0.00206458	0.0494762
CD44	NM_000610	A_33_P3294509	11.0066	11.9523	0.94571	0.00117096	0.0350891
SLC5A3	NM_006933	A_33_P3277110	8.58769	9.52794	0.940248	2.06334e-05	0.00347367
LY6H	NM_002347	A_23_P134914	8.14682	9.07337	0.926544	0.000428574	0.0200532
TUBA1C	NM_032704	A_24_P188071	9.43551	10.3565	0.921035	5.73907e-05	0.00616251
S100A10	NM_002966	A_23_P137984	9.83252	10.7458	0.91325	0.00123297	0.0362025
S100A6	NM_014624	A_23_P201711	11.4866	12.3714	0.884734	4.8626e-06	0.00139085
P4HA2	NM_004199	A_23_P30363	7.949	8.82934	0.880345	1.29684e-05	0.00249693
IGFBP7	NM_001553	A_23_P353035	11.8203	12.6978	0.877503	3.8211e-06	0.00120768
MGST1	NM_145791	A_23_P36658	10.2994	11.1691	0.869721	9.40585e-05	0.00819072
DNAJA1	NM_001539	A_24_P9671	10.5261	11.3903	0.864176	0.000139226	0.0102739
HEJ1	AF395440	A_33_P3807268	9.20769	10.0675	0.859805	0.000125576	0.00977434
CHORDC1	NM_012124	A_23_P138805	9.25476	10.085	0.830271	0.000549734	0.0231663
PALLD	NM_016081	A_23_P213102	10.7737	11.6005	0.826865	5.32367e-05	0.00596629
S1PR3	NM_005226	A_33_P3281283	7.97355	8.79526	0.821708	6.9247e-06	0.00165708
HSPB1	NM_001540	A_33_P3287646	12.8259	13.6463	0.820387	0.000364867	0.0184343
AHSA1	NM_012111	A_23_P117599	9.74952	10.5585	0.808973	5.0748e-06	0.00140498
A_33_P3232544	A_33_P3232544	A_33_P3232544	8.50467	9.31036	0.805693	3.58e-08	8.36624e-05
TAGLN2	NM_003564	A_33_P3319760	8.47215	9.27323	0.80108	0.000219593	0.0134248
SPR	NM_003124	A_23_P68211	8.16041	8.96024	0.799829	3.36291e-05	0.0047338
CACYBP	NM_014412	A_32_P114574	9.82906	10.6266	0.797522	3.40278e-05	0.00475
RNU105A	NR_004404	A_33_P3254695	8.36366	9.16068	0.797012	7.49714e-05	0.00728725
hCG_1776018	NM_001101387	A_33_P3246663	8.96763	9.75927	0.791641	0.00186053	0.0460412
SNORA73A	NR_002907	A_33_P3316505	7.61979	8.40594	0.786145	5.89786e-05	0.00627271
DCN	NM_001920	A_23_P64873	10.1216	10.8972	0.775605	0.000259103	0.0148384
FAM46C	NM_017709	A_33_P3314176	6.6569	7.42769	0.770786	0.000991138	0.031928
IFITM1	NM_003641	A_33_P3423941	10.0243	10.7901	0.765776	3.85668e-05	0.00510698
HSPA4L	NM_014278	A_23_P363936	6.33856	7.10354	0.764979	8.32561e-05	0.00762037
DTNA	NM_001391	A_24_P36229	8.42798	9.18992	0.761942	0.000109241	0.00884007
HTATIP2	NM_006410	A_23_P64129	9.5358	10.2943	0.758509	8.222e-07	0.000550924
STIP1	NM_006819	A_24_P327815	7.22098	7.97856	0.757581	1.1686e-06	0.000674982
RAB13	NM_002870	A_23_P46369	7.84242	8.59576	0.753335	5.26345e-05	0.0059573
ACTA2	NM_001613	A_23_P150053	7.8979	8.65114	0.753236	0.000472074	0.0212003
ANO6	NM_001025356	A_23_P389118	8.47946	9.22821	0.748754	4.9789e-05	0.00581195
CAV1	NM_001753	A_24_P12626	7.29899	8.04763	0.748643	9.4014e-05	0.00819072
CFI	NM_000204	A_23_P7212	7.37652	8.1121	0.735581	0.0017906	0.0450704
CDKN2C	NM_078626	A_33_P3292540	8.61555	9.34809	0.73254	3.03e-08	8.36624e-05
TMTC1	NM_175861	A_32_P2452	8.4498	9.17657	0.726776	2.99842e-05	0.00443706
CASP7	NM_033338	A_23_P12572	7.89015	8.6168	0.726658	2.79028e-05	0.00424909
PRRX1	NM_006902	A_33_P3263890	8.90548	9.62852	0.723035	1.34232e-05	0.0025407
AHSA2	NM_152392	A_23_P372467	10.9174	11.639	0.721532	0.000401988	0.0194782
HSP90AB5P	AY956766	A_33_P3882659	10.2271	10.9474	0.720332	0.000162013	0.0111294
RNU105A	NR_004404	A_33_P3355407	7.91083	8.62742	0.716596	8.12475e-05	0.00756098
LGALS3	NM_002306	A_23_P128919	10.3784	11.0927	0.714243	0.000735203	0.0271088
CCDC117	NM_173510	A_23_P432034	7.89579	8.60973	0.713939	2.729e-07	0.000240638
CP	NM_000096	A_33_P3343196	7.42773	8.14145	0.713717	0.00100532	0.03223
HSP90AB1	NM_007355	A_23_P145089	11.0603	11.774	0.713671	3.85542e-05	0.00510698
NR2F2	NM_021005	A_23_P88589	7.77038	8.4835	0.713118	8.50574e-05	0.00763966
TGFBR2	NM_001024847	A_23_P211957	9.38032	10.0912	0.710865	1.119e-06	0.000674982
CP	NM_000096	A_33_P3296587	7.88977	8.59706	0.707294	0.00188216	0.0462966
MAPK4	NM_002747	A_33_P3307337	9.11774	9.82322	0.705486	0.000314895	0.0169064
LRP4	NM_002334	A_24_P403561	10.7865	11.4782	0.691654	0.000247773	0.0143229
STIP1	NM_006819	A_32_P92783	7.82875	8.52004	0.691285	8.2682e-06	0.00182238
FLNA	NM_001110556	A_33_P3366120	9.37601	10.0669	0.690911	7.80759e-05	0.00740992
SORBS1	NM_001034954	A_24_P317907	9.3121	10.0009	0.688786	0.000144587	0.0105041
FKBP4	NM_002014	A_32_P71788	7.21733	7.9045	0.687172	4.96024e-05	0.00581042
DNAJB6	NM_058246	A_23_P385063	7.6177	8.30319	0.685489	2.23067e-05	0.00363984
TIMP1	NM_003254	A_23_P62115	8.39766	9.08007	0.68241	0.00186078	0.0460412
TMEM51	NM_001136216	A_33_P3363560	8.30304	8.98072	0.677679	0.0001043	0.00871389
SORBS1	NM_001034954	A_33_P3288329	9.21096	9.88374	0.672788	0.0010364	0.0327252
ZNF436	NM_001077195	A_23_P51202	8.34025	9.01221	0.671958	1.94e-08	8.36624e-05
DDIT4L	NM_145244	A_33_P3372099	8.06136	8.73239	0.671021	0.00190576	0.0467742
FRMD3	ENST00000304195	A_33_P3363425	7.67985	8.35001	0.670164	0.00034353	0.0178433
HSP90AB2P	NR_003132	A_33_P3324890	8.77725	9.44739	0.670136	0.000438773	0.0202476
HSPA6	NM_002155	A_33_P3382331	7.08785	7.75314	0.665292	0.000122044	0.00961649
PLOD1	NM_000302	A_23_P137532	8.15511	8.81889	0.663779	8.53e-08	0.000119077
C1R	NM_001733	A_23_P125423	8.05649	8.71959	0.663094	0.000267503	0.0151383
LEPREL1	NM_018192	A_23_P69179	10.0461	10.7026	0.656496	4.14468e-05	0.00531443
C10orf116	NM_006829	A_23_P161439	11.7964	12.4506	0.654199	0.000685137	0.0263381
TLR4	NM_138554	A_32_P66881	8.22817	8.88149	0.653316	0.00101233	0.0323308
BST2	CR591045	A_33_P3220911	9.5579	10.2069	0.648974	0.000205032	0.0129169
BST2	NM_004335	A_23_P39465	8.79174	9.43885	0.647116	0.000257149	0.014777
A_24_P24142	A_24_P24142	A_24_P24142	9.30186	9.94535	0.643496	3.00642e-05	0.00443706
IFITM4P	NR_001590	A_24_P16124	11.0176	11.658	0.640401	5.61833e-05	0.00607179
PDIA6	NM_005742	A_24_P319715	8.36105	8.99779	0.636746	4.3096e-06	0.00130072
RAB23	NM_016277	A_23_P70794	7.66861	8.30317	0.634557	1.1597e-06	0.000674982
DCN	NM_133507	A_33_P3382856	6.9285	7.56175	0.633248	0.000139017	0.0102739
COLEC12	NM_130386	A_23_P27306	7.96998	8.60239	0.632413	0.00200594	0.0485221
IER5	NM_016545	A_23_P86330	9.76967	10.3994	0.629727	0.00177715	0.0450289
HSP90AA1	NM_001017963	A_32_P199252	12.1522	12.7797	0.627587	0.00181008	0.0452884
KANK2	NM_015493	A_23_P50426	9.862	10.4882	0.626224	2.24896e-05	0.00363984
CLIC2	NM_001289	A_33_P3775848	6.98589	7.61173	0.62584	0.00101609	0.0324201
A_24_P84048	A_24_P84048	A_24_P84048	9.69389	10.3183	0.624445	3.7e-09	4.10252e-05
AKR1C3	NM_003739	A_23_P138541	9.00732	9.6302	0.622872	0.00126035	0.0367808
PTPN13	NM_080685	A_23_P18493	9.59395	10.2123	0.618395	1.3126e-06	0.000709266
RPS3	NM_001005	A_32_P182941	10.5998	11.218	0.618115	4.5e-08	8.36624e-05
A_33_P3231242	A_33_P3231242	A_33_P3231242	9.86525	10.4834	0.618111	1.5e-07	0.000160696
CD99	NM_002414	A_24_P70993	9.21146	9.82808	0.616622	0.000987735	0.031849
KIAA0114	NR_024031	A_24_P902052	8.73499	9.3449	0.609904	3.444e-07	0.00026829
RPS29	NM_001030001	A_33_P3282840	8.87692	9.48535	0.608428	3.4758e-06	0.00115294
CACYBP	NM_014412	A_24_P84428	9.68775	10.2938	0.606021	0.000926193	0.0307301
PECAM1	NM_000442	A_33_P3405213	7.32464	7.92999	0.605347	0.000226146	0.0137253
MRPL18	NM_014161	A_23_P8339	10.862	11.467	0.605053	2.39e-08	8.36624e-05
TMIE	NM_147196	A_33_P3261408	7.60461	8.20311	0.598505	0.000341803	0.0177812
ACVRL1	NM_000020	A_24_P945113	8.23578	8.83292	0.597143	0.00165648	0.0431871
A_32_P514599	A_32_P514599	A_32_P514599	9.33113	9.92431	0.593177	2.7025e-05	0.00417231
PPAPDC1A	NM_001030059	A_24_P810290	9.08218	9.67224	0.590056	5.82e-08	9.74667e-05
HSPB1	NM_001540	A_33_P3353242	6.74833	7.32738	0.579046	4.33372e-05	0.00539733
ENST00000399573	ENST00000399573	A_24_P15502	11.4217	11.998	0.576348	0.000494148	0.0216688
IFITM2	NM_006435	A_24_P287043	12.2613	12.8362	0.574925	0.00178871	0.0450566
AATF	NM_012138	A_23_P89460	9.79908	10.3731	0.574005	7.066e-07	0.000493146
ENST00000398981	ENST00000398981	A_24_P50437	9.87238	10.4449	0.572521	0.000134449	0.0101221
FRMD3	NM_174938	A_33_P3363420	7.55219	8.1241	0.571912	0.00170826	0.0439555
HSPA1L	NM_005527	A_23_P70547	7.26292	7.83392	0.570994	8.0115e-05	0.00753936
CEBPG	NM_001806	A_33_P3253807	9.62804	10.1979	0.56987	0.000366818	0.0184522
NSA2	NM_014886	A_23_P167444	10.31	10.8798	0.569849	2.413e-07	0.000224545
ACTG2	NM_001615	A_23_P39955	7.07326	7.64202	0.568755	0.00187522	0.0461939
EMCN	NM_016242	A_23_P382065	7.29419	7.86238	0.568184	0.000297703	0.0163179
GNG12	NM_018841	A_33_P3399318	8.04957	8.61704	0.567476	0.000690267	0.0263386
ENST00000391405	ENST00000391405	A_33_P3254510	9.25118	9.81631	0.565132	0.000580283	0.0240304
ZAK	NM_133646	A_23_P318300	8.24093	8.80483	0.563903	0.00027215	0.0152723
ITGB5	NM_002213	A_23_P166633	8.14284	8.7064	0.563556	2.48543e-05	0.00389098
POLE4	NM_019896	A_23_P154234	9.55828	10.1135	0.555192	4.09e-08	8.36624e-05
PPM1D	NM_003620	A_32_P150030	8.28518	8.83962	0.554445	3.061e-07	0.000251055
PGF	NM_002632	A_33_P3276693	7.70074	8.25468	0.553941	0.00137708	0.0388669
CACYBP	NM_014412	A_24_P45379	7.25415	7.80685	0.552699	0.000996427	0.0319948
SHISA3	NM_001080505	A_23_P41476	6.32465	6.87655	0.551906	0.00116214	0.0349914
RCN1	NM_002901	A_23_P203299	8.87985	9.43057	0.55072	0.00149573	0.0409061
RCC1	NM_001048194	A_23_P46309	6.54975	7.0986	0.548852	8.6442e-06	0.00185639
CALHM2	NM_015916	A_23_P202219	7.18902	7.73639	0.547362	1.90931e-05	0.00338442
PARP9	NM_031458	A_23_P69383	6.80994	7.35667	0.546724	4.50599e-05	0.00546192
GALNTL2	NM_054110	A_23_P212119	10.9737	11.5165	0.542795	0.00196912	0.0478732
TPD52L1	NM_001003397	A_33_P3398065	7.39264	7.93507	0.542434	0.000235309	0.0139219
CAV1	NM_001753	A_23_P134454	7.73368	8.27527	0.541584	0.00045009	0.0205435
SLC6A12	NM_003044	A_23_P76386	7.50378	8.04424	0.540461	3.90986e-05	0.00515702
PLIN2	NM_001122	A_23_P134953	7.48017	8.01891	0.53874	0.000206591	0.0129611
ZC3HAV1	NM_020119	A_33_P3397418	9.09038	9.62895	0.538572	1.0146e-06	0.000641342
CFI	NM_000204	A_24_P92472	6.36444	6.90201	0.537566	0.000820213	0.0287135
TNS3	NM_022748	A_24_P346431	8.46455	9.00175	0.537197	0.00118241	0.0352429
FBXW4	NM_022039	A_23_P342825	10.0152	10.55	0.534851	2.75976e-05	0.00422181
EMP2	NM_001424	A_23_P106682	9.02845	9.56326	0.534809	5.881e-06	0.00155138
SLC12A7	NM_006598	A_33_P3357530	9.97302	10.5072	0.534175	7.72954e-05	0.00739872
TNFRSF1A	NM_001065	A_23_P139722	7.32368	7.85739	0.53371	0.0014235	0.039676
SPATS2L	NM_001100422	A_33_P3400389	9.47298	10.0042	0.531208	1.198e-07	0.000151176
RRAS	NM_006270	A_23_P39076	8.86166	9.39285	0.531183	3.3798e-05	0.00473766
A_33_P3234410	A_33_P3234410	A_33_P3234410	8.95204	9.48218	0.530135	0.000286817	0.0158563
TMEM54	NM_033504	A_33_P3230219	10.3477	10.8773	0.529621	5.05697e-05	0.00586224
ENG	NM_000118	A_23_P83328	7.15593	7.6853	0.529372	7.4416e-06	0.00174342
THAP2	NM_031435	A_24_P350437	6.96568	7.49417	0.528487	8.42323e-05	0.00763966
FAM46A	NM_017633	A_33_P3410599	6.76375	7.29153	0.527774	0.000499174	0.0217752
FLOT2	NM_004475	A_23_P55319	9.74428	10.2715	0.527264	2.1258e-06	0.000855046
CDK2AP2	NM_005851	A_33_P3329839	12.0382	12.5647	0.526472	5.85644e-05	0.00624849
PSAP	NM_001042465	A_24_P309317	10.3216	10.848	0.526454	0.00119074	0.0354283
PLEKHF2	NM_024613	A_23_P20275	8.27889	8.80479	0.525904	1.401e-06	0.000733364
HIST1H1C	NM_005319	A_23_P122443	10.95	11.4755	0.525464	0.00183742	0.0455979
SIGIRR	NM_021805	A_23_P84344	10.0864	10.6108	0.52447	1.5e-09	2.52151e-05
P4HA1	NM_001142595	A_33_P3214481	8.402	8.9259	0.523906	0.000694459	0.0263902
ABLIM1	NM_001003408	A_33_P3388651	9.04313	9.56693	0.523801	0.000719671	0.026939
TGM2	NM_004613	A_32_P86763	7.0172	7.54031	0.523107	0.000369785	0.0185033
FARP1	NM_005766	A_23_P204998	8.1608	8.68339	0.522586	3.73984e-05	0.00501169
SNX3	NM_003795	A_23_P42498	12.0264	12.5489	0.522543	1.1411e-06	0.000674982
PRMT2	NM_206962	A_23_P80156	9.11962	9.64025	0.520634	1.72e-08	8.36624e-05
MICB	NM_005931	A_23_P387471	6.54875	7.069	0.520251	0.00054764	0.0231655
TM9SF2	NM_004800	A_24_P210399	8.01591	8.53453	0.518613	5.43868e-05	0.00596629
TMEM178	NM_152390	A_23_P142738	8.35213	8.8706	0.518472	0.00151924	0.0411648
PPID	NM_005038	A_23_P386411	8.75364	9.27211	0.518469	0.00063572	0.0252379
RPL5	NM_000969	A_23_P12140	10.2024	10.7204	0.518002	0.000706499	0.0266244
RPL29P2	NR_002778	A_24_P7085	9.99054	10.5081	0.517603	3.07303e-05	0.00449576
DEDD2	NM_133328	A_24_P207479	8.88323	9.39718	0.513946	6.40595e-05	0.0065832
SNTB2	NM_006750	A_33_P3281333	7.51246	8.02602	0.513551	0.000106411	0.00875379
PTRF	NM_012232	A_23_P394064	12.6666	13.1766	0.509941	0.000478712	0.0214123
CHDH	NM_018397	A_23_P69293	8.21712	8.72688	0.509757	1.79413e-05	0.00323156
SERHL2	NM_014509	A_23_P120953	9.00353	9.51197	0.508445	0.00169829	0.0438338
ZBTB1	NM_014950	A_23_P99693	7.36803	7.87629	0.508259	0.00176742	0.0449257
A_33_P3316379	A_33_P3316379	A_33_P3316379	9.18473	9.69054	0.505806	0.000695557	0.0263902
ENST00000367913	ENST00000367913	A_33_P3276364	6.93044	7.43574	0.505298	0.000660969	0.0257739
POLE4	NM_019896	A_33_P3229177	9.80557	10.3093	0.503762	2.79e-08	8.36624e-05
PDE5A	NM_001083	A_33_P3378514	7.29377	7.796	0.502227	0.000217562	0.0133857
MAF1	NM_032272	A_23_P33072	7.81226	8.3125	0.500237	4.8988e-06	0.00139085
HSPA4	NM_002154	A_24_P377269	11.0904	11.5887	0.498326	3.65629e-05	0.00492988
FANCB	NM_001018113	A_23_P356021	7.68979	8.18712	0.497331	0.000965242	0.0313966
IDH1	NM_005896	A_32_P45009	8.72359	9.21959	0.496004	1.2237e-06	0.000683246
C19orf25	NM_152482	A_23_P424597	8.60069	9.09666	0.495966	0.000135637	0.0101431
SNX3	NM_003795	A_24_P277807	10.9549	11.4501	0.495236	3.2879e-06	0.00111263
SSFA2	NM_006751	A_23_P102060	10.9174	11.4094	0.492026	1.6158e-06	0.000781811
LOC729046	XR_015710	A_24_P213354	10.7217	11.2123	0.490617	7.829e-06	0.0017648
CALCRL	NM_005795	A_33_P3261957	6.49417	6.98419	0.49002	3.1548e-06	0.00107849
TNFSF14	NM_003807	A_24_P237036	6.29257	6.78107	0.488502	0.000267446	0.0151383
POLDIP3	NM_032311	A_23_P502269	10.3975	10.8856	0.488027	7.4e-09	6.22774e-05
TPST1	NM_003596	A_23_P145965	9.50659	9.99383	0.487246	0.00193042	0.0472064
TM4SF18	NM_138786	A_24_P120251	6.74832	7.23416	0.485837	0.000264788	0.0150866
YBX1	NM_004559	A_32_P218989	9.48304	9.96862	0.485579	2.108e-07	0.000207696
PLOD3	NM_001084	A_23_P168788	12.1281	12.6135	0.485405	0.000177567	0.0117799
GPR116	NM_001098518	A_33_P3380944	7.41405	7.89932	0.485277	0.00140955	0.039484
LOC399959	NR_024430	A_33_P3404316	10.3745	10.8595	0.484968	0.000200924	0.0128206
KIAA1462	NM_020848	A_23_P301521	9.22908	9.71378	0.484701	0.0019469	0.0475749
LSM10	NM_032881	A_24_P216681	8.89926	9.38243	0.483167	9.3602e-06	0.00199737
ABHD4	NM_022060	A_23_P205519	9.32135	9.8045	0.48315	0.000160082	0.0110981
TAP1	NM_000593	A_23_P59005	9.4963	9.97834	0.48204	0.000623185	0.0250035
LAMA2	NM_000426	A_23_P70719	7.27162	7.75289	0.481273	1.67674e-05	0.00303644
CARD6	NM_032587	A_23_P41854	7.28076	7.76115	0.480392	0.00065475	0.0256855
RPL23A	NM_000984	A_24_P91140	8.30536	8.78499	0.479634	5.2501e-05	0.0059573
DST	NM_020388	A_23_P348159	7.95737	8.43622	0.47885	0.000688821	0.0263386
A_24_P349547	A_24_P349547	A_24_P349547	9.65861	10.1371	0.47844	0.00174493	0.0445909
CKLF	NM_001040138	A_23_P206396	9.72641	10.2038	0.477397	1.766e-06	0.000821742
CRYZ	NM_001130042	A_33_P3391476	6.36332	6.83931	0.475986	8.891e-07	0.000584064
XPO1	NM_003400	A_23_P40078	8.972	9.44497	0.472965	8.56806e-05	0.00767506
SULT1A4	NM_001017389	A_33_P3294901	8.61568	9.0886	0.472915	0.000662387	0.0257739
HSP90B3P	NR_003130	A_33_P3401252	10.4678	10.9404	0.472686	0.000364747	0.0184343
RPS15A	NM_001019	A_33_P3304282	11.8335	12.3061	0.47266	1.3791e-06	0.00073335
HSPA8	NM_153201	A_33_P3390758	11.5628	12.0343	0.47149	0.0003692	0.0185033
CD151	NM_004357	A_33_P3229196	11.8568	12.3282	0.471429	0.00148026	0.0406823
RRAS2	NM_012250	A_33_P3297245	7.86483	8.33607	0.471239	0.00130894	0.0376121
RELA	NM_021975	A_23_P104689	8.18871	8.65752	0.468813	6.3059e-06	0.00157657
TRAM2	NM_012288	A_24_P12413	6.60378	7.07251	0.468729	2.37634e-05	0.00379105
TRIM47	NM_033452	A_33_P3235053	11.8062	12.2725	0.466335	0.000530769	0.022652
PCSK5	NM_006200	A_23_P257003	8.09987	8.56578	0.465903	0.000155147	0.0109657
TMEM79	NM_032323	A_33_P3320272	7.54523	8.01042	0.465188	3.7849e-06	0.00120768
IRF2BP2	NM_182972	A_24_P497186	8.18763	8.65269	0.465058	0.00157735	0.0420138
ST6GALNAC6	NM_013443	A_23_P315892	9.12653	9.59082	0.464285	0.000280223	0.0155947
MYL12A	NM_006471	A_23_P4572	10.6507	11.1147	0.464039	0.000409418	0.0195662
PRMT2	NM_206962	A_23_P211244	9.2728	9.73621	0.463406	4.29e-08	8.36624e-05
RPS9	NM_001013	A_33_P3303015	13.3969	13.8581	0.461194	2.5e-08	8.36624e-05
FTL	NM_000146	A_32_P155247	12.9515	13.4126	0.461133	0.00060308	0.0246454
PGPEP1	NM_017712	A_23_P327370	9.37497	9.8352	0.460228	2.8746e-06	0.00106924
SNX25	NM_031953	A_23_P18641	7.22212	7.68225	0.460129	0.000199743	0.0127725
A_24_P76358	A_24_P76358	A_24_P76358	9.45274	9.9123	0.459568	0.000563041	0.0235455
KCTD21	NM_001029859	A_33_P3299525	7.99461	8.45407	0.459467	1e-07	0.000134063
CALD1	NM_033138	A_24_P921366	10.2782	10.7376	0.459366	4.00339e-05	0.00520595
PYCR1	NM_006907	A_23_P130194	9.61416	10.0729	0.458693	0.00150441	0.0409529
PHF17	NM_199320	A_33_P3252925	8.82969	9.28808	0.458394	6.25997e-05	0.00653338
ENST00000399416	ENST00000399416	A_33_P3350452	7.38373	7.84132	0.457581	0.000116745	0.00926821
TMTC1	NM_175861	A_23_P203957	6.81802	7.27531	0.457281	0.000695029	0.0263902
A_33_P3371769	A_33_P3371769	A_33_P3371769	9.62506	10.0823	0.45721	0.000981557	0.0316803
PAPOLA	NM_032632	A_23_P376239	8.92905	9.38608	0.457023	0.00106098	0.0332316
APTX	NM_175073	A_23_P252775	8.56101	9.01784	0.456831	3.205e-07	0.000255632
ZFAND2A	NM_182491	A_23_P336992	8.59153	9.04741	0.455884	5.79148e-05	0.00619892
TMCO3	NM_017905	A_33_P3247255	7.52373	7.97906	0.455329	4.1559e-06	0.00130072
RPL10	NM_006013	A_24_P754803	13.8812	14.335	0.453841	3.47e-08	8.36624e-05
SLC22A17	NM_016609	A_24_P330385	9.96684	10.4203	0.453447	0.00010212	0.00859608
VAMP5	NM_006634	A_23_P39840	8.47714	8.93033	0.453194	0.00015229	0.0108377
A_24_P272548	A_24_P272548	A_24_P272548	9.56679	10.02	0.453159	2.5563e-06	0.000995829
RHOJ	NM_020663	A_24_P82032	6.97709	7.42962	0.452532	0.00103988	0.0327424
PDIA4	NM_004911	A_23_P42802	8.77161	9.22404	0.452428	0.000604968	0.0246454
RBM23	NM_001077351	A_23_P88249	8.07728	8.52893	0.451652	7.27788e-05	0.00720593
DKK3	NM_015881	A_33_P3261293	8.39999	8.85153	0.451546	0.00040672	0.0195536
A_33_P3345501	A_33_P3345501	A_33_P3345501	9.59601	10.0475	0.451511	2.9982e-06	0.0010757
ENST00000452253	ENST00000452253	A_24_P194934	11.9525	12.4026	0.45011	6.2637e-06	0.00157657
FXR1	NM_001013438	A_33_P3387300	10.4805	10.9277	0.447173	3.51241e-05	0.00482265
FLJ40125	NM_001080401	A_33_P3279681	6.6794	7.12601	0.446607	0.000347111	0.0179459
LGR4	NM_018490	A_24_P90216	8.35098	8.7972	0.446225	1.18434e-05	0.00237592
A_24_P366457	A_24_P366457	A_24_P366457	10.0049	10.4511	0.44622	0.000346184	0.0179256
RPS2	NM_002952	A_33_P3335124	11.8002	12.2457	0.44551	0.00020129	0.0128206
CD47	NM_198793	A_23_P6935	9.86987	10.3145	0.44465	0.000756751	0.0275273
NFASC	NM_001005388	A_33_P3406866	10.2935	10.7378	0.44427	0.00194995	0.0475972
TMOD3	NM_014547	A_23_P65674	8.47247	8.91433	0.441865	1.03428e-05	0.00216564
MGAT1	NM_001114618	A_33_P3317664	8.39436	8.83557	0.44121	0.000327393	0.0173824
RPS9	NM_001013	A_32_P22078	12.1009	12.5408	0.43996	2.7928e-06	0.00106324
EPHX1	NM_000120	A_23_P34537	8.91457	9.35373	0.439159	7.79483e-05	0.00740992
FTL	NM_000146	A_23_P50504	12.7579	13.1969	0.43891	0.00130491	0.0375925
PHB	NM_002634	A_23_P130040	9.31988	9.75794	0.438065	6.6386e-06	0.00162903
MAP3K7IP2	NM_015093	A_23_P19702	10.2434	10.6807	0.437302	0.00135482	0.0385636
RRAS2	NM_012250	A_33_P3234317	8.38443	8.82129	0.436868	0.00141239	0.0395304
TMX1	NM_030755	A_23_P76951	10.6343	11.0704	0.436099	7.4277e-06	0.00174342
MED25	NM_030973	A_33_P3322553	9.02584	9.46019	0.434344	1.59173e-05	0.00293
STARD8	NM_014725	A_23_P387630	7.42759	7.86179	0.434201	0.00087649	0.0297811
PDGFC	NM_016205	A_23_P58396	7.46495	7.89787	0.432924	0.000606096	0.0246454
GRLF1	NM_004491	A_33_P3367481	8.75424	9.18488	0.430641	0.000694278	0.0263902
ZNF671	NM_024833	A_23_P50217	8.43117	8.86149	0.430327	5.42845e-05	0.00596629
PTGES3	NM_006601	A_32_P114896	8.66942	9.0991	0.429686	0.00111626	0.0340281
TMEM79	NM_032323	A_23_P149259	8.06997	8.49906	0.429087	0.000470408	0.0211538
TPM1	NM_000366	A_24_P44462	7.02618	7.45512	0.428943	0.000632953	0.0252216
HSP90B1	NM_003299	A_33_P3408212	9.08889	9.51753	0.42864	0.000247964	0.0143229
FAM96A	NM_001014812	A_33_P3416037	9.7239	10.1497	0.425775	0.000186228	0.0121855
ENST00000409468	ENST00000409468	A_33_P3325306	12.4249	12.8506	0.425669	0.000735072	0.0271088
A_24_P178654	A_24_P178654	A_24_P178654	10.1017	10.5273	0.425577	0.000671052	0.0260807
LOC391359	XM_001726802	A_33_P3210561	8.66622	9.09164	0.425426	5.42578e-05	0.00596629
A_24_P350008	A_24_P350008	A_24_P350008	11.1104	11.5353	0.4249	0.000142215	0.01043
TJP2	NM_201629	A_24_P201153	8.37911	8.80353	0.424413	0.000615604	0.0249133
KIAA1462	NM_020848	A_33_P3293446	7.13675	7.56114	0.424388	0.00132556	0.0379564
NUDT3	NM_006703	A_23_P93389	9.33439	9.75808	0.423688	0.000839492	0.0291145
LAMB2	NM_002292	A_33_P3223780	8.89909	9.32229	0.4232	0.00122226	0.0360143
ECSCR	NM_001077693	A_23_P72651	6.40617	6.829	0.422832	0.000502521	0.0218418
A_24_P135501	A_24_P135501	A_24_P135501	10.785	11.2067	0.421729	3.0775e-06	0.0010757
HSPD1	NM_002156	A_32_P25273	13.821	14.2417	0.420758	0.000493874	0.0216688
A_24_P178444	A_24_P178444	A_24_P178444	7.54577	7.96584	0.420064	0.00142831	0.0396777
BMPR1A	NM_004329	A_23_P1431	6.93103	7.35027	0.419235	4.43903e-05	0.00543467
SDF2L1	NM_022044	A_23_P6344	11.839	12.2577	0.418697	0.000756294	0.0275273
PSMB8	NM_004159	A_23_P250629	7.45914	7.87766	0.418519	0.000748121	0.0273519
DNAJC18	NM_152686	A_32_P149251	8.33949	8.75791	0.418428	0.000216124	0.0133857
LASP1	NM_006148	A_23_P89187	8.69666	9.11436	0.417698	8.00339e-05	0.00753936
GTF2E2	NM_002095	A_23_P94118	7.27968	7.69417	0.414483	1.21883e-05	0.00241094
A_33_P3362812	A_33_P3362812	A_33_P3362812	10.3434	10.7578	0.414439	3.072e-07	0.000251055
ST13	NM_003932	A_32_P44512	9.94061	10.3545	0.413922	0.000130348	0.00994742
UBE2L6	NM_198183	A_23_P75741	8.24205	8.65568	0.413629	0.000574925	0.0238972
BAG2	NM_004282	A_23_P356554	7.29815	7.7116	0.413455	0.00183623	0.0455979
CRYZ	NM_001130042	A_33_P3405743	7.27103	7.68338	0.412346	0.00148263	0.0407139
JAM2	NM_021219	A_33_P3226212	9.47645	9.88799	0.411539	0.000924344	0.0307216
RPS2P32	NR_026676	A_24_P136182	12.121	12.5323	0.411385	0.000418142	0.0197583
A_24_P256037	A_24_P256037	A_24_P256037	11.7554	12.1667	0.411213	1.6335e-06	0.000781811
RPL10L	NM_080746	A_23_P341325	12.0902	12.5013	0.411126	7.5474e-06	0.00175593
FOXO4	NM_005938	A_24_P379165	8.50068	8.91181	0.411126	0.000498869	0.0217752
SLC22A5	NM_003060	A_24_P174755	7.965	8.37589	0.410898	0.000357426	0.0182538
UTRN	NM_007124	A_32_P524014	8.98485	9.39572	0.410867	0.000378116	0.0188226
BC070327	BC070327	A_24_P850428	11.3178	11.7284	0.410547	4.839e-07	0.000352407
TSPAN4	NM_001025237	A_33_P3413216	7.64137	8.0516	0.410237	0.000199414	0.0127725
RC3H2	ENST00000373670	A_23_P375147	8.24618	8.65563	0.409447	0.000869691	0.029657
ZHX1	NM_001017926	A_23_P43150	7.97346	8.38286	0.409408	0.00102287	0.0324791
EMP2	NM_001424	A_23_P304682	7.753	8.16181	0.408807	0.00192769	0.0471742
SNX7	NM_015976	A_23_P35066	8.96789	9.37651	0.408615	0.000268817	0.0151614
HSPE1	NM_002157	A_23_P56922	13.8074	14.2158	0.408371	0.000109934	0.00886792
POLD2	NM_006230	A_23_P71146	7.59162	7.99966	0.408038	5.49313e-05	0.00599449
FNDC3B	NM_022763	A_24_P223124	7.86499	8.27276	0.407775	0.00108246	0.0334854
GLTSCR2	NM_015710	A_23_P39131	9.10189	9.50948	0.407591	0.000423566	0.0199593
TXNDC5	NM_030810	A_23_P168229	8.72512	9.13239	0.407269	0.000323778	0.0172178
KLF3	NM_016531	A_24_P414376	9.69794	10.1052	0.407241	7.8406e-06	0.0017648
PRKCH	NM_006255	A_23_P205567	8.07977	8.48599	0.40622	0.000641786	0.0252657
PPP2CB	NM_001009552	A_23_P308097	10.5733	10.9795	0.406185	4.37014e-05	0.00542253
FAM46A	NM_017633	A_33_P3290573	7.1371	7.54298	0.405883	0.00084879	0.0292855
RFTN2	NM_144629	A_23_P363878	9.48728	9.8928	0.405525	0.00160619	0.0424832
ABHD3	NM_138340	A_23_P305759	7.03581	7.44096	0.405145	8.096e-05	0.00755521
CYHR1	NM_138496	A_24_P40978	7.59265	7.99684	0.404188	2.3103e-06	0.000910577
PRPF38B	NM_018061	A_23_P201567	7.65014	8.0537	0.403552	1.604e-06	0.000781811
C1orf43	NM_138740	A_24_P393461	8.86304	9.26635	0.403311	0.00168697	0.0436762
SGK493	NM_138370	A_33_P3242733	6.76324	7.16606	0.402818	8.31343e-05	0.00762037
ADPRHL2	NM_017825	A_23_P34568	8.21394	8.61665	0.402716	0.00029647	0.0162825
RPS3A	NM_001006	A_32_P135818	12.0129	12.4153	0.402425	0.000267298	0.0151383
IGBP1	NM_001551	A_23_P171255	7.73998	8.14187	0.401891	0.000517766	0.0222788
ERGIC3	NM_015966	A_24_P216313	8.4615	8.86321	0.40171	0.000385211	0.0190559
HSD17B7	NM_016371	A_23_P11859	6.84357	7.24438	0.40081	0.000782222	0.0279084
PTPRB	NM_002837	A_23_P53390	7.47014	7.87007	0.399935	0.00044114	0.0203289
RSL24D1	NM_016304	A_23_P65768	8.54354	8.94323	0.399687	0.00106558	0.0332316
PPIC	NM_000943	A_23_P422724	7.19684	7.59574	0.398897	0.000295298	0.0162659
SH3BGR	NM_007341	A_33_P3327822	9.50167	9.9003	0.398638	0.000386214	0.0190559
EIF4G2	NM_001418	A_33_P3306545	9.27072	9.6685	0.397784	0.000137304	0.0102247
PIGF	NM_002643	A_23_P131653	9.29238	9.69004	0.397662	3.0614e-06	0.0010757
RALY	NM_016732	A_23_P109235	8.79882	9.19619	0.397366	3.61299e-05	0.00492154
RPS3A	NM_001006	A_24_P383999	12.5802	12.9755	0.395379	9.88513e-05	0.00840537
NUDT9	NM_024047	A_23_P94860	10.2656	10.661	0.39536	0.000447155	0.0204653
EDA	NM_001399	A_23_P34045	7.0363	7.43104	0.394746	0.00010713	0.00875379
TMEM216	NM_016499	A_33_P3221868	7.74377	8.13736	0.393587	0.00145199	0.0401691
SMAD1	NM_005900	A_24_P71938	8.56276	8.95618	0.393419	0.000573157	0.0238829
HNRNPH3	NM_012207	A_24_P338187	9.08745	9.48051	0.393057	0.0012908	0.0374138
FANCF	NM_022725	A_23_P12896	7.89357	8.28643	0.392862	4.7069e-06	0.00136168
STARD3NL	NM_032016	A_33_P3275948	8.54501	8.93758	0.392574	0.000230918	0.0137851
GNA12	NM_007353	A_24_P98086	10.2477	10.6402	0.392501	1.9277e-06	0.000835914
CRK	NM_016823	A_24_P270814	7.04828	7.44062	0.39234	8.21766e-05	0.00761792
FCHSD2	NM_014824	A_23_P368278	8.82898	9.22064	0.391666	0.000452956	0.0206462
PCBD1	NM_000281	A_23_P367405	9.82861	10.2202	0.391606	0.00188934	0.0464052
BMI1	NM_005180	A_23_P314115	8.89694	9.28831	0.391368	0.000189636	0.0123209
PPIB	NM_000942	A_24_P304723	9.22877	9.61982	0.391047	5.3141e-05	0.00596629
ENST00000359659	ENST00000359659	A_24_P375849	11.4281	11.8185	0.390369	0.000148892	0.0106585
MIR17HG	NR_027350	A_33_P3313622	6.98365	7.37397	0.390327	0.000766531	0.0276038
THRA	NM_199334	A_24_P262407	10.1003	10.4904	0.390092	0.000268442	0.0151614
PDLIM5	NM_006457	A_32_P14610	10.0751	10.4646	0.389434	0.000241253	0.0140786
RAN	NM_006325	A_24_P47547	9.68907	10.0782	0.389181	0.000698779	0.0264227
RUNX3	NM_001031680	A_23_P51231	6.45473	6.84358	0.388851	0.00166634	0.0434103
EIF4B	NM_001417	A_23_P60286	8.65416	9.04287	0.388702	1.9443e-06	0.000835914
SLC16A2	NM_006517	A_23_P137097	8.1365	8.52489	0.388389	0.000637036	0.0252456
C1orf144	NM_015609	A_23_P115105	9.94663	10.3342	0.387533	5.7223e-06	0.00153366
C9orf7	NM_017586	A_33_P3218625	11.4707	11.8573	0.386607	0.000338093	0.0177291
A_33_P3234377	A_33_P3234377	A_33_P3234377	8.33573	8.72162	0.385888	0.00026184	0.0149441
CAV2	NM_001233	A_23_P123071	6.89459	7.28009	0.385501	0.000569284	0.0237511
A_24_P246692	A_24_P246692	A_24_P246692	11.777	12.162	0.384997	4.1395e-05	0.00531443
LASS4	NM_024552	A_23_P153867	9.25122	9.63604	0.384827	5.5742e-06	0.00151214
TRIM14	NM_014788	A_23_P216655	7.16257	7.54711	0.384538	0.00149361	0.0408816
SIRT7	NM_016538	A_33_P3391727	8.35888	8.74334	0.384463	0.000411388	0.0195782
A_24_P878388	A_24_P878388	A_24_P878388	11.5867	11.9712	0.384433	0.00190983	0.0468399
ZNF395	NM_018660	A_23_P146077	10.0975	10.4801	0.382565	0.000233755	0.0138606
FMO3	NM_001002294	A_23_P155596	6.19532	6.57736	0.382044	0.00155521	0.0416461
TRIM16L	NM_001037330	A_23_P129903	8.48079	8.86274	0.381947	0.000281353	0.0156317
NCK1	NM_006153	A_23_P255785	8.35264	8.73435	0.381709	5.1163e-06	0.00140498
ARID5B	NM_032199	A_32_P18440	9.85478	10.2348	0.379995	1.9776e-05	0.00342207
GLT25D1	NM_024656	A_23_P209183	7.63205	8.01155	0.379501	0.00045995	0.0208515
GPR146	NM_138445	A_23_P20035	7.80437	8.18313	0.378752	0.00187169	0.0461939
ZFP106	NM_022473	A_23_P77310	10.7652	11.1439	0.378713	0.000354922	0.0181813
RGL2	NM_004761	A_23_P93383	9.07653	9.45474	0.378212	0.00068861	0.0263386
A_24_P417606	A_24_P417606	A_24_P417606	12.5228	12.9005	0.377768	7.29154e-05	0.00720593
NCRNA00095	NR_024348	A_33_P3419835	6.62584	7.00334	0.377502	0.000906593	0.0304335
GALM	NM_138801	A_23_P67971	6.71197	7.08939	0.377417	0.000557094	0.0234175
A_24_P83808	A_24_P83808	A_24_P83808	8.94449	9.32151	0.377014	0.000118171	0.00935926
TMSB15A	NM_021992	A_23_P137173	6.34494	6.72151	0.376572	4.56539e-05	0.00546192
CD2BP2	NM_006110	A_24_P236522	8.95225	9.32857	0.37632	5.41728e-05	0.00596629
TRIM26	NM_003449	A_23_P214587	8.07365	8.44939	0.375742	0.000106515	0.00875379
RNF145	NM_144726	A_23_P167559	7.98409	8.35955	0.375465	0.000963707	0.0313966
SORD	NM_003104	A_23_P77103	8.20458	8.57978	0.375199	0.00156488	0.0418075
RPS18	NM_022551	A_33_P3385488	13.011	13.3857	0.374755	0.000834587	0.0290648
GCC1	NM_024523	A_23_P71094	7.34938	7.72406	0.37468	1.82378e-05	0.0032674
KRCC1	NM_016618	A_23_P56759	8.67052	9.04478	0.374258	0.000524074	0.0224781
STBD1	NM_003943	A_23_P254079	6.56148	6.93558	0.374093	0.000110327	0.00886792
KDELC2	NM_153705	A_33_P3214849	7.09283	7.46669	0.373853	0.000815542	0.0286084
NTN1	NM_004822	A_32_P53524	8.63429	9.00805	0.373759	0.0018213	0.0454876
OSTC	NM_021227	A_23_P411814	8.63994	9.01305	0.373113	0.000236009	0.0139219
ABCB1	NM_000927	A_23_P82523	7.05317	7.42619	0.373022	0.00170312	0.043857
FLJ37505	AK094824	A_33_P3809497	6.45229	6.82524	0.372946	0.000380161	0.0188821
A_33_P3210702	A_33_P3210702	A_33_P3210702	10.6104	10.9828	0.372491	0.000137967	0.0102487
A_33_P3358856	A_33_P3358856	A_33_P3358856	10.0193	10.3907	0.371418	0.000144149	0.0105041
ATP6V0E1	NM_003945	A_23_P213840	10.3294	10.7007	0.371252	0.000382436	0.0189532
MGAT1	NM_002406	A_23_P58482	9.74727	10.1179	0.370606	0.000380438	0.0188821
RPLP0P3	CR612178	A_24_P341677	10.4207	10.7908	0.370183	0.000742021	0.0272579
IL10RB	NM_000628	A_24_P322741	7.12884	7.49886	0.370017	0.000298247	0.0163179
A_24_P127312	A_24_P127312	A_24_P127312	7.94458	8.31449	0.369909	0.00117307	0.0351017
TBL1Y	NM_033284	A_23_P114466	7.94674	8.31659	0.369856	0.000888558	0.0300388
MEF2B	NM_001145785	A_33_P3344405	9.668	10.0373	0.369263	0.000921237	0.0306792
GEMIN6	NM_024775	A_23_P56567	8.22478	8.59351	0.368729	3.10245e-05	0.00451906
TNPO1	NM_002270	A_24_P260440	8.1397	8.5081	0.368399	0.000191059	0.0123808
NUFIP2	NM_020772	A_24_P791829	9.14111	9.50907	0.36796	6.08755e-05	0.00641337
TMEM140	NM_018295	A_24_P372134	7.93255	8.30029	0.367744	0.000435378	0.0201826
NR1H2	NM_007121	A_23_P55926	7.85059	8.21826	0.367672	0.000370044	0.0185033
CCT4	NM_006430	A_33_P3229397	11.836	12.2027	0.366626	0.000475387	0.021292
ENAH	NM_001008493	A_32_P87568	6.74512	7.11142	0.366295	0.00207064	0.0495505
ESPNL	NM_194312	A_24_P170983	6.87866	7.24483	0.366172	0.00168368	0.043669
NFIB	NM_005596	A_24_P658427	9.56617	9.93169	0.365514	0.000144972	0.0105041
CCDC107	NM_174923	A_23_P387045	9.04735	9.41282	0.365472	6.3648e-06	0.0015795
TPT1	NM_003295	A_24_P179351	14.4029	14.7668	0.363821	6.04466e-05	0.00638827
LOC100128288	NR_024447	A_24_P256415	7.07325	7.43698	0.363731	0.0015336	0.0413676
FGF11	NM_004112	A_33_P3333282	6.69073	7.0539	0.363168	0.000145481	0.0105041
ST13	NM_003932	A_32_P167791	9.5344	9.89749	0.363088	0.000231247	0.0137851
ZNF544	NM_014480	A_24_P324640	7.85976	8.22278	0.363018	1.56806e-05	0.00290238
C17orf67	ENST00000397861	A_24_P583040	6.19125	6.55361	0.362365	8.75557e-05	0.00780131
C5orf41	NM_153607	A_23_P404606	10.2621	10.6242	0.362101	0.00145192	0.0401691
SDF2	NM_006923	A_23_P107313	8.36822	8.73026	0.362042	6.32009e-05	0.00653505
VAT1	NM_006373	A_23_P26954	11.0401	11.4006	0.360579	0.00158317	0.0420614
UXT	NM_004182	A_23_P159663	11.2603	11.6208	0.360559	4.2716e-06	0.00130072
ENAH	NM_001008493	A_23_P51397	11.0529	11.4131	0.360244	0.00204906	0.0492099
NR1H3	NM_005693	A_33_P3237775	9.4387	9.79895	0.360243	9.7122e-05	0.00832169
A_24_P340976	A_24_P340976	A_24_P340976	11.1341	11.4939	0.359809	6.10886e-05	0.00641565
EEF1A1	NM_001402	A_32_P44316	11.8298	12.1895	0.35972	0.000592803	0.0244281
RPS19BP1	NM_194326	A_24_P740705	10.4789	10.8382	0.359347	1.266e-07	0.000151176
GNA12	NM_007353	A_23_P215265	8.12649	8.48565	0.359163	2.29025e-05	0.00368884
C20orf196	NM_152504	A_33_P3275510	7.61121	7.97036	0.359156	0.000125535	0.00977434
PINK1	NM_032409	A_23_P23194	10.8291	11.1882	0.359034	0.00037387	0.0186667
HBP1	NM_012257	A_23_P215787	8.63724	8.99591	0.358667	2.08323e-05	0.00348421
SLC39A8	NM_022154	A_23_P41424	7.97017	8.3288	0.358626	0.00123751	0.036304
A_24_P152356	A_24_P152356	A_24_P152356	11.3011	11.6593	0.358225	0.000243231	0.0141226
C9orf114	NM_016390	A_23_P9392	7.11913	7.4771	0.357972	0.000205116	0.0129169
FAM134A	NM_024293	A_23_P142688	8.06773	8.42545	0.357718	0.000454799	0.020702
ENST00000399541	ENST00000399541	A_33_P3309110	7.96952	8.32682	0.357302	0.000303937	0.01653
YIPF1	NM_018982	A_23_P200239	9.31406	9.67104	0.356978	0.000157263	0.0110315
BRMS1	NM_001024957	A_33_P3367017	7.10962	7.46528	0.355656	3.47654e-05	0.00481285
CASK	NM_003688	A_24_P288722	6.86464	7.21951	0.354862	0.000563652	0.0235455
RPL29	NM_000992	A_23_P257609	11.8148	12.1691	0.35435	0.000131104	0.00998237
CCT3	NM_005998	A_23_P160631	12.182	12.5361	0.354094	3.49179e-05	0.00481408
RPSA	NM_002295	A_24_P349743	11.4389	11.7928	0.353922	0.000274059	0.0153537
EEF1A1	NM_001402	A_32_P47701	11.1164	11.4688	0.352474	0.00107857	0.0334552
SSR1	NM_003144	A_33_P3396692	9.57509	9.92716	0.352071	7.40756e-05	0.00725638
ZNF790	NM_206894	A_33_P3423401	7.25318	7.60488	0.351696	0.000401352	0.0194782
C4orf52	NM_001145432	A_24_P341222	8.89061	9.24215	0.351537	6.45195e-05	0.0066102
MXI1	NM_005962	A_33_P3263902	8.28445	8.63583	0.351385	0.00149008	0.0408181
SC65	NM_006455	A_33_P3257030	8.78446	9.13576	0.351299	0.00210319	0.0499369
ARL2	NM_001667	A_23_P98252	10.1548	10.5059	0.351012	7.32067e-05	0.00721345
KIAA0226	NM_001145642	A_23_P304171	10.0229	10.3737	0.350818	0.000187025	0.0122139
PGCP	NM_016134	A_23_P256735	9.5458	9.89646	0.350661	0.00113044	0.034429
RPS10	NM_001014	A_32_P14894	13.2644	13.6147	0.35031	2.1369e-06	0.000855046
EIF1AD	NM_032325	A_32_P749354	9.2776	9.62763	0.350032	0.000333249	0.0176097
C6orf129	NM_138493	A_23_P133770	8.82252	9.17223	0.349709	4.54672e-05	0.00546192
C2orf24	NM_015680	A_24_P128683	8.35262	8.70143	0.348811	0.000153993	0.0109303
A_33_P3255782	A_33_P3255782	A_33_P3255782	13.1229	13.4716	0.348692	5.1063e-06	0.00140498
NUBP2	NM_012225	A_23_P49082	8.98236	9.33068	0.348328	0.00178718	0.0450519
C16orf72	NM_014117	A_32_P4403	9.44837	9.79645	0.348087	3.98203e-05	0.00520595
RP2	NM_006915	A_23_P22433	8.25878	8.60659	0.347806	0.00094936	0.0310904
LOC388965	NR_003663	A_32_P18250	9.69052	10.038	0.347512	3.66408e-05	0.00492988
NPR2	NM_003995	A_23_P123622	7.35155	7.69875	0.3472	0.000493831	0.0216688
P4HB	NM_000918	A_23_P107412	9.45033	9.79692	0.34659	7.68298e-05	0.00737522
RPS7P5	AK098605	A_24_P15765	11.4855	11.8317	0.346229	0.00137284	0.0388033
GALNTL4	NM_198516	A_23_P139418	8.4995	8.84515	0.345646	0.00196106	0.0477183
RPS15A	NM_001019	A_32_P14744	12.7306	13.0757	0.345031	8.4097e-06	0.00182495
SOS1	NM_005633	A_33_P3356406	7.92136	8.26589	0.344529	0.000337169	0.0177291
A_24_P161355	A_24_P161355	A_24_P161355	13.1071	13.4516	0.344489	8.4433e-06	0.00182495
CPNE1	NM_152930	A_33_P3290888	9.6676	10.0117	0.344137	0.000502657	0.0218418
A_24_P375683	A_24_P375683	A_24_P375683	9.90468	10.2487	0.343988	0.000425392	0.0199811
EEF1DP3	BC125059	A_33_P3567512	8.0725	8.41622	0.343721	9.81132e-05	0.00836384
RPS15A	NM_001019	A_24_P221366	12.9779	13.3212	0.343309	1.18111e-05	0.00237592
RPL29	NM_000992	A_33_P3366039	9.41921	9.76224	0.343031	0.00106731	0.0332316
AK124741	AK124741	A_24_P392713	11.8348	12.1771	0.342264	0.00115438	0.0348136
FANCC	NM_000136	A_23_P32021	7.26264	7.60392	0.341283	0.00122629	0.0360378
B4GALT3	NM_003779	A_33_P3335999	8.09003	8.43001	0.339976	4.30789e-05	0.00538518
RPL13A	NM_012423	A_33_P3340060	12.8649	13.2045	0.33961	1.35078e-05	0.00254236
SELK	NM_021237	A_23_P364517	11.9546	12.2942	0.339581	6.2494e-06	0.00157657
LRP10	NM_014045	A_24_P99216	7.11656	7.45564	0.339082	9.30114e-05	0.00817866
TRIM4	NM_033017	A_23_P500601	9.55637	9.89544	0.339073	0.00151994	0.0411648
LOC100131355	AK124217	A_33_P3254751	6.61544	6.95448	0.339037	0.000807348	0.0284713
BCDIN3D	NM_181708	A_23_P338233	7.93784	8.27649	0.338651	9.6446e-06	0.00204502
GHRLOS	NR_004431	A_24_P208737	6.87776	7.21638	0.338616	0.00134351	0.0384046
FBXO8	NM_012180	A_23_P136012	8.40659	8.74441	0.337818	0.000972375	0.0314766
NAP1L1	NM_139207	A_23_P53646	11.9609	12.2986	0.337652	7.51528e-05	0.00728725
C10orf104	NM_173473	A_33_P3216955	7.60632	7.94397	0.337649	0.00136211	0.038738
CALCRL	NM_005795	A_33_P3306103	6.96177	7.29923	0.337455	0.00129601	0.0374771
POLR2F	NM_021974	A_33_P3318960	10.5407	10.8776	0.336907	2.4069e-05	0.00382161
PDLIM5	NM_001011516	A_33_P3336925	7.78312	8.11997	0.336843	0.000619612	0.0249498
SNRNP48	NM_152551	A_33_P3404448	7.13292	7.46946	0.336542	0.000194931	0.0126073
RPL17	NM_000985	A_32_P158746	12.2516	12.588	0.336448	8.48781e-05	0.00763966
CPNE1	NM_152930	A_33_P3262205	9.77395	10.1101	0.336189	0.000486799	0.0215724
A_24_P350307	A_24_P350307	A_24_P350307	10.7116	11.0475	0.335908	0.000108213	0.0087994
TXNDC12	NM_015913	A_23_P200199	8.14916	8.48496	0.335793	0.00127508	0.037146
CHST7	NM_019886	A_23_P319617	7.51898	7.8546	0.335625	0.000241393	0.0140786
AK130930	AK130930	A_24_P195794	11.7069	12.0425	0.335514	0.000920102	0.0306719
DUSP9	NM_001395	A_24_P417189	6.8795	7.21492	0.335414	0.000875711	0.0297811
ENST00000427438	ENST00000427438	A_33_P3223874	14.1779	14.5131	0.335244	2.55666e-05	0.00398388
CCDC102A	NM_033212	A_23_P65983	6.53753	6.87242	0.334897	0.000698292	0.0264227
KHNYN	NM_015299	A_24_P170763	9.31154	9.64592	0.33438	0.000445703	0.0204267
FXR1	NM_001013439	A_23_P132784	10.7742	11.1081	0.333983	0.000507663	0.0219872
RAB3IP	NM_175623	A_23_P128174	10.979	11.3128	0.333883	0.00203126	0.0489929
COMMD6	NM_203497	A_32_P114215	11.3301	11.6634	0.333288	7.29038e-05	0.00720593
ELMOD3	NM_032213	A_33_P3297305	6.79746	7.13061	0.33315	0.000127901	0.00982784
CALCRL	NM_005795	A_33_P3306110	6.77358	7.10563	0.332054	0.000605481	0.0246454
BBS10	NM_024685	A_24_P181149	8.45368	8.78565	0.331973	0.000489787	0.0216475
ZNF615	NM_198480	A_33_P3327961	8.31568	8.64743	0.33175	0.000137338	0.0102247
ZRSR2	NM_005089	A_23_P85053	9.98958	10.3211	0.331505	0.000402331	0.0194782
PSME1	NM_006263	A_23_P151614	7.25273	7.58392	0.331194	0.000837446	0.0291039
FAM160B2	NM_022749	A_33_P3269879	6.82695	7.15801	0.331053	0.000228071	0.0137425
FAM32A	NM_014077	A_23_P50331	7.93406	8.26511	0.331043	0.000942764	0.0310172
A_24_P383330	A_24_P383330	A_24_P383330	11.4721	11.8031	0.330984	0.000175748	0.0116969
SPHK2	NM_020126	A_33_P3332666	7.48834	7.81927	0.330932	0.00014075	0.0103635
MAD2L2	NM_006341	A_23_P23206	9.09593	9.4268	0.330873	0.000312757	0.0168728
ITSN1	NM_001001132	A_23_P252962	6.66304	6.99383	0.330787	0.00092854	0.0307301
AKAP8L	NM_014371	A_23_P153767	9.55955	9.88921	0.32966	0.00128208	0.0372621
C7orf60	NM_152556	A_24_P303647	6.77263	7.10207	0.329441	0.00150924	0.0409745
PDCD2	NM_002598	A_23_P145146	8.85608	9.18501	0.328931	1.153e-06	0.000674982
TAOK3	NM_016281	A_33_P3346102	9.01545	9.34408	0.328628	0.000752021	0.0274447
C6orf129	NM_138493	A_33_P3260100	11.0062	11.3343	0.328167	0.00031754	0.0170212
DHX38	NM_014003	A_23_P38011	8.01521	8.3431	0.327897	0.00119395	0.035463
LIX1L	NM_153713	A_23_P342744	6.99885	7.3267	0.327852	6.86e-08	0.000104537
RPL39	NM_001000	A_33_P3344332	11.4135	11.7412	0.327749	0.00173288	0.0443846
VWA1	NM_022834	A_24_P122746	6.77874	7.10627	0.327534	0.0013102	0.0376129
RPL6	NM_001024662	A_23_P151321	13.2369	13.5635	0.326563	7.2124e-06	0.00171369
PPP2R5A	NM_006243	A_24_P251221	8.85715	9.18354	0.32639	2.85288e-05	0.00428597
A_24_P289188	A_24_P289188	A_24_P289188	11.0962	11.4221	0.325969	0.000299356	0.0163339
PRKD2	NM_016457	A_23_P78802	7.27391	7.59964	0.325731	4.74416e-05	0.00558232
ACVR1	NM_001105	A_23_P79221	7.41899	7.7442	0.325204	0.00125633	0.0367405
SPG20	NM_015087	A_33_P3352877	8.38089	8.70605	0.325163	0.00178194	0.0450289
RPS10	NM_001014	A_23_P318646	13.446	13.7706	0.324601	5.8333e-06	0.00155102
CCND3	NM_001760	A_23_P361773	8.60049	8.92495	0.32446	0.000400315	0.0194782
FKBP15	NM_015258	A_32_P224149	8.75181	9.07556	0.323745	0.00097221	0.0314766
AIP	NM_003977	A_23_P75380	10.5893	10.9129	0.323619	6.2378e-06	0.00157657
VMA21	NM_001017980	A_23_P96542	8.60635	8.9299	0.323555	0.00145577	0.0402402
RPS19	NM_001022	A_24_P134074	14.4757	14.7988	0.32316	1.9502e-06	0.000835914
A_24_P110082	A_24_P110082	A_24_P110082	11.1412	11.4643	0.323074	0.00130687	0.0376121
ENST00000370562	ENST00000370562	A_24_P280803	13.1772	13.4998	0.322665	0.00018508	0.0121521
TULP3	NM_003324	A_33_P3405789	9.74323	10.0659	0.322641	0.000231904	0.0137997
CENPB	NM_001810	A_23_P257905	9.48528	9.80791	0.322627	0.00108203	0.0334854
CABC1	NM_020247	A_23_P85598	8.4269	8.74928	0.322379	2.0904e-05	0.00348421
NEDD1	NM_152905	A_33_P3260016	9.75505	10.0773	0.322252	0.000787534	0.028068
METTL13	NM_015935	A_23_P201672	9.63558	9.95773	0.32215	8.075e-07	0.000550924
SOD1	NM_000454	A_23_P154840	14.6109	14.933	0.322117	0.000204216	0.0129169
IPO5	NM_002271	A_23_P205007	9.09089	9.41182	0.320925	0.000239821	0.0140709
CCNG1	NM_004060	A_33_P3232277	7.58558	7.9063	0.320717	0.000237794	0.014001
C1orf156	NM_033418	A_23_P85726	7.35585	7.67637	0.320522	0.00101075	0.0323113
ZNF765	NM_001040185	A_33_P3289422	8.97544	9.29581	0.320376	0.000396483	0.0193898
MTCH1	NM_014341	A_33_P3379157	11.2151	11.5349	0.319852	0.00101858	0.0324685
RPL15	NM_002948	A_24_P257359	13.4124	13.7317	0.319302	6.98504e-05	0.00704858
TMEM109	NM_024092	A_24_P47467	8.97062	9.28987	0.31925	0.00120829	0.0357561
CHCHD4	NM_144636	A_23_P428849	9.22352	9.54265	0.31913	7.84891e-05	0.00742809
RSU1	NM_012425	A_33_P3390335	7.84363	8.16251	0.318879	3.23216e-05	0.00464738
CHDH	NM_018397	A_23_P357185	7.6538	7.97202	0.318221	0.000348593	0.0179947
AHCY	NM_000687	A_24_P57367	7.68155	7.99961	0.318065	0.00128924	0.0374138
SLC2A11	NM_030807	A_33_P3268649	6.76083	7.07845	0.31762	0.000278322	0.0155406
GAN	NM_022041	A_23_P88873	7.15701	7.47438	0.317374	0.000432546	0.0201546
RELA	NM_021975	A_33_P3209433	7.72925	8.04634	0.317094	6.72802e-05	0.00687201
C5orf54	NM_022090	A_24_P166311	7.84157	8.15854	0.316976	0.000455655	0.0207128
TMED10	NM_006827	A_24_P917833	10.7855	11.1021	0.316531	0.000616042	0.0249133
FADD	NM_003824	A_23_P86917	9.63984	9.95607	0.316226	9.41266e-05	0.00819072
DVL1	NM_004421	A_23_P347432	8.05269	8.36879	0.316101	0.000438472	0.0202476
GNB2L1	NM_006098	A_23_P41716	11.262	11.5777	0.315661	0.000394365	0.0193709
RPL7	NM_000971	A_32_P31182	10.1666	10.4822	0.315603	0.000797078	0.0282579
A_33_P3264955	A_33_P3264955	A_33_P3264955	9.41066	9.72553	0.314863	0.0010523	0.0330505
E2F6	NM_198256	A_32_P12610	7.23455	7.54912	0.314573	0.000533723	0.022743
ANKRD42	BX648690	A_33_P3278144	12.6985	13.0124	0.313929	0.000385853	0.0190559
A_24_P401100	A_24_P401100	A_24_P401100	13.3082	13.6221	0.313873	4.56639e-05	0.00546192
BM701600	BM701600	A_24_P273203	12.9524	13.2661	0.313721	0.000203938	0.0129169
MEF2B	NM_001145785	A_33_P3344406	8.11615	8.42951	0.313358	0.00162476	0.0426418
A_33_P3293734	A_33_P3293734	A_33_P3293734	8.12635	8.4397	0.313352	3.12423e-05	0.00453108
NUDC	NM_006600	A_23_P74653	10.3645	10.6778	0.313267	0.000943474	0.0310172
ST13	NM_003932	A_33_P3390739	10.358	10.6711	0.313155	0.00175445	0.044724
MYL6	NM_079423	A_24_P56130	12.2185	12.5312	0.31272	0.000514756	0.0222234
ABHD12	NM_015600	A_23_P149494	8.79307	9.10564	0.312569	0.00171303	0.0440107
TMED5	NM_016040	A_24_P54178	10.1204	10.4328	0.312412	0.00180257	0.0452358
ZBTB40	NM_001083621	A_23_P387523	9.40293	9.71518	0.312251	0.002063	0.0494736
RPLP0P5	CR621923	A_24_P16340	11.1516	11.4639	0.312214	0.00154539	0.0415519
HTRA2	NM_145074	A_24_P336957	8.74561	9.05741	0.311799	1.9711e-06	0.000835914
COBL	NM_015198	A_33_P3725227	10.6599	10.9716	0.311726	0.00138229	0.0389483
ZNF664	NM_152437	A_23_P359655	11.2257	11.5372	0.311441	0.000946738	0.0310348
ZNF358	NM_018083	A_24_P19175	8.41375	8.72494	0.311195	0.00171062	0.0439825
A_33_P3385387	A_33_P3385387	A_33_P3385387	9.04487	9.35595	0.311086	0.000870181	0.029657
RNF114	NM_018683	A_24_P82957	8.39113	8.70221	0.311083	0.00124161	0.0363924
NDUFA4L2	NM_020142	A_23_P9614	6.65075	6.96106	0.31031	0.000864742	0.0295618
ANKRD57	NM_023016	A_33_P3219785	9.18524	9.49548	0.310248	0.000158528	0.0110651
HCCA2	NM_053005	A_23_P64499	9.07214	9.38237	0.310233	8.05707e-05	0.0075481
RPS10	NM_001014	A_24_P418619	12.7278	13.0376	0.309713	2.75561e-05	0.00422181
MAX	NM_145113	A_23_P205549	11.3467	11.6559	0.309224	0.000338684	0.0177291
ZNF320	NM_207333	A_33_P3273238	7.32776	7.63666	0.308899	0.000405341	0.0195536
RPS19	NM_001022	A_23_P119130	13.5072	13.8159	0.308729	8.32405e-05	0.00762037
CBFB	NM_001755	A_23_P113634	9.7883	10.0967	0.30842	0.000856152	0.0294183
STAG2	NM_001042749	A_24_P66125	9.53466	9.84308	0.308413	7.20383e-05	0.00718282
SSR2	NM_003145	A_24_P282578	9.34213	9.65051	0.30838	0.000236035	0.0139219
MUTED	NM_201280	A_24_P106591	8.43105	8.7391	0.308052	0.000733797	0.0271088
TRMT112	NM_016404	A_23_P12992	12.3088	12.6164	0.307589	0.000175965	0.0116969
RPLP0	NM_053275	A_23_P204472	12.1619	12.4694	0.307499	0.000184936	0.0121521
A_24_P50157	A_24_P50157	A_24_P50157	12.9599	13.2673	0.307435	0.001612	0.0425263
ZNF816A	NM_001031665	A_33_P3399019	6.82093	7.12812	0.307188	8.74134e-05	0.00780131
LIX1L	ENST00000369308	A_24_P687594	7.13411	7.44129	0.307185	0.000222137	0.013531
RPS2	NM_002952	A_24_P135902	13.2702	13.5773	0.307101	0.00186558	0.0461259
TAZ	NM_000116	A_23_P62371	7.58851	7.89561	0.307094	0.00147236	0.0405316
MRPL34	NM_023937	A_24_P125690	10.7897	11.0966	0.306968	6.30483e-05	0.00653505
ARAP1	NM_001040118	A_24_P398432	8.71446	9.02138	0.306917	0.00039085	0.019228
GNAI3	NM_006496	A_33_P3419339	7.22775	7.5342	0.306456	0.00148675	0.0407604
HSCB	NM_172002	A_23_P40588	7.65641	7.96272	0.30631	0.000612506	0.0248428
OBFC1	NM_024928	A_23_P46852	8.24876	8.55431	0.305554	0.000492741	0.0216688
A_24_P349636	A_24_P349636	A_24_P349636	12.7409	13.0463	0.305464	0.00122591	0.0360378
LOC391358	XM_001723285	A_24_P280926	10.9344	11.2395	0.305156	0.000332745	0.0176097
IL6ST	NM_175767	A_33_P3287338	9.25549	9.56064	0.305145	0.000748664	0.0273519
HDLBP	NM_005336	A_23_P131417	9.77668	10.0815	0.304848	1.62292e-05	0.00297109
FBXW5	NM_018998	A_23_P112397	9.72271	10.0274	0.304725	0.000913433	0.0305477
CNIH4	NM_014184	A_23_P200507	10.2941	10.5985	0.304378	1.32767e-05	0.00252962
TOMM6	NM_001134493	A_23_P214474	10.4851	10.7893	0.304218	7.52609e-05	0.00728725
A_24_P58881	A_24_P58881	A_24_P58881	14.0956	14.3997	0.3041	6.9098e-06	0.00165708
VPS37D	NM_001077621	A_33_P3293573	9.6226	9.92646	0.30386	0.000232777	0.0138271
CCDC50	NM_178335	A_24_P910733	8.02475	8.32846	0.303715	0.000401235	0.0194782
RPS3A	NM_001006	A_32_P58074	13.1229	13.4256	0.302669	0.000768285	0.027617
AZI2	NM_022461	A_33_P3322283	8.23594	8.53833	0.302395	0.00201548	0.0486826
RPS15A	NM_001019	A_33_P3241582	13.4877	13.7897	0.30202	6.6616e-06	0.00162903
HSBP1	NM_001537	A_33_P3244181	11.3535	11.6553	0.301803	9.54818e-05	0.00827629
FUNDC2	NM_023934	A_33_P3394615	9.01409	9.31562	0.301527	0.00137367	0.0388033
PPM1M	NM_144641	A_33_P3407835	6.802	7.10342	0.301418	0.00111063	0.033894
PHF3	NM_015153	A_23_P70371	9.70047	10.0013	0.300812	0.00149721	0.0409131
IL6ST	NM_175767	A_33_P3233834	8.41688	8.71752	0.300636	0.0014207	0.039676
RPL29	NM_000992	A_32_P162004	12.9387	13.2388	0.300091	0.000217024	0.0133857
MPG	NM_002434	A_24_P48162	9.01294	9.31225	0.299304	0.000394977	0.0193709
ZNF250	NM_021061	A_24_P205019	7.38018	7.67921	0.299036	0.00113607	0.0345002
TBPL1	NM_004865	A_23_P168276	9.00356	9.30223	0.298675	0.000680014	0.0262766
A_33_P3262890	A_33_P3262890	A_33_P3262890	12.2735	12.571	0.297545	1.23551e-05	0.00242059
LOC728675	ENST00000434166	A_33_P3382125	7.41532	7.7125	0.297179	0.000887716	0.0300388
ZNF248	NM_021045	A_23_P35343	6.93961	7.23659	0.296977	0.000727959	0.0270828
JTB	NM_006694	A_23_P34983	11.76	12.0563	0.296308	0.000152365	0.0108377
SAP30L	NM_024632	A_23_P368101	8.70615	9.00232	0.296163	0.000111346	0.00892418
MORC2	NM_014941	A_24_P100234	6.58878	6.88465	0.295872	0.000340963	0.0177812
POLR1D	NM_015972	A_23_P36928	8.49874	8.7944	0.295661	0.00140813	0.0394772
AFAP1L1	NM_152406	A_32_P167239	6.85444	7.1491	0.29466	0.00121919	0.0359872
TBL1X	NM_005647	A_33_P3347161	7.15961	7.45424	0.29463	0.000427628	0.0200369
ARPP19	NM_006628	A_24_P313262	9.79141	10.0855	0.294124	0.000879945	0.029838
CNOT4	NM_001008225	A_23_P156993	6.68294	6.97679	0.293845	0.000809356	0.0285121
BTBD7	NM_001002860	A_24_P721898	8.45194	8.74571	0.293772	0.000857862	0.0294468
DCAF7	NM_005828	A_24_P916141	9.2246	9.51753	0.292934	2.45674e-05	0.00386963
ZNF525	NR_003699	A_32_P98348	12.0321	12.3248	0.292704	0.00120188	0.0356015
SCARNA10	NR_004387	A_33_P3363120	6.1901	6.4826	0.292503	0.00179561	0.0451292
SLMAP	NM_007159	A_24_P942773	8.51874	8.81124	0.292501	0.000298575	0.0163179
THAP11	NM_020457	A_24_P365954	6.96101	7.25337	0.292352	0.00157762	0.0420138
C10orf26	NM_017787	A_24_P64362	8.01001	8.302	0.291989	5.43554e-05	0.00596629
IMMP2L	NM_032549	A_33_P3213377	7.77825	8.07005	0.291805	0.00108549	0.0335479
RUFY1	NM_025158	A_33_P3253799	7.65471	7.94645	0.29174	0.00102248	0.0324791
TMEM43	NM_024334	A_23_P121196	8.19011	8.4818	0.291692	5.10464e-05	0.00589709
RPL23AP53	NR_003572	A_24_P323628	11.415	11.7065	0.291453	0.00121115	0.0357813
MOBKL3	NM_015387	A_23_P210274	8.37234	8.66371	0.291363	0.00114517	0.0346572
GALK1	NM_000154	A_23_P141126	7.52165	7.81262	0.290969	0.00116353	0.0349914
SNX2	NM_003100	A_23_P7697	10.591	10.8819	0.290923	0.000656159	0.0257107
CXXC1	NM_014593	A_23_P141779	8.08489	8.37579	0.290902	0.000540336	0.0229434
A_24_P332482	A_24_P332482	A_24_P332482	11.5196	11.8103	0.290787	0.00155499	0.0416461
RPS27L	NM_015920	A_23_P14734	12.3396	12.6302	0.290504	5.6899e-05	0.00612936
C12orf23	NM_152261	A_23_P410613	9.44277	9.73298	0.290215	0.00135261	0.0385333
YY1	NM_003403	A_33_P3315600	10.2012	10.491	0.289783	4.38972e-05	0.00542673
A_24_P547010	A_24_P547010	A_24_P547010	12.8296	13.1168	0.287212	0.000108114	0.0087994
MYO10	NM_012334	A_33_P3341424	7.53811	7.82521	0.287099	0.00158584	0.0420988
RPS3A	NM_001006	A_32_P208178	14.5365	14.8231	0.286634	0.00010621	0.00875379
ENST00000428120	ENST00000428120	A_24_P49214	7.28991	7.57605	0.286138	0.000344979	0.0178909
UBFD1	NM_019116	A_23_P15123	8.45529	8.7406	0.285313	0.000433921	0.0201626
NTAN1	NM_173474	A_23_P170498	8.79162	9.07656	0.284943	2.05219e-05	0.00347235
ZNF558	NM_144693	A_23_P28015	8.35895	8.64373	0.284775	0.000928009	0.0307301
LMAN2L	NM_030805	A_23_P142708	8.48991	8.77348	0.283563	0.000485413	0.021551
CKS1B	NM_001826	A_23_P45917	10.5503	10.8333	0.282999	0.000260084	0.0148692
MEIS3P1	NR_002211	A_32_P45168	10.326	10.6081	0.282073	0.0018069	0.045248
PSMG3	NM_032302	A_24_P21044	8.79272	9.07365	0.280933	0.00102298	0.0324791
DISP1	NM_032890	A_23_P201319	7.61663	7.8975	0.28087	0.00138445	0.0389764
PTOV1	NM_017432	A_24_P219808	10.8467	11.1272	0.280492	0.00164533	0.0429974
POR	NM_000941	A_24_P29723	8.47608	8.75621	0.280128	0.00117546	0.0351017
SERF2	NM_001018108	A_23_P106299	12.8636	13.1432	0.279585	0.000676223	0.0261603
NFATC3	NM_173164	A_23_P77440	7.06208	7.34163	0.27955	0.000353829	0.0181813
RPL19P12	NR_026660	A_24_P67308	13.7201	13.9996	0.279544	2.99638e-05	0.00443706
PYGO2	NM_138300	A_23_P411953	9.88762	10.166	0.278351	0.000626916	0.0251231
LOC100130285	XR_042383	A_33_P3411773	7.69588	7.97352	0.277646	0.0009797	0.0316508
ZNF384	NM_001039916	A_23_P204355	8.25578	8.53335	0.277567	0.000189768	0.0123209
ZNF614	NM_025040	A_33_P3268144	8.93414	9.21133	0.27719	0.0019893	0.0482239
ARMC7	NM_024585	A_23_P15375	7.6805	7.95738	0.27688	0.000546777	0.0231655
GNPDA1	NM_005471	A_23_P144622	6.89267	7.16949	0.276822	0.000132859	0.0100554
ENST00000304239	ENST00000304239	A_33_P3395396	9.78011	10.0553	0.275216	0.000739089	0.02718
RPL29	NM_000992	A_32_P204019	12.6868	12.9617	0.274812	0.00069011	0.0263386
SOCS4	NM_199421	A_33_P3349334	9.4761	9.75076	0.274655	0.000620529	0.0249567
HS1BP3	NM_022460	A_24_P139943	8.7922	9.06635	0.274156	0.00131254	0.0376479
UBE2W	NM_001001481	A_24_P346604	7.69479	7.96878	0.273992	0.00170163	0.043857
SFRS13A	NM_006625	A_32_P45493	9.6303	9.90424	0.27394	0.000943807	0.0310172
ZMAT5	NM_019103	A_23_P132248	7.33852	7.61226	0.27374	0.000313389	0.0168797
A_33_P3297277	A_33_P3297277	A_33_P3297277	14.2283	14.5016	0.273308	6.7862e-06	0.00164748
ZFP82	NM_133466	A_23_P416813	6.55978	6.83307	0.273287	0.000357199	0.0182538
CNOT4	NM_013316	A_23_P300781	9.13552	9.40826	0.272745	0.000635087	0.0252379
OGG1	NM_002542	A_23_P344392	6.86125	7.13398	0.272727	0.000465192	0.0210038
ZNF879	NM_001136116	A_24_P791669	7.02967	7.30222	0.272548	0.00156658	0.0418197
RPUSD2	NM_152260	A_23_P309850	8.91803	9.19051	0.272474	0.00207557	0.0495975
UBL5	NM_024292	A_23_P78563	12.7564	13.0289	0.272459	0.000126621	0.00977434
TMCC1	NM_001017395	A_32_P41065	10.0331	10.3049	0.271828	0.00142649	0.0396777
CREB3	NM_006368	A_23_P423389	8.63731	8.90887	0.271561	0.000574211	0.0238971
PROSC	NM_007198	A_23_P45166	9.45994	9.73123	0.271289	0.00109047	0.0336091
IFNAR1	NM_000629	A_33_P3277988	8.81032	9.08101	0.270693	0.00138087	0.0389409
NECAP2	NM_018090	A_23_P97296	9.8164	10.0867	0.270274	0.000142878	0.0104513
RPS14	NM_001025071	A_23_P81492	14.3431	14.6132	0.270158	0.000303664	0.01653
ENST00000368172	ENST00000368172	A_33_P3413821	6.0246	6.29436	0.269761	0.000763714	0.0275711
EIF2B4	NM_001034116	A_23_P154058	8.34157	8.61119	0.26962	0.00120923	0.0357561
RALA	NM_005402	A_24_P192262	9.04693	9.31477	0.267838	0.000217674	0.0133857
UQCC	NM_018244	A_23_P210948	7.64671	7.91338	0.266666	0.000148185	0.0106306
SSBP2	NM_012446	A_23_P33791	9.3477	9.61429	0.266584	0.000641437	0.0252657
CCT4	NM_006430	A_23_P102420	12.8407	13.1044	0.263777	0.00195208	0.0475972
SEC22A	NM_012430	A_23_P259874	7.68539	7.94898	0.263593	0.00203456	0.0490373
DCHS1	NM_003737	A_23_P98645	7.11676	7.37965	0.262883	0.000363544	0.0184343
DHRS13	NM_144683	A_23_P66719	7.57175	7.8343	0.26255	0.00111085	0.033894
RP3-377H14.5	NR_026972	A_32_P76811	12.0867	12.3485	0.261835	0.00080445	0.0284476
RPS16	NM_001020	A_23_P208850	14.5983	14.86	0.261645	1.53984e-05	0.00286742
RIC8A	NM_021932	A_24_P115971	7.91297	8.17435	0.261381	0.00155498	0.0416461
LEPR	NM_001003680	A_33_P3303449	6.66587	6.92629	0.26042	0.000728744	0.0270828
ZFR	NM_016107	A_23_P41818	10.0716	10.3311	0.259578	0.000215471	0.0133857
ZMPSTE24	NM_005857	A_23_P137427	11.108	11.3674	0.259439	0.000395489	0.0193709
ZNF473	NM_015428	A_24_P941376	6.10186	6.36116	0.259303	4.6055e-05	0.0054714
BAD	NM_004322	A_33_P3262043	9.85931	10.1185	0.25919	0.000890967	0.0300596
CCDC127	NM_145265	A_23_P41976	9.11109	9.3702	0.259107	6.0939e-06	0.00157657
NAIF1	NM_197956	A_24_P89911	7.92002	8.17878	0.258759	0.000815536	0.0286084
UBE2F	NM_080678	A_23_P39561	8.82329	9.08195	0.258666	0.000992438	0.0319392
ZDHHC7	NM_017740	A_23_P129389	8.50061	8.75888	0.258275	0.000701559	0.0264979
SLC7A6OS	NM_032178	A_23_P3562	8.48362	8.74184	0.258226	0.00103804	0.0327424
AF147412	AF147412	A_24_P58308	13.367	13.6235	0.256475	8.38037e-05	0.00762932
AI418341	AI418341	A_33_P3375673	13.4743	13.7304	0.256137	0.0015149	0.041095
A_24_P375599	A_24_P375599	A_24_P375599	13.5299	13.7859	0.256022	0.00122136	0.0360143
FCHSD2	NM_014824	A_33_P3217958	6.20441	6.46043	0.256018	0.000890552	0.0300596
RPSAP52	NR_026825	A_24_P465772	11.5375	11.7935	0.255989	0.00049763	0.0217645
PML	NM_033238	A_24_P207139	6.5649	6.82048	0.255582	0.00111014	0.033894
C2orf7	NM_032319	A_23_P131596	8.66394	8.91909	0.255144	0.000637507	0.0252456
NUDT1	NM_198949	A_23_P134295	10.6566	10.9117	0.255108	0.000761615	0.0275586
SIVA1	NM_006427	A_24_P116351	10.7758	11.0306	0.254812	0.000747445	0.0273519
RMND5B	NM_022762	A_33_P3258723	8.53858	8.79309	0.254506	0.000169271	0.0114564
PTAR1	NM_001099666	A_24_P75158	11.4464	11.7007	0.254251	0.00042989	0.0200867
ARL6IP6	NM_152522	A_23_P28169	8.56139	8.81545	0.254062	0.00182023	0.0454876
KCTD11	NM_001002914	A_23_P354027	7.72454	7.97797	0.253431	0.00118765	0.0353677
RP9	NM_203288	A_23_P255215	8.62215	8.8755	0.253349	0.00154209	0.0415158
IL6ST	NM_002184	A_23_P502470	9.39255	9.64586	0.253314	0.00188101	0.0462966
A_24_P187023	A_24_P187023	A_24_P187023	12.2205	12.4733	0.252844	0.000673233	0.0261107
EPC2	NM_015630	A_23_P359738	9.72522	9.97795	0.252727	0.000415854	0.0197336
TEX264	NM_015926	A_23_P41009	8.3038	8.55628	0.252478	0.00110166	0.0337762
A_33_P3771039	A_33_P3771039	A_33_P3771039	12.1905	12.4414	0.250864	0.000122478	0.00961649
MRPL36	NM_032479	A_24_P371758	9.54103	9.7906	0.249566	0.000230202	0.0137851
PTPN12	NM_002835	A_23_P8763	10.25	10.4994	0.249341	0.000913639	0.0305477
C9orf40	NM_017998	A_23_P43425	8.36586	8.61504	0.249183	0.00201767	0.0487004
NUDT5	NM_014142	A_23_P1199	9.43453	9.6837	0.249167	0.000518034	0.0222788
A_24_P186944	A_24_P186944	A_24_P186944	13.3719	13.6206	0.248702	0.000129792	0.00993437
KCTD20	NM_173562	A_23_P374351	8.61109	8.85978	0.248698	0.00204588	0.0491687
MFAP1	NM_005926	A_23_P14636	9.06901	9.31708	0.248072	0.000158866	0.0110651
ZNF561	NM_152289	A_33_P3359543	8.52386	8.76961	0.245749	0.000660132	0.0257739
A_33_P3353259	A_33_P3353259	A_33_P3353259	13.4244	13.6688	0.244451	0.000618822	0.0249498
RALGPS2	AK001106	A_33_P3291998	6.0213	6.26491	0.243619	0.00161766	0.0425595
FBXL4	NM_012160	A_23_P214739	9.21734	9.46047	0.243127	0.000923121	0.0307114
PREB	NM_013388	A_23_P91114	9.63728	9.88	0.24272	0.000365363	0.0184343
KDSR	NM_002035	A_23_P27367	8.7738	9.01625	0.242444	0.00150412	0.0409529
LOC100132831	NR_027761	A_32_P41496	7.11191	7.35421	0.242301	0.00164535	0.0429974
ZNF285A	NM_152354	A_23_P101319	6.63673	6.87817	0.241433	0.00090558	0.0304335
ZNF701	NM_018260	A_33_P3273272	6.41206	6.65347	0.24141	0.000527161	0.0225267
CYB5A	NM_148923	A_33_P3311076	9.78313	10.0245	0.241325	0.000598514	0.0245427
A_33_P3389540	A_33_P3389540	A_33_P3389540	13.0347	13.276	0.241302	0.000773176	0.0276741
SDHD	NM_003002	A_23_P138967	9.21331	9.45444	0.241131	0.00084727	0.0292631
RPL35	NM_007209	A_32_P72940	12.5344	12.7754	0.240934	0.0015226	0.0412027
ETV2	NM_014209	A_33_P3370848	6.34195	6.58276	0.240809	0.000911447	0.0305353
A_33_P3234641	A_33_P3234641	A_33_P3234641	14.0352	14.276	0.240744	0.000500203	0.0217917
STRA13	NM_144998	A_24_P65507	11.3996	11.6402	0.240584	0.000458276	0.0208037
PCDH18	NM_019035	A_33_P3225760	6.08251	6.32255	0.240036	5.14858e-05	0.00590712
RPSA	NM_002295	A_24_P780052	11.8997	12.1396	0.239976	0.000423589	0.0199593
RSF1	NM_016578	A_23_P139388	8.455	8.69485	0.239849	0.000243189	0.0141226
RPL10	NM_006013	A_23_P217666	14.1523	14.3903	0.238058	0.000366664	0.0184522
REXO2	NM_015523	A_23_P150365	10.7406	10.9783	0.237737	0.000952583	0.031135
CCDC90A	NM_001031713	A_33_P3324086	10.8264	11.0634	0.23694	0.000594926	0.0244855
A_24_P203726	A_24_P203726	A_24_P203726	14.5357	14.7724	0.236726	2.1419e-05	0.00355237
A_24_P40795	A_24_P40795	A_24_P40795	12.6451	12.8816	0.236543	0.00162403	0.0426418
C6orf125	NM_032340	A_23_P156739	10.2641	10.4994	0.235374	0.000861069	0.0295267
RPL30	NM_000989	A_23_P123330	14.1181	14.3532	0.235105	5.33284e-05	0.00596629
ZNF175	NM_007147	A_23_P332374	7.32966	7.56253	0.232866	0.00160792	0.0424832
FAM120A	NM_014612	A_24_P941505	9.52002	9.75286	0.232841	0.000597881	0.0245427
BFAR	NM_016561	A_23_P65963	8.79762	9.02883	0.231204	0.00182767	0.0455506
KEAP1	NM_203500	A_23_P119141	9.49987	9.73048	0.230608	0.000897395	0.030246
MRPL27	NM_016504	A_23_P49768	9.93306	10.1636	0.230539	0.000157395	0.0110315
A_33_P3328837	A_33_P3328837	A_33_P3328837	12.916	13.1464	0.230375	0.00178207	0.0450289
EI24	NM_004879	A_24_P4661	9.20698	9.43729	0.230308	0.00150478	0.0409529
MRPS14	NM_022100	A_23_P62731	8.8878	9.11788	0.230079	0.000735214	0.0271088
ZNF137	NR_023311	A_23_P208238	7.45065	7.67986	0.229208	0.000772902	0.0276741
RPS27A	NM_002954	A_32_P24581	14.5538	14.7824	0.228575	7.09991e-05	0.00712159
ZNF22	NM_006963	A_23_P202458	9.64617	9.87454	0.228376	0.000449286	0.0205347
ZNF616	NM_178523	A_33_P3269806	7.00748	7.23509	0.227608	0.00103191	0.0326143
TUBD1	NM_016261	A_23_P26895	8.01427	8.24141	0.227146	0.00163268	0.0427664
RFX7	NM_022841	A_33_P3210338	8.85936	9.08582	0.226458	0.00134627	0.038418
ZNF74	NM_003426	A_33_P3291636	6.82968	7.05573	0.226055	0.00136827	0.0387526
ITGB1BP1	ENST00000360635	A_33_P3216227	5.83024	6.05618	0.225939	0.000604851	0.0246454
ILK	NM_001014795	A_23_P105066	9.18658	9.41183	0.225247	0.00126246	0.0368101
SLC25A39	NM_016016	A_23_P100764	9.86415	10.0893	0.225115	0.00046626	0.0210237
C11orf17	NM_182901	A_23_P53152	8.06733	8.29235	0.225014	0.00012729	0.00980336
ZNF623	NM_001082480	A_33_P3209030	6.20693	6.43161	0.224682	0.00016659	0.0113213
SLC35C1	NM_018389	A_23_P202720	8.37386	8.59813	0.224279	0.00205734	0.0493733
RPSA	NM_002295	A_24_P358164	12.1241	12.3483	0.224222	0.000377731	0.0188226
ZNF32	NM_001005368	A_23_P98057	8.12691	8.35017	0.223264	0.000214341	0.0133857
RAF1	NM_002880	A_23_P40952	9.29203	9.51494	0.222918	0.000106994	0.00875379
KIAA1429	NM_015496	A_24_P223604	10.8914	11.1136	0.222193	0.000218269	0.0133928
RPS29	NM_001032	A_33_P3270852	14.0208	14.2419	0.221119	0.000877424	0.0297826
GPR172A	NM_024531	A_33_P3274696	10.6605	10.8812	0.22065	0.000805046	0.0284476
CR619482	CR619482	A_24_P136211	13.234	13.454	0.220028	0.00105839	0.0332006
RPL13A	NM_012423	A_23_P90143	15.3182	15.5381	0.219969	6.21428e-05	0.00650597
ZNF436	NM_001077195	A_33_P3327842	6.04109	6.26063	0.219539	0.00139693	0.0392616
C18orf55	NM_014177	A_23_P78410	10.7873	11.0063	0.218979	0.000772434	0.0276741
SERBP1	NM_001018067	A_23_P337424	6.69518	6.91302	0.217839	0.0019272	0.0471742
SETX	NM_015046	A_24_P940921	9.21039	9.4276	0.217208	0.00136408	0.0387518
C7orf28A	NM_015622	A_33_P3333863	8.3901	8.60574	0.215647	0.00110195	0.0337762
UBAC1	NM_016172	A_23_P60324	10.6875	10.8997	0.212117	0.00013845	0.0102618
MFAP3	NM_005927	A_33_P3374463	6.97606	7.18545	0.209386	0.00147864	0.0406712
RPL34	NM_033625	A_24_P188878	13.7573	13.9662	0.208867	0.000433277	0.0201606
CTNNBL1	NM_030877	A_23_P68401	7.55555	7.76403	0.20847	0.000413231	0.019637
hCG_2014417	NR_027032	A_24_P417935	6.59562	6.80394	0.20832	0.00106254	0.0332316
EDEM3	NM_025191	A_24_P208045	10.3059	10.5137	0.207788	0.00113802	0.034503
RNF7	NM_014245	A_23_P109768	10.3163	10.5235	0.207256	0.000163781	0.0111751
EEF1G	NM_001404	A_23_P13344	13.8512	14.0584	0.207241	0.00209558	0.0498573
ZNF671	NM_024833	A_33_P3283992	6.13583	6.34266	0.206824	0.00106416	0.0332316
MIR155HG	NR_001458	A_32_P108156	5.98181	6.18831	0.206502	0.000941358	0.0310172
UBE2A	NM_003336	A_23_P148446	10.3108	10.5172	0.206398	0.00206909	0.0495487
PLOD1	NM_000302	A_33_P3358824	6.04457	6.25093	0.206364	0.00010557	0.00875379
PABPC4L	NM_001114734	A_32_P123514	6.20448	6.40767	0.203193	0.000903692	0.0304276
RPL13A	NM_012423	A_24_P272061	14.1848	14.3874	0.202668	0.000133458	0.0100701
RPL26L1	NM_016093	A_32_P205553	9.83726	10.0395	0.20225	0.000747448	0.0273519
RIC8B	NM_018157	A_23_P64932	6.39478	6.59677	0.201991	0.000222588	0.0135338
FAM189B	NM_006589	A_33_P3359157	6.47332	6.67345	0.200129	0.00172143	0.044125
RPS7	NM_001011	A_23_P141549	14.6319	14.8317	0.199801	0.000166599	0.0113213
METTL12	NM_001043229	A_24_P804667	6.98489	7.18387	0.198973	0.000219067	0.0134171
ZNF235	NM_004234	A_33_P3418055	6.53226	6.73062	0.198361	0.000241634	0.0140786
CASP3	NM_004346	A_23_P92410	9.81457	10.0113	0.196712	0.00167133	0.0434728
TMEM11	NM_003876	A_23_P107036	9.6221	9.8187	0.196601	0.000491195	0.0216688
FAM115A	NM_014719	A_33_P3423830	7.08718	7.28102	0.193836	0.000735536	0.0271088
RPS17	NM_001021	A_24_P418418	14.549	14.742	0.192996	0.00072076	0.0269496
RPS10	NM_001014	A_23_P356484	14.9506	15.1422	0.19162	0.0003198	0.0170604
ENST00000383346	ENST00000383346	A_33_P3257671	6.41155	6.59969	0.188133	0.00195175	0.0475972
STK38	NM_007271	A_23_P390704	6.52361	6.70925	0.185641	0.000437767	0.0202476
A_33_P3375668	A_33_P3375668	A_33_P3375668	15.1337	15.316	0.182282	0.000115105	0.00918151
RPS7	NM_001011	A_32_P20367	13.2702	13.4509	0.180655	0.000485673	0.021551
RPL18	NM_000979	A_23_P142146	13.9797	14.1558	0.176147	9.61131e-05	0.00829892
RPL35	NM_007209	A_23_P112429	14.7221	14.8933	0.171155	0.000539543	0.0229388
PPPDE1	NM_016076	A_23_P201445	8.68787	8.85548	0.167617	0.00131588	0.0377115
LOC100133075	XR_039086	A_33_P3281728	5.79488	5.95955	0.164668	0.000647292	0.0254526
LOC100270680	AJ315134	A_33_P3631022	6.03788	6.19826	0.160383	0.000968008	0.0314246
FLOT2	NM_004475	A_24_P253818	6.09745	6.25133	0.153884	0.00107739	0.0334552
ZNF420	NM_144689	A_33_P3395389	6.79452	6.94735	0.15283	0.00137155	0.0388033
LYPD1	NM_144586	A_23_P419696	5.7973	5.93239	0.135084	0.0012566	0.0367405
NCAPG	NM_022346	A_33_P3230254	5.85928	5.96219	0.102906	0.000555493	0.0233796
OR2W1	NM_030903	A_23_P255389	5.95218	5.87335	-0.078824	0.00156438	0.0418075
ENST00000404616	ENST00000404616	A_33_P3366550	6.0602	5.97328	-0.0869181	0.00168866	0.043686
A_33_P3272513	A_33_P3272513	A_33_P3272513	6.02142	5.92745	-0.0939734	0.00175548	0.044724
LPAL2	NR_028093	A_24_P72178	6.00863	5.90668	-0.101947	0.00148506	0.0407473
AF289601	AF289601	A_33_P3333542	6.07616	5.97386	-0.102301	0.000966517	0.0314066
ENST00000399870	ENST00000399870	A_33_P3315154	5.93335	5.82895	-0.1044	0.00203942	0.0491192
KRTAP4-9	NM_001146041	A_24_P315975	6.01784	5.90994	-0.107903	0.00161664	0.0425595
ENST00000377879	ENST00000377879	A_33_P3349299	6.21678	6.10009	-0.116691	0.000944742	0.0310172
A_24_P917759	A_24_P917759	A_24_P917759	6.04664	5.92505	-0.121592	0.00201444	0.0486826
A_32_P120183	A_32_P120183	A_32_P120183	5.96251	5.83088	-0.131631	0.000662211	0.0257739
SSH1	NM_001161331	A_24_P332647	6.05839	5.92543	-0.132952	0.000805827	0.0284476
ENST00000399104	ENST00000399104	A_33_P3259712	6.07539	5.94193	-0.133464	0.000638545	0.0252568
ENST00000375713	ENST00000375713	A_33_P3213387	5.89621	5.75626	-0.139955	0.000331775	0.0175872
LOC100144595	AK090913	A_33_P3792641	6.10488	5.9641	-0.140783	0.0017164	0.0440298
C9orf128	NM_001012446	A_24_P751492	6.09132	5.94543	-0.145891	0.000135236	0.0101358
ADAM32	NM_145004	A_23_P44665	6.02651	5.88056	-0.14595	0.001135	0.0345002
A_33_P3270237	A_33_P3270237	A_33_P3270237	6.11911	5.97174	-0.147362	0.00116472	0.0349959
RBP2	NM_004164	A_23_P80491	6.00817	5.85771	-0.150457	0.0011501	0.0347435
POTED	NM_174981	A_23_P420348	6.03787	5.88376	-0.154107	0.000353839	0.0181813
XRCC6	NM_001469	A_23_P120942	13.6249	13.4707	-0.154193	0.00209632	0.0498573
KRTAP5-8	NM_021046	A_33_P3237542	6.35428	6.19867	-0.155607	0.000252112	0.0145125
ATP1B4	NM_012069	A_24_P91832	5.91695	5.75734	-0.159601	0.00168105	0.0436577
LOC645188	XR_040417	A_33_P3239644	5.99515	5.83227	-0.162888	0.00102879	0.0325771
LMLN	NM_033029	A_23_P170959	6.35772	6.19467	-0.163057	0.00147098	0.0405316
OR5H14	NM_001005514	A_33_P3362652	5.99993	5.83166	-0.168274	0.000597754	0.0245427
A_33_P3251871	A_33_P3251871	A_33_P3251871	6.69983	6.52989	-0.169941	0.00065706	0.0257159
ODF3L1	NM_175881	A_32_P468743	6.0088	5.83491	-0.17389	0.00138657	0.0390034
FLJ39095	AK096414	A_33_P3675395	6.63038	6.45465	-0.175734	0.000940841	0.0310172
TAC4	NM_170685	A_33_P3258046	6.37829	6.19765	-0.180636	0.000868225	0.0296506
TAF4B	NM_005640	A_33_P3336282	6.20885	6.02733	-0.181527	5.14796e-05	0.00590712
LOC100130587	AK127527	A_33_P3382914	6.53747	6.35531	-0.182157	0.000635807	0.0252379
LOC283177	AK095081	A_33_P3485976	6.51113	6.32767	-0.183463	0.000239581	0.0140709
ENST00000424278	ENST00000424278	A_33_P3344861	6.27061	6.08711	-0.183498	0.00140327	0.0394069
FREM3	XM_094074	A_24_P738168	6.08456	5.90054	-0.184014	0.000522898	0.0224591
OR7E5P	NR_027688	A_23_P408930	6.7303	6.54486	-0.18544	0.00191752	0.046994
GPSM1	NM_015597	A_33_P3293254	6.45929	6.27137	-0.187926	0.00171529	0.0440298
ENST00000409436	ENST00000409436	A_33_P3419910	6.64199	6.45202	-0.189973	0.00159422	0.0422878
AK123945	AK123945	A_33_P3246863	6.58183	6.38784	-0.193991	0.00164693	0.0430049
ENST00000382320	ENST00000382320	A_33_P3226575	6.04447	5.85029	-0.194182	0.0011545	0.0348136
ENST00000244070	ENST00000244070	A_33_P3280597	6.04896	5.85465	-0.194319	3.4459e-06	0.00115294
HIST1H2BE	NM_003523	A_33_P3302632	6.6467	6.44933	-0.197368	0.000972429	0.0314766
LOC645446	XM_001714416	A_33_P3271850	6.40283	6.20507	-0.197767	0.000995164	0.0319948
LOC100287704	NR_028348	A_33_P3545095	6.14188	5.94315	-0.198728	0.000526198	0.0225143
A_33_P3407863	A_33_P3407863	A_33_P3407863	6.9422	6.742	-0.200199	0.00109369	0.0336462
FCAR	NM_133271	A_24_P348265	6.20711	6.00641	-0.200694	4.44481e-05	0.00543467
PIAS2	NM_173206	A_33_P3349269	7.85927	7.65585	-0.203422	0.00209686	0.0498573
A_33_P3323054	A_33_P3323054	A_33_P3323054	6.39775	6.19295	-0.204798	0.00056279	0.0235455
SCFD1	NM_016106	A_33_P3311637	10.2449	10.0395	-0.20538	0.00179563	0.0451292
LOH12CR1	NM_058169	A_23_P257593	8.663	8.45757	-0.205433	0.00108655	0.03355
A_33_P3406702	A_33_P3406702	A_33_P3406702	12.5669	12.3606	-0.206261	0.000729276	0.0270828
DDX1	NM_004939	A_23_P108554	11.421	11.2147	-0.206272	0.000641184	0.0252657
C17orf86	NR_027058	A_32_P8529	7.5059	7.29928	-0.206626	0.00180598	0.045248
MRPL55	NM_181462	A_24_P160440	12.055	11.8477	-0.207368	0.00142794	0.0396777
HIST1H2AI	NM_003509	A_33_P3360216	6.10191	5.894	-0.207909	0.00140718	0.0394772
DLX3	NM_005220	A_24_P296587	6.28851	6.07987	-0.208643	0.000587432	0.0242965
C21orf33	NM_004649	A_23_P109333	11.8259	11.617	-0.208857	0.000929186	0.0307301
TNF	NM_000594	A_23_P376488	6.54756	6.33798	-0.209581	0.000341659	0.0177812
RRP7A	NM_015703	A_23_P29303	7.07062	6.86065	-0.209966	0.000188547	0.0122893
GEN1	NM_182625	A_24_P177585	6.44021	6.22961	-0.210605	0.00210017	0.0499006
TBCE	NM_001079515	A_23_P52147	10.1404	9.92879	-0.211562	0.00182711	0.0455506
EBNA1BP2	NM_006824	A_23_P103631	11.7589	11.5467	-0.212147	0.00130223	0.0375772
ENST00000370889	ENST00000370889	A_33_P3388806	6.41156	6.19666	-0.214901	0.00109241	0.0336379
KCNU1	NM_001031836	A_33_P3243008	6.04713	5.83119	-0.215941	0.00160763	0.0424832
C9orf30	NM_080655	A_32_P122754	8.46219	8.24416	-0.218026	0.00176131	0.0448045
DDX19A	NM_018332	A_33_P3242080	9.51013	9.29209	-0.218032	0.000397034	0.0193898
FXC1	NM_012192	A_33_P3243657	11.293	11.0738	-0.219178	0.000754171	0.0274932
SERPINB10	NM_005024	A_23_P313981	6.09478	5.87339	-0.221388	0.00134808	0.0384369
KRTAP5-4	NM_001012709	A_33_P3405369	6.92455	6.70239	-0.222165	0.000918767	0.0306719
RASSF5	NM_182664	A_24_P336584	6.37291	6.14744	-0.225466	0.000155812	0.0109895
C16orf7	NM_004913	A_23_P129476	9.61957	9.39394	-0.225631	0.00186938	0.0461857
BAT3	NM_004639	A_33_P3275668	13.275	13.0491	-0.22588	0.000685172	0.0263381
PPIH	NM_006347	A_33_P3298413	8.74231	8.51607	-0.226236	5.04474e-05	0.00586224
MICAL3	NM_001122731	A_33_P3267822	7.30018	7.07312	-0.227061	0.00106648	0.0332316
DDX26B	NM_182540	A_33_P3290800	7.24717	7.01828	-0.228885	0.000579788	0.0240304
TREM1	AK292162	A_33_P3319905	6.50758	6.27493	-0.232645	0.000483461	0.0215099
ALG1	NM_019109	A_24_P565556	6.49835	6.26514	-0.233205	0.00187417	0.0461939
ZFYVE20	NM_022340	A_24_P85181	9.80134	9.56661	-0.234726	0.0020748	0.0495975
WDR70	NM_018034	A_23_P30474	8.61897	8.38336	-0.235602	0.00113424	0.0345002
WDR5B	NM_019069	A_33_P3259542	6.32004	6.08405	-0.235993	0.00110623	0.0338532
FLVCR1	NM_014053	A_23_P12113	6.92593	6.68888	-0.237048	0.000835485	0.0290658
TARS2	NM_025150	A_23_P553	9.15018	8.91256	-0.237619	0.00102625	0.0325273
AMIGO3	NM_198722	A_23_P306655	7.33459	7.09566	-0.238928	0.00178462	0.0450519
ZNF174	NM_001032292	A_33_P3233774	7.03965	6.80035	-0.239295	0.00142093	0.039676
ENST00000395807	ENST00000395807	A_33_P3230528	6.55948	6.31893	-0.240549	0.00129197	0.0374138
C1orf107	NM_014388	A_23_P34946	6.90942	6.66873	-0.240685	0.00161844	0.0425595
PA2G4	NM_006191	A_33_P3227209	12.3558	12.1149	-0.2409	0.000406516	0.0195536
ENST00000398278	ENST00000398278	A_33_P3422951	6.09734	5.85544	-0.241904	0.00169652	0.0438219
SEC23IP	NM_007190	A_23_P202602	8.84912	8.60683	-0.242297	0.00173596	0.0444294
ENST00000380308	ENST00000380308	A_33_P3417620	6.49358	6.25005	-0.243531	0.000314355	0.0169045
TIMM8A	NM_004085	A_23_P217637	8.19878	7.95475	-0.24403	0.000144545	0.0105041
LOC100129986	XM_001718307	A_33_P3412418	6.6839	6.43987	-0.244031	0.000549676	0.0231663
C10orf68	NM_024688	A_32_P114028	6.4467	6.2017	-0.244994	4.00912e-05	0.00520595
C1QBP	NM_001212	A_23_P370434	12.3227	12.077	-0.245734	0.000142276	0.01043
CEACAM6	NM_002483	A_23_P218442	6.54159	6.29417	-0.247422	0.000217755	0.0133857
MRPS22	NM_020191	A_23_P72138	10.3003	10.0524	-0.247867	0.00178049	0.0450289
SNRPD1	NM_006938	A_23_P107644	11.1474	10.8981	-0.249251	0.000761488	0.0275586
UBA3	NM_003968	A_23_P211840	8.35693	8.1074	-0.249533	0.0015011	0.0409526
VAMP1	NM_016830	A_23_P105545	6.75028	6.49979	-0.250484	0.000956074	0.0312187
PARL	NM_018622	A_33_P3335451	11.1749	10.9243	-0.250531	0.00114103	0.034563
C6orf103	NM_024694	A_23_P70643	6.06783	5.81716	-0.250671	0.000368314	0.0184996
C7orf20	NM_015949	A_24_P400355	11.122	10.871	-0.251006	0.00182211	0.0454876
LOC145837	NR_026979	A_32_P46594	7.15437	6.90311	-0.251258	0.000562467	0.0235455
ATIC	NM_004044	A_23_P68087	9.49789	9.24498	-0.252909	0.00170241	0.043857
XPA	NM_000380	A_23_P60283	9.51089	9.25662	-0.25427	0.000320519	0.0170716
FAM125B	NM_001011703	A_24_P941557	6.45579	6.20008	-0.255706	0.000100309	0.00848628
LOC728196	XR_040780	A_33_P3357738	6.11394	5.85707	-0.25687	4.7148e-06	0.00136168
DUT	NM_001025248	A_23_P88484	12.7493	12.4855	-0.263828	1.88218e-05	0.00335409
ENST00000392558	ENST00000392558	A_33_P3393734	6.84676	6.58286	-0.263896	2.66952e-05	0.00414047
LOC441666	NR_024380	A_33_P3245517	6.27008	6.00585	-0.26423	0.000849715	0.0292872
EIF3C	NM_001037808	A_23_P77568	13.8254	13.5608	-0.264616	0.00146686	0.04048
LRRC70	NM_181506	A_23_P41664	6.74862	6.48336	-0.265263	0.00106583	0.0332316
PABPN1	NM_004643	A_23_P128828	11.7172	11.4508	-0.266358	0.000114583	0.00916169
TTC19	NM_017775	A_23_P50008	9.76775	9.5011	-0.266645	0.000172973	0.0115899
CDC40	NM_015891	A_24_P414786	9.16879	8.90142	-0.26737	0.000588682	0.0243181
LOC100130413	XM_001725589	A_33_P3349496	6.67434	6.40675	-0.267584	0.000160718	0.0111018
LOC100130401	BC069659	A_33_P3347035	6.70689	6.43877	-0.268119	0.000102902	0.0086276
C9orf82	NM_001167575	A_33_P3220242	7.4013	7.13101	-0.270298	7.08324e-05	0.00712159
LOC100129322	AK127678	A_33_P3385121	6.04629	5.77529	-0.271	0.000731528	0.0271088
HIST2H2BF	NM_001024599	A_33_P3229239	6.67734	6.40536	-0.271986	0.00114692	0.0346787
TRMT6	NM_015939	A_23_P210747	8.07378	7.80104	-0.272742	0.000950961	0.0311124
BZW2	NM_014038	A_23_P157215	9.35581	9.08263	-0.273179	0.000706017	0.0266244
EDC4	NM_014329	A_33_P3294392	11.2485	10.974	-0.274451	0.00196132	0.0477183
A_33_P3256660	A_33_P3256660	A_33_P3256660	8.54791	8.27181	-0.276099	0.0011369	0.0345002
RTN4IP1	NM_032730	A_23_P122775	8.43262	8.15643	-0.276198	0.000338275	0.0177291
ERLEC1	NM_015701	A_33_P3325018	11.1212	10.8447	-0.276463	0.000265728	0.0151145
SLC23A1	NM_152685	A_23_P21990	6.16047	5.88394	-0.27653	0.000685535	0.0263381
ENST00000405331	ENST00000405331	A_33_P3325978	8.04186	7.76412	-0.277742	0.00182872	0.0455506
GOT2	NM_002080	A_33_P3414482	13.0214	12.7426	-0.278849	0.00010913	0.00884007
LOC151162	NR_024275	A_33_P3255209	12.3376	12.0576	-0.280004	0.00188687	0.0463786
CCDC39	NM_181426	A_32_P404549	6.30197	6.02155	-0.280422	0.000621469	0.0249646
SARDH	NM_001134707	A_33_P3257861	7.88194	7.60061	-0.281325	0.00155081	0.0416461
C17orf102	NM_207454	A_33_P3334005	6.54168	6.26011	-0.281569	0.000633138	0.0252216
ARFGAP1	NM_175609	A_23_P210379	10.5714	10.2888	-0.282541	0.00200343	0.0484964
ANKHD1	NM_024668	A_23_P92642	8.21513	7.93154	-0.283589	0.000763438	0.0275711
KIAA1598	CR749417	A_33_P3419134	6.50558	6.22133	-0.28425	0.000639438	0.0252623
PRR13	NM_001005354	A_23_P139575	13.4012	13.1166	-0.284564	0.000170723	0.0115082
NDUFV1	NM_007103	A_33_P3317406	12.8443	12.5594	-0.284841	0.000158643	0.0110651
SPATA6	NM_019073	A_23_P327483	7.79642	7.5112	-0.285227	0.00103923	0.0327424
POLR2A	NM_000937	A_33_P3218138	11.6556	11.3686	-0.286941	0.00125918	0.0367787
NSUN6	NM_182543	A_23_P61580	8.16586	7.8787	-0.28716	0.000707883	0.0266428
PLDN	NM_012388	A_33_P3374833	10.7148	10.4274	-0.287477	0.0004952	0.0216865
SYNCRIP	NM_006372	A_23_P214798	9.82166	9.53394	-0.287714	0.000788821	0.028084
IFT172	NM_015662	A_23_P406135	11.2465	10.9587	-0.287842	0.00160171	0.0424529
OVCA2	NM_080822	A_23_P118462	11.333	11.0449	-0.288135	0.000116706	0.00926821
MCCC2	NM_022132	A_23_P18887	7.35739	7.06836	-0.289035	0.00010547	0.00875379
DNAJC27	NM_016544	A_23_P17275	8.24969	7.95835	-0.291337	0.00178707	0.0450519
LOC100128675	NR_024561	A_33_P3244568	7.2711	6.97966	-0.29144	0.000963435	0.0313966
THBS3	NM_007112	A_23_P201047	7.73164	7.43859	-0.293052	0.00199128	0.0482371
TUSC2	NM_007275	A_23_P251562	11.5886	11.2954	-0.293172	0.00110182	0.0337762
THRAP3	NM_005119	A_24_P926367	11.6777	11.3841	-0.29363	6.2101e-06	0.00157657
CS	NM_004077	A_33_P3215078	12.3257	12.0317	-0.293924	0.000105252	0.00875379
CYB5RL	BC071735	A_33_P3353263	6.32876	6.03334	-0.295415	0.000318596	0.0170233
RBKS	NM_022128	A_23_P9523	8.58562	8.28893	-0.296686	0.00183273	0.0455979
LOC100272228	NR_027456	A_33_P3290368	8.18858	7.89158	-0.297006	0.000487677	0.0215828
C9orf96	NM_153710	A_33_P3632866	7.51361	7.21526	-0.298349	0.00180016	0.0452092
RABL2A	NM_013412	A_24_P250650	11.3956	11.0969	-0.298711	0.00153346	0.0413676
ARFGAP2	NM_032389	A_33_P3272483	11.8408	11.5419	-0.298949	0.000688285	0.0263386
COMMD4	NM_017828	A_24_P331904	11.8203	11.521	-0.299276	0.00068504	0.0263381
KIF11	NM_004523	A_24_P227091	7.01329	6.71396	-0.299325	4.57896e-05	0.00546192
LOC286367	NR_024011	A_33_P3216898	7.18098	6.88114	-0.299839	0.00129742	0.0374771
ENST00000437568	ENST00000437568	A_23_P59630	9.23163	8.93165	-0.299982	0.00208545	0.0497626
ATL1	NM_181598	A_23_P88351	10.8166	10.5164	-0.300198	0.00158219	0.0420614
PNKP	NM_007254	A_33_P3402918	8.72196	8.42126	-0.300703	0.00108845	0.0335776
C9orf11	NM_020641	A_24_P100650	6.68212	6.3812	-0.300919	0.000185353	0.0121521
A_33_P3248035	A_33_P3248035	A_33_P3248035	6.83197	6.53078	-0.301183	0.00021576	0.0133857
MRPL21	NM_181515	A_23_P115955	11.0033	10.7011	-0.302207	0.00119403	0.035463
C20orf85	NM_178456	A_23_P314835	6.83908	6.53601	-0.303061	0.00083404	0.0290648
ENST00000311122	ENST00000311122	A_24_P152404	7.33352	7.02806	-0.305461	0.000227033	0.0137425
NPEPL1	NM_024663	A_24_P45005	10.7677	10.462	-0.305711	0.00120022	0.0355839
IGFL2	NM_001002915	A_23_P153571	6.51085	6.2041	-0.306745	0.000630425	0.0252216
PTMA	NM_001099285	A_33_P3219803	16.691	16.3833	-0.307676	0.000873795	0.0297499
LOC93622	NR_015433	A_23_P428992	10.1929	9.88463	-0.308221	1.65045e-05	0.00300508
ARHGEF18	NM_015318	A_23_P50357	11.4978	11.1865	-0.311277	4.15611e-05	0.00531443
NCOR2	NM_006312	A_23_P203891	13.2816	12.9693	-0.312276	0.000919909	0.0306719
SRP72	NM_006947	A_23_P337201	11.6311	11.3178	-0.313342	4.5325e-05	0.00546192
CCDC108	NM_152389	A_33_P3309734	6.4706	6.15722	-0.31338	0.00142351	0.039676
LENG9	NM_198988	A_33_P3338724	8.44655	8.13217	-0.314378	0.00119652	0.0355056
FHIT	NM_002012	A_33_P3216601	7.53928	7.2245	-0.314778	0.000305374	0.0165813
VWA5B1	NM_001039500	A_33_P3381608	6.14857	5.83377	-0.314803	7.9245e-06	0.00176992
SLC13A4	NM_012450	A_23_P19778	6.79094	6.47605	-0.314893	0.000129881	0.00993437
PTMA	NM_002823	A_24_P264207	16.3225	16.0074	-0.315098	0.00072998	0.0270828
PWP1	NM_007062	A_23_P395524	10.5136	10.1981	-0.315526	0.00024615	0.0142673
POLR2E	NM_002695	A_33_P3299834	7.0654	6.74846	-0.316944	0.000684138	0.0263381
SLC12A9	NM_020246	A_33_P3229181	11.5006	11.1835	-0.317091	0.00177204	0.0449994
CCDC33	NM_182791	A_33_P3328726	7.39886	7.08117	-0.317686	0.00161336	0.0425263
HDAC5	NM_001015053	A_24_P125283	12.1905	11.8722	-0.31833	0.000816358	0.0286084
TRAPPC9	NM_031466	A_23_P73420	9.51628	9.19743	-0.318854	0.00174823	0.0446072
EWSR1	NM_013986	A_33_P3339536	11.0193	10.7004	-0.318862	9.78174e-05	0.00835989
CALM2	NM_001743	A_23_P326170	15.1745	14.8533	-0.32116	0.000845486	0.0292618
ENST00000369494	ENST00000369494	A_33_P3384272	6.49856	6.17548	-0.32308	7.798e-06	0.0017648
ZNF33B	NM_006955	A_33_P3296871	9.22076	8.89697	-0.323788	0.000338018	0.0177291
RTN4	NM_020532	A_33_P3233550	15.8046	15.4806	-0.323982	0.000910036	0.0305186
SNX29	NM_001080530	A_23_P367816	9.88978	9.56578	-0.323992	0.00117962	0.0351911
SVOPL	NM_174959	A_23_P307860	6.6927	6.36829	-0.324406	0.000761725	0.0275586
DTD1	NM_080820	A_23_P17512	10.7241	10.3989	-0.325263	0.00196114	0.0477183
APOOL	NM_198450	A_23_P136986	8.29635	7.97016	-0.326185	8.9312e-05	0.00793668
ZNF462	NM_021224	A_23_P60499	11.3594	11.0327	-0.326656	0.00096527	0.0313966
DSCAML1	NM_020693	A_23_P47340	10.0894	9.7623	-0.327114	0.000389902	0.0192095
PTMA	NM_001099285	A_33_P3346403	15.9768	15.6491	-0.327665	0.000796436	0.0282579
ATP6V0C	NM_001694	A_23_P54816	15.4389	15.1098	-0.329057	0.00160488	0.0424832
ENST00000389825	ENST00000389825	A_33_P3379406	6.60707	6.27745	-0.329621	4.24593e-05	0.00536782
LOC222070	AK056566	A_33_P3637909	10.757	10.4264	-0.330543	0.00152524	0.0412084
CCRK	NM_001039803	A_23_P20752	8.97918	8.64831	-0.330878	0.00027676	0.0154791
A_33_P3405904	A_33_P3405904	A_33_P3405904	7.11243	6.78139	-0.331036	0.00035959	0.0183032
SFRS3	NM_003017	A_23_P413761	11.8416	11.5089	-0.332652	0.000796554	0.0282579
FOXRED2	NM_024955	A_24_P147765	8.98868	8.65584	-0.33284	0.000339439	0.0177408
DKFZp686K1684	BX648962	A_33_P3852239	6.31404	5.97999	-0.334048	0.00208145	0.0497026
ZNF789	NM_001013258	A_33_P3311775	8.29475	7.96061	-0.334141	7.39106e-05	0.00725638
C15orf51	NR_003260	A_24_P110141	6.85901	6.52486	-0.334151	0.00150817	0.0409745
BBS5	NM_152384	A_23_P5785	7.12325	6.789	-0.334253	0.000798541	0.0282798
NHLRC3	NM_001012754	A_32_P129950	8.8055	8.47101	-0.334492	0.00174656	0.0445986
PTPRS	NM_002850	A_33_P3309468	13.5377	13.2011	-0.336602	9.13414e-05	0.0080742
PPRC1	NM_015062	A_23_P127079	9.8182	9.48158	-0.33662	0.000167185	0.0113382
TPM3	NM_152263	A_33_P3223990	7.41424	7.07759	-0.336644	0.00133297	0.0381359
GATAD2B	NM_020699	A_33_P3323822	9.23338	8.8961	-0.337279	0.000694848	0.0263902
LDLRAD2	NM_001013693	A_33_P3260125	6.14994	5.81247	-0.337469	0.00178223	0.0450289
PPL	NM_002705	A_23_P106906	7.16921	6.83116	-0.338046	0.00039992	0.0194782
ZMYM5	NM_001039650	A_23_P65208	6.94126	6.6031	-0.338164	0.000270332	0.0152213
CTSF	NM_003793	A_23_P24433	13.5488	13.2107	-0.338186	8.3617e-06	0.00182495
REPS1	NM_031922	A_23_P70748	10.3109	9.97185	-0.339091	0.00102263	0.0324791
SNX26	NM_052948	A_23_P404730	8.19334	7.85392	-0.339416	0.00209515	0.0498573
KBTBD11	NM_014867	A_23_P94319	13.4376	13.0976	-0.340006	0.000442822	0.0203583
EIF4E	NM_001130679	A_32_P203300	9.72496	9.38405	-0.340913	0.00134608	0.038418
PEX1	NM_000466	A_23_P20045	8.52182	8.18009	-0.341733	0.00183734	0.0455979
A_33_P3397298	A_33_P3397298	A_33_P3397298	7.83404	7.49213	-0.341908	0.00116831	0.0350506
C19orf6	NM_001033026	A_23_P90369	12.0375	11.6956	-0.341956	0.000181205	0.0119502
ATPIF1	NM_178191	A_23_P126716	13.4346	13.0924	-0.342279	0.000175443	0.0116969
GHRL	NM_016362	A_23_P40956	7.05201	6.70955	-0.342459	0.00020589	0.0129413
TCF25	NM_014972	A_24_P306561	12.3739	12.0307	-0.343254	0.000271785	0.0152723
D2HGDH	NM_152783	A_23_P376627	10.5962	10.2528	-0.343409	0.00100748	0.0322375
MESDC1	NM_022566	A_23_P99891	9.96605	9.62219	-0.343865	5.95205e-05	0.0063103
MRPS25	NM_022497	A_33_P3266444	8.54705	8.20246	-0.344593	0.000549591	0.0231663
TMEM209	NM_032842	A_33_P3283136	9.28331	8.93827	-0.345044	0.000673382	0.0261107
RASGRF1	NM_002891	A_23_P3371	7.52307	7.17797	-0.3451	0.00078115	0.0278999
TELO2	NM_016111	A_33_P3287770	11.3215	10.9761	-0.34541	0.00116863	0.0350506
C1QTNF8	NM_207419	A_33_P3291034	6.37208	6.02555	-0.346534	0.00161263	0.0425263
UBE2CBP	NM_198920	A_24_P626931	7.39368	7.04562	-0.348064	0.00015965	0.0110967
COG1	NM_018714	A_33_P3372580	10.4486	10.1002	-0.348398	7.67503e-05	0.00737522
40973	NM_017824	A_24_P64393	6.91736	6.56779	-0.349573	0.0010758	0.0334552
PCM1	NM_006197	A_24_P555510	9.76991	9.42004	-0.349863	0.000822034	0.0287472
PPP1R12B	NM_032105	A_23_P201790	12.2278	11.8776	-0.350215	3.34426e-05	0.0047338
C8orf82	NM_001001795	A_33_P3387050	11.6163	11.2656	-0.350648	0.0019785	0.0479968
RPL23AP53	NR_003572	A_33_P3354021	9.86367	9.51259	-0.351084	1.461e-06	0.000753028
AKIRIN1	NM_024595	A_33_P3294404	9.37623	9.02484	-0.351392	0.0016705	0.0434728
NCRNA00181	NR_015380	A_24_P721699	7.36275	7.01129	-0.351459	0.000883963	0.0299439
FBXO3	NM_033406	A_23_P363826	7.33125	6.97702	-0.354237	2.01116e-05	0.00343764
C19orf36	NM_001031735	A_23_P50674	7.84776	7.49352	-0.354237	0.000602675	0.0246454
CEP110	NM_007018	A_24_P109554	7.61657	7.26213	-0.354438	4.58122e-05	0.00546192
U2AF1	NM_001025204	A_23_P6303	13.3371	12.9824	-0.354646	2.259e-07	0.000216199
ANKS3	NM_133450	A_33_P3211153	11.2469	10.8912	-0.355687	0.000524681	0.0224781
KIAA1704	ENST00000361121	A_24_P219053	8.00985	7.65306	-0.356789	0.000171171	0.0115152
KNDC1	NM_152643	A_24_P32574	6.66488	6.30786	-0.357026	0.0012921	0.0374138
LRRC49	NM_017691	A_23_P129174	9.02879	8.67145	-0.357341	0.000312456	0.0168728
ABHD14A	NM_015407	A_33_P3283713	11.5711	11.2133	-0.357789	0.000775439	0.0277254
OCIAD1	NM_001079839	A_23_P213093	11.5154	11.1569	-0.358537	0.000229493	0.0137786
NDUFA10	NM_004544	A_33_P3351914	12.2346	11.8752	-0.359357	0.000221082	0.0134912
SMARCA4	NM_003072	A_23_P39034	11.912	11.5525	-0.359429	1.99183e-05	0.00342207
TRUB2	NM_015679	A_23_P169428	9.87926	9.51744	-0.361826	0.00017065	0.0115082
ALKBH2	NM_001001655	A_32_P28939	10.3967	10.0341	-0.362631	4.5857e-06	0.00135957
ARMCX4	NR_028407	A_33_P3211864	7.79384	7.43114	-0.362702	0.000758034	0.0275441
ITGAX	AK309642	A_33_P3213169	6.45994	6.09524	-0.364706	0.00168409	0.043669
hCG_1820661	NR_024270	A_33_P3239317	8.98211	8.61671	-0.365405	0.00125678	0.0367405
DAK	NM_015533	A_33_P3245011	10.7924	10.4268	-0.365644	0.000406806	0.0195536
HNRNPK	NM_002140	A_24_P380919	11.7111	11.3448	-0.366268	0.000156234	0.0109961
TRIM66	NM_014818	A_32_P396186	6.89214	6.52543	-0.366706	0.00208714	0.0497675
ENST00000372567	ENST00000372567	A_33_P3248405	6.37608	6.00928	-0.366801	0.00204254	0.0491281
ANKRD16	NM_001009941	A_33_P3267502	8.45715	8.09032	-0.366827	0.000162778	0.0111294
NAPG	NM_003826	A_23_P141770	12.0027	11.6358	-0.366863	7.56763e-05	0.00730636
GLI4	NM_138465	A_33_P3252794	9.59777	9.2307	-0.367066	0.00154281	0.0415158
MAN2A2	NM_006122	A_23_P37569	10.6485	10.2814	-0.367069	0.00149945	0.040941
C13orf30	NM_182508	A_32_P332551	6.23235	5.86307	-0.369274	0.00072572	0.0270661
AIG1	NM_016108	A_23_P93431	11.1774	10.8066	-0.370787	2.82685e-05	0.00426599
ENST00000400702	ENST00000400702	A_33_P3354589	6.55475	6.18344	-0.371307	0.000295681	0.0162659
STX18	NM_016930	A_23_P135616	9.42977	9.05782	-0.371954	0.00156925	0.0418575
C9orf75	NM_173691	A_33_P3297923	14.4115	14.0389	-0.372569	0.000827086	0.0288937
RTF1	NM_015138	A_24_P390403	8.50556	8.13225	-0.373316	0.00117426	0.0351017
DACT3	NM_145056	A_23_P360964	12.8378	12.4644	-0.373326	0.000442994	0.0203583
NALCN	NM_052867	A_33_P3230166	10.7411	10.3657	-0.375419	0.00197763	0.0479968
THSD1	NM_018676	A_23_P14184	10.6208	10.2452	-0.375581	0.000632791	0.0252216
ARL8A	NM_138795	A_23_P138271	13.4591	13.083	-0.376066	1.94792e-05	0.00341672
ALG1	NM_019109	A_32_P169131	8.89242	8.51601	-0.376418	5.1042e-06	0.00140498
SLC35E3	NM_018656	A_23_P147729	9.2744	8.89764	-0.376759	0.000279312	0.0155699
EPM2A	NM_001018041	A_24_P239419	7.08116	6.70287	-0.378294	0.001305	0.0375925
SLC20A1	NM_005415	A_23_P165657	11.2234	10.845	-0.378343	0.000160333	0.0110981
LDOC1	NM_012317	A_33_P3215113	12.5738	12.1953	-0.378488	0.000411411	0.0195782
FBXL17	NM_001163315	A_33_P3314436	7.94331	7.56439	-0.378915	0.000714135	0.0268038
TMEM201	NM_001010866	A_33_P3292525	10.7086	10.3289	-0.379695	0.000513219	0.0221856
ATE1	NM_001001976	A_23_P138574	8.08664	7.70657	-0.380069	0.00204273	0.0491281
PPP1R12C	NM_017607	A_33_P3521643	12.4591	12.079	-0.380085	0.000126421	0.00977434
CCNB3	NM_033031	A_23_P171107	7.67159	7.29061	-0.380983	0.00165261	0.0431198
MAGI1	NM_004742	A_33_P3369535	9.19845	8.81578	-0.382673	0.000945275	0.0310172
ABCE1	NM_002940	A_23_P41380	9.52817	9.14363	-0.384535	2.24723e-05	0.00363984
C1orf175	NM_001039464	A_23_P160226	8.70777	8.32297	-0.384804	0.000632739	0.0252216
PLCD4	NM_032726	A_23_P385105	7.16192	6.77673	-0.385185	0.00102376	0.0324791
DPF3	AK024141	A_33_P3423185	8.37088	7.98543	-0.385454	0.000927717	0.0307301
SF1	NM_004630	A_24_P266728	11.8177	11.432	-0.385648	2.1439e-06	0.000855046
GREB1L	NM_001142966	A_33_P3271470	7.18576	6.79752	-0.388236	0.000292473	0.0161424
SLC25A44	NM_014655	A_24_P400473	10.1779	9.78922	-0.388672	1.373e-07	0.000153278
ANKRD36B	NM_025190	A_33_P3261648	9.79833	9.40945	-0.388876	0.00167987	0.0436577
ANKS6	NM_173551	A_23_P362183	11.2077	10.8178	-0.389892	0.000534259	0.022743
CPEB1	NM_030594	A_33_P3268838	11.4218	11.0309	-0.390879	3.34994e-05	0.0047338
C21orf2	NM_004928	A_33_P3240647	9.72827	9.33552	-0.392748	2.03653e-05	0.00346335
LOC728052	XM_001717850	A_33_P3399480	7.30111	6.90723	-0.393882	0.00103041	0.0325975
DYNC1H1	NM_001376	A_23_P128706	13.4762	13.0816	-0.394615	1.6142e-06	0.000781811
C22orf27	NR_026920	A_32_P122793	7.59601	7.19808	-0.39793	0.000736959	0.0271314
RPAIN	NM_001160266	A_24_P36097	8.79977	8.40126	-0.398512	0.00158317	0.0420614
BCLAF1	NM_014739	A_23_P111343	11.3251	10.925	-0.400035	0.000690162	0.0263386
A_33_P3232273	A_33_P3232273	A_33_P3232273	6.89424	6.4941	-0.400139	1.05111e-05	0.00217372
SLC48A1	NM_017842	A_33_P3353552	13.0142	12.6127	-0.40152	0.000507972	0.0219872
STMN1	NM_203401	A_33_P3317523	14.8257	14.4235	-0.402153	0.000658002	0.0257227
LOC389033	NR_026740	A_33_P3283601	11.3934	10.9906	-0.402784	0.0018448	0.0457471
TOLLIP	NM_019009	A_33_P3385101	11.3554	10.952	-0.403421	0.000417318	0.0197583
SFRS2	NM_003016	A_23_P77776	11.806	11.4025	-0.403472	0.000217474	0.0133857
YWHAZ	NM_145690	A_32_P198923	11.1822	10.7781	-0.404045	0.000676185	0.0261603
MPP2	NM_005374	A_33_P3360611	10.2805	9.87536	-0.405168	0.000360033	0.0183032
PFDN6	NM_014260	A_23_P122563	9.98296	9.57643	-0.406526	0.00117558	0.0351017
NDUFS1	NM_005006	A_23_P131365	12.4645	12.058	-0.406588	1.264e-07	0.000151176
EXOSC9	NM_005033	A_23_P81121	9.98635	9.5794	-0.406955	3.46638e-05	0.00481285
ENST00000415250	ENST00000415250	A_33_P3389599	6.96254	6.55475	-0.407793	3.7853e-06	0.00120768
FOSB	NM_006732	A_23_P429998	6.65928	6.25133	-0.407941	0.000408346	0.019561
NTM	NM_001144058	A_33_P3296333	10.0823	9.6742	-0.408125	4.43083e-05	0.00543467
ANKRD39	NM_016466	A_33_P3294053	10.1623	9.75264	-0.409642	1.9648e-06	0.000835914
TAF15	NM_139215	A_23_P159305	11.5606	11.1499	-0.410638	6.418e-07	0.000457454
ENST00000440451	ENST00000440451	A_33_P3333232	6.75068	6.3395	-0.411174	9.8363e-06	0.00207256
BPI	NM_001725	A_23_P131785	6.33687	5.92519	-0.411678	0.000864509	0.0295618
MAPK8IP3	NM_015133	A_33_P3279841	14.0626	13.6505	-0.412051	0.000227587	0.0137425
CLDN3	NM_001306	A_33_P3285565	6.93235	6.52001	-0.412338	0.000492921	0.0216688
FLJ39051	AK096370	A_33_P3708658	6.44639	6.03333	-0.413061	0.00104806	0.0329691
TMEM175	NM_032326	A_33_P3293266	11.1835	10.7701	-0.413347	5.52892e-05	0.00601396
ATG2A	NM_015104	A_33_P3257312	10.9925	10.5785	-0.413994	1.9666e-06	0.000835914
PTDSS2	NM_030783	A_32_P353798	12.4637	12.0493	-0.414445	0.00197762	0.0479968
APBB3	NM_006051	A_23_P110445	9.94629	9.53149	-0.414806	0.00155635	0.0416461
TAF9	NM_001015892	A_32_P90210	9.83892	9.42304	-0.415883	8.23141e-05	0.00761792
AZI1	NM_014984	A_23_P319270	10.355	9.93879	-0.416181	4.74886e-05	0.00558232
TTYH1	NM_020659	A_23_P50815	15.2303	14.8141	-0.4162	0.000418035	0.0197583
RNPC3	NM_017619	A_33_P3339066	11.7983	11.3819	-0.416421	0.00128241	0.0372621
CCL3L3	NM_001001437	A_33_P3296181	7.37964	6.96249	-0.417151	0.000198008	0.0127425
LOC729887	XR_040889	A_32_P101699	8.728	8.31038	-0.417622	0.000257866	0.0147928
GIPC1	NM_005716	A_33_P3390102	13.0399	12.622	-0.417888	5.23541e-05	0.0059573
FLJ37543	NM_173667	A_23_P312383	6.74479	6.32531	-0.419482	0.000445608	0.0204267
NSUN2	NM_017755	A_23_P7423	10.1471	9.7259	-0.421147	0.000714458	0.0268038
VAPB	NM_004738	A_33_P3365586	10.2409	9.8191	-0.421794	0.0013684	0.0387526
PLEKHG3	NM_015549	A_33_P3304212	13.4077	12.9858	-0.421869	0.00175765	0.0447454
MAT2A	NM_005911	A_23_P401568	11.8878	11.4656	-0.42215	0.000654115	0.0256855
TMEM121	NM_025268	A_33_P3411632	10.3657	9.94265	-0.423073	9.37325e-05	0.00819072
ENST00000203616	ENST00000203616	A_33_P3330473	7.73507	7.31007	-0.424993	0.00145027	0.0401691
LOC284900	NR_026963	A_33_P3362148	8.69289	8.2678	-0.425087	8.06584e-05	0.0075481
SIK3	NM_025164	A_24_P329924	10.9362	10.5104	-0.425764	0.000814026	0.0286084
SNX1	NM_003099	A_33_P3268716	11.3213	10.8949	-0.426331	0.000424773	0.0199811
NLK	NM_016231	A_33_P3327108	11.2667	10.8394	-0.427267	6.31281e-05	0.00653505
TRIM46	NM_025058	A_33_P3390778	8.37343	7.94554	-0.427895	0.00046258	0.0209141
ACAP3	NM_030649	A_33_P3398564	11.9081	11.4795	-0.428643	0.000408714	0.019561
FSCN1	NM_003088	A_33_P3411075	13.5279	13.0992	-0.428749	0.000838642	0.0291145
APP	NM_000484	A_33_P3508822	14.3696	13.9394	-0.430197	0.000107072	0.00875379
TCEAL7	NM_152278	A_24_P49106	10.0188	9.58863	-0.430203	0.00130905	0.0376121
CCDC42B	NM_001144872	A_33_P3359027	6.65858	6.22763	-0.430946	0.00185134	0.0458755
ENST00000400842	ENST00000400842	A_24_P187056	6.54691	6.11591	-0.430993	0.000196558	0.012688
ENST00000374747	ENST00000374747	A_24_P136551	8.02505	7.59358	-0.431473	0.000997032	0.0319948
HBS1L	NM_006620	A_33_P3289192	11.8707	11.438	-0.432745	9.00348e-05	0.00797975
GATS	NR_028038	A_33_P3419691	13.3315	12.8978	-0.433714	0.00180711	0.045248
SRRM2	NM_016333	A_23_P323166	13.2306	12.7965	-0.43417	4.17201e-05	0.00531448
SLC25A32	NM_030780	A_24_P69439	9.42666	8.99226	-0.434406	0.00022923	0.0137786
LOC728769	XR_078316	A_33_P3781394	9.51421	9.07929	-0.434923	0.000726298	0.0270661
GPSM1	NM_001145638	A_32_P215938	12.0625	11.6273	-0.43516	3.04544e-05	0.00447493
ENST00000377296	ENST00000377296	A_33_P3282688	7.644	7.20779	-0.436211	0.000846924	0.0292631
ANKMY1	NM_016552	A_33_P3315554	8.80909	8.37261	-0.436485	0.000249818	0.0144052
FAIM2	NM_012306	A_33_P3248982	13.9188	13.4817	-0.437079	0.00116294	0.0349914
LOC644961	BX648289	A_33_P3570223	14.9869	14.5494	-0.437527	0.000240537	0.0140786
C17orf28	NM_030630	A_33_P3274935	11.2803	10.8403	-0.439949	0.00155144	0.0416461
CORO7	NM_024535	A_33_P3343295	11.108	10.6676	-0.440414	7.76569e-05	0.00740992
GON4L	NM_001037533	A_23_P97250	10.5014	10.0602	-0.441146	4.08e-07	0.000303749
PMF1	NM_007221	A_23_P635	9.46173	9.02004	-0.441687	0.000851686	0.0293249
SNAPC4	NM_003086	A_23_P20722	10.8897	10.4477	-0.442008	1.32892e-05	0.00252962
TOM1L2	NM_001082968	A_23_P141180	12.9938	12.5516	-0.442218	0.000216619	0.0133857
LOC728537	XR_041702	A_24_P456723	9.18191	8.73877	-0.443146	0.00110648	0.0338532
FAM22A	NM_001099338	A_32_P799227	7.14456	6.70116	-0.443404	4.27159e-05	0.00537995
ZNF789	NM_213603	A_33_P3311770	8.0367	7.59303	-0.443664	0.00142292	0.039676
C1orf59	NM_144584	A_23_P309361	9.6957	9.24965	-0.446042	9.70882e-05	0.00832169
GREB1L	NM_001142966	A_23_P119040	7.08604	6.63999	-0.446057	0.0014272	0.0396777
PCYOX1L	NM_024028	A_23_P30275	8.9432	8.49713	-0.446073	6.75498e-05	0.00687858
CECR6	NM_031890	A_23_P259344	8.03934	7.59325	-0.446093	0.00183725	0.0455979
PRMT7	NM_019023	A_23_P77430	11.1191	10.6701	-0.448968	0.000149856	0.0107046
A_33_P3332999	A_33_P3332999	A_33_P3332999	7.01981	6.57047	-0.449337	1.19718e-05	0.00238737
MFSD6	NM_017694	A_33_P3272209	11.4824	11.0318	-0.450554	0.000791766	0.0281589
CCNH	NM_001239	A_23_P30338	9.79526	9.34272	-0.45254	0.000354398	0.0181813
HTRA1	NM_002775	A_23_P97990	15.5428	15.0899	-0.452916	0.00042584	0.0199811
AGAP3	NM_001042535	A_33_P3240543	13.8185	13.3651	-0.453312	0.00162538	0.0426418
ARHGEF4	NM_032995	A_23_P253221	12.1629	11.709	-0.453894	8.49377e-05	0.00763966
A_33_P3416787	A_33_P3416787	A_33_P3416787	7.15942	6.70396	-0.455457	0.00152379	0.0412027
ARHGEF9	NM_015185	A_24_P254551	8.97794	8.52042	-0.457522	0.00143128	0.0397273
PPARGC1A	NM_013261	A_23_P18447	7.50085	7.04323	-0.457629	0.00174124	0.0445306
FAM74A3	NR_026801	A_33_P3234678	6.38418	5.92606	-0.458116	0.00127944	0.0372405
SH3TC1	NM_018986	A_23_P41390	7.65154	7.19328	-0.458258	0.00163882	0.0428937
CLIC6	NM_053277	A_23_P385067	6.41075	5.94993	-0.460823	0.000606167	0.0246454
ALS2CR8	NM_024744	A_33_P3323218	8.08619	7.62526	-0.460925	0.000842349	0.0291834
COX11	NM_004375	A_23_P152666	10.9911	10.5296	-0.461466	0.000101143	0.00853522
PPIF	NM_005729	A_23_P202104	11.815	11.3529	-0.462119	9.5604e-05	0.00827629
PSMG1	NM_003720	A_23_P68717	9.83305	9.36978	-0.46327	0.000145443	0.0105041
TTC29	NM_031956	A_23_P92517	6.61985	6.15658	-0.463271	0.00162687	0.0426475
FBRSL1	NM_001142641	A_23_P368934	10.4627	9.99656	-0.466114	3.19515e-05	0.00461397
hCG_1990547	NR_024361	A_33_P3421200	8.09695	7.6284	-0.468552	0.000516887	0.0222788
LOC147670	AK095199	A_33_P3221034	8.39444	7.92549	-0.468947	0.00187368	0.0461939
ACCN2	NM_020039	A_23_P204751	9.94953	9.47937	-0.470163	0.000772456	0.0276741
NUP98	NM_005387	A_23_P308032	8.85996	8.38956	-0.470396	0.000282323	0.0156596
C9orf140	NM_178448	A_24_P100517	8.55293	8.08182	-0.471116	4.63066e-05	0.00548185
SORCS2	NM_020777	A_23_P121665	9.12296	8.65093	-0.472028	0.000403238	0.0194939
PTPRV	NR_002930	A_33_P3309481	7.79665	7.32458	-0.472077	0.00040853	0.019561
GPI	NM_000175	A_24_P108451	12.2047	11.7324	-0.472282	4.4656e-06	0.00133578
LOC100130373	AK090920	A_33_P3343962	7.33343	6.85881	-0.474626	9.402e-07	0.000605739
TPPP	NM_007030	A_33_P3371999	14.8765	14.4017	-0.474828	0.00144849	0.0401691
PPP1R16B	NM_015568	A_23_P352535	12.0713	11.5944	-0.476877	0.000482957	0.0215099
DNAI1	NM_012144	A_33_P3304242	6.96516	6.48668	-0.478482	0.00122577	0.0360378
MNT	NM_020310	A_23_P341443	11.4435	10.965	-0.478508	8.34779e-05	0.00762037
MYO5A	NM_000259	A_24_P255218	10.4988	10.0191	-0.479656	0.00147132	0.0405316
PPP1R2	NM_006241	A_24_P174367	8.88939	8.40966	-0.479727	0.000759162	0.0275552
SFRS16	NM_007056	A_33_P3236403	12.371	11.8904	-0.48055	6.91628e-05	0.00700028
DNM1L	NM_012062	A_24_P743907	9.61427	9.13006	-0.484203	1.727e-07	0.00017537
EFS	NM_005864	A_23_P48561	12.7318	12.2475	-0.484304	0.00129764	0.0374771
SF1	NM_201997	A_24_P235783	9.93626	9.45151	-0.484751	0.000162167	0.0111294
LOC643037	XM_926406	A_32_P60635	7.45004	6.96499	-0.48505	0.00168674	0.0436762
SIN3B	NM_015260	A_33_P3225230	12.0474	11.5615	-0.485895	3.94951e-05	0.00518888
DOPEY1	NM_015018	A_33_P3300757	8.61273	8.12578	-0.486947	3.6552e-06	0.0011889
TARBP1	NM_005646	A_23_P52058	8.55271	8.0655	-0.487212	4.3056e-05	0.00538518
MYLK3	NM_182493	A_33_P3300217	6.61678	6.12897	-0.487804	0.00106713	0.0332316
AHI1	NM_017651	A_24_P38143	8.89131	8.40153	-0.489779	8.47055e-05	0.00763966
HNRPDL	NM_031372	A_23_P213153	10.9547	10.4638	-0.490873	1.54061e-05	0.00286742
STOML3	NM_145286	A_23_P357983	6.39545	5.90367	-0.491785	0.000228061	0.0137425
POTEE	NM_001083538	A_24_P825874	6.54346	6.05131	-0.492152	5.5968e-06	0.00151214
ACACB	NM_001093	A_33_P3334220	10.2886	9.79625	-0.492328	0.000619072	0.0249498
LOC100130547	AK128153	A_33_P3259938	7.75545	7.26194	-0.49351	0.000743281	0.0272743
PIK3C2B	NM_002646	A_23_P200710	12.0867	11.5925	-0.494239	0.000723613	0.0270262
EPB41L1	NM_012156	A_23_P154806	12.0648	11.5691	-0.495769	1.07507e-05	0.00220964
FAM166B	NM_001099951	A_23_P20578	6.73442	6.23856	-0.495865	0.000198163	0.0127425
EPB41L1	NM_012156	A_24_P185709	9.44686	8.95066	-0.4962	3.5169e-06	0.00115514
HNRNPD	NM_031370	A_23_P58353	12.0131	11.5149	-0.498177	4.07e-08	8.36624e-05
TREX1	NM_016381	A_33_P3383866	9.7446	9.24311	-0.501489	8.0831e-06	0.00179339
BEX2	NM_032621	A_33_P3245178	12.6046	12.1025	-0.502118	7.43204e-05	0.00725913
KLHDC4	NM_017566	A_33_P3375476	11.1923	10.69	-0.502262	0.00014813	0.0106306
RORC	NM_005060	A_33_P3386671	7.07446	6.5718	-0.502657	0.000940595	0.0310172
NOXA1	NM_006647	A_23_P254353	8.88755	8.38466	-0.502896	0.000162604	0.0111294
RPS6KB2	NM_003952	A_33_P3230488	11.4832	10.9799	-0.503283	7.8027e-06	0.0017648
MSTO1	NM_018116	A_33_P3333527	10.1353	9.62824	-0.507065	1.09742e-05	0.00224182
GOLGA8A	NM_181077	A_23_P37623	8.3943	7.88505	-0.509257	0.000350851	0.0180834
RNF126	NM_194460	A_23_P314086	11.3386	10.8293	-0.509334	2.835e-06	0.00106718
PRR7	NM_030567	A_23_P30464	10.678	10.1664	-0.511668	5.2073e-05	0.00595409
KHSRP	NM_003685	A_23_P16157	12.9301	12.4165	-0.513627	1.2603e-06	0.000692163
LLGL2	NM_001031803	A_33_P3372074	10.6807	10.166	-0.514684	9.29116e-05	0.00817866
CCDC84	NM_198489	A_24_P636332	11.0157	10.5006	-0.515122	0.000199773	0.0127725
ATP6V1G2	NM_130463	A_23_P500410	11.5959	11.0796	-0.516289	0.000337322	0.0177291
SHFM1	NM_006304	A_23_P42664	12.5827	12.0662	-0.516467	2.567e-07	0.000232413
RGS11	NM_003834	A_23_P118122	11.683	11.1659	-0.517127	0.000363846	0.0184343
ENST00000274513	ENST00000274513	A_33_P3357853	7.07465	6.55617	-0.518479	0.000213179	0.0133494
CCL4L1	AY766452	A_33_P3354604	7.21063	6.68448	-0.526147	2.6939e-06	0.00103738
ENST00000319040	ENST00000319040	A_33_P3291349	9.27627	8.74919	-0.527076	0.000205021	0.0129169
PLXNB3	NM_001163257	A_33_P3413038	10.8769	10.3493	-0.52763	0.00010301	0.0086276
SEZ6L2	NM_201575	A_23_P10194	11.3575	10.8246	-0.532978	0.000359697	0.0183032
PACS2	NM_001100913	A_24_P393372	12.5772	12.042	-0.535238	0.000409989	0.0195662
SLC4A8	NM_001039960	A_33_P3419998	8.41636	7.87896	-0.537396	3.78119e-05	0.00504691
ENST00000375322	ENST00000375322	A_33_P3246505	7.07423	6.53682	-0.537414	0.000171563	0.0115185
CTNNBIP1	NM_020248	A_23_P23584	11.2148	10.6764	-0.538405	1.98539e-05	0.00342207
DNAJB13	NM_153614	A_33_P3369854	7.40951	6.8703	-0.539209	0.000131594	0.00999696
ENST00000397554	ENST00000397554	A_33_P3309054	9.01142	8.47176	-0.539656	3.0952e-06	0.0010757
LOC100288578	XR_078216	A_23_P301925	16.1319	15.5917	-0.540208	0.000697377	0.0264227
LRRC49	NM_017691	A_33_P3344399	8.53697	7.99657	-0.540403	2.909e-07	0.000249904
ITIH4	NM_002218	A_23_P109881	10.0383	9.49404	-0.544242	1.96762e-05	0.00342207
RCAN2	NM_005822	A_32_P156851	12.1712	11.6203	-0.550911	0.000179382	0.0118534
LIPE	NM_005357	A_33_P3294986	14.1993	13.6479	-0.551373	0.000718202	0.0269141
MYBPHL	NM_001010985	A_33_P3358750	8.45539	7.90375	-0.551644	0.000318097	0.0170233
CTTN	NM_005231	A_33_P3310780	12.2069	11.6535	-0.55341	3.1145e-06	0.0010757
ENST00000293201	ENST00000293201	A_24_P369898	9.28697	8.7333	-0.553665	0.000430494	0.0200869
TIMM13	NM_012458	A_33_P3413845	7.54753	6.99198	-0.555548	1.5579e-06	0.000781811
CDS1	NM_001263	A_23_P7250	6.93204	6.3754	-0.556645	0.000765494	0.0276038
DBNL	AB209486	A_33_P3211260	8.8978	8.33611	-0.561687	3.61381e-05	0.00492154
CHADL	NM_138481	A_33_P3339531	14.0346	13.4714	-0.56321	0.000863314	0.0295618
SFRS6	NM_006275	A_33_P3220530	11.8421	11.2786	-0.563497	4.3096e-06	0.00130072
ENST00000331733	ENST00000331733	A_23_P26928	6.80609	6.23933	-0.566756	0.000467931	0.0210707
ARHGEF7	NM_145735	A_23_P417891	10.1229	9.55373	-0.56914	0.000854013	0.0293749
LOC150568	NR_015399	A_24_P709476	9.00565	8.43412	-0.571531	0.000179	0.0118515
LOC100132733	XM_001715342	A_32_P109604	7.37658	6.8049	-0.571674	0.001773	0.0449994
PCBP4	NM_033010	A_23_P166807	13.855	13.2829	-0.572076	7.8489e-06	0.0017648
NEDD9	NM_182966	A_33_P3368358	6.72408	6.14947	-0.574611	1.24346e-05	0.002422
EGR3	NM_004430	A_23_P216225	6.72245	6.14761	-0.574842	0.000230514	0.0137851
SEMA3B	NM_004636	A_23_P132718	14.6588	14.0831	-0.575712	6.37797e-05	0.0065746
SLC48A1	NM_017842	A_24_P309594	13.09	12.513	-0.576928	0.00100737	0.0322375
IVD	NM_001159508	A_33_P3269718	10.577	9.99838	-0.578571	1.535e-07	0.000160696
LOC283788	NR_027436	A_32_P80089	11.636	11.0545	-0.581544	0.0014618	0.0403737
SH2D6	NM_198482	A_33_P3357199	8.44714	7.86425	-0.58289	0.000282971	0.0156696
AMY1C	NM_001008219	A_23_P23611	10.3909	9.80648	-0.584433	0.00136587	0.0387518
TAC3	NM_013251	A_23_P2283	7.53354	6.94751	-0.586027	0.000708577	0.0266428
TBC1D13	NM_018201	A_23_P94660	12.5385	11.9524	-0.586146	2.9152e-06	0.00106924
NTNG2	NM_032536	A_23_P423331	10.6981	10.11	-0.588118	4.6911e-06	0.00136168
RCOR2	NM_173587	A_33_P3211929	9.25436	8.66576	-0.588599	8.30185e-05	0.00762037
PNPLA7	NM_001098537	A_33_P3666884	11.516	10.9206	-0.595355	3.25072e-05	0.00465409
DCAF16	NM_017741	A_33_P3296308	11.3686	10.7699	-0.598693	1.04201e-05	0.00216828
HIP1R	NM_003959	A_23_P398294	13.9763	13.3765	-0.599716	6.9137e-05	0.00700028
SLC7A14	NM_020949	A_32_P88262	8.3855	7.78506	-0.600446	0.000125764	0.00977434
DEFA4	NM_001925	A_23_P326080	6.77447	6.17309	-0.601386	0.00136607	0.0387518
CLEC9A	NM_207345	A_33_P3319022	7.04295	6.44018	-0.602775	0.00105262	0.0330505
COL9A3	NM_001853	A_23_P40108	13.3096	12.7061	-0.603508	0.000155067	0.0109657
PTGDS	NM_000954	A_33_P3298159	17.3367	16.733	-0.603785	1.2039e-06	0.000683246
LOC650392	BC036550	A_33_P3883985	13.7108	13.1038	-0.60695	0.000161721	0.0111294
BDH1	NM_203314	A_33_P3252359	9.07786	8.46542	-0.612442	0.000461102	0.0208755
CITED4	NM_133467	A_32_P209230	11.217	10.6001	-0.616848	0.00012489	0.00977434
GNAO1	NM_020988	A_33_P3404814	11.3763	10.7566	-0.619714	0.000132964	0.0100554
DNAI2	NM_023036	A_33_P3285629	7.59699	6.97414	-0.622849	0.00169395	0.043789
LOC729983	XM_001718065	A_32_P152696	9.53108	8.90784	-0.623235	2.9362e-06	0.00106924
DHCR7	NM_001360	A_23_P24444	12.2307	11.602	-0.628692	0.000813921	0.0286084
RUFY2	NM_001042417	A_24_P941708	11.3556	10.7265	-0.629078	9.67385e-05	0.00832169
C17orf108	NM_001076680	A_23_P392126	10.9568	10.3265	-0.630318	0.000147205	0.0106057
NDST1	NM_001543	A_33_P3300092	12.7099	12.0761	-0.633815	5.9882e-06	0.00156732
CKB	NM_001823	A_23_P25674	12.7901	12.1553	-0.634875	1.309e-07	0.000151176
SLC7A14	NM_020949	A_33_P3288624	7.66252	7.02642	-0.636102	0.000134948	0.0101358
ENOSF1	NM_017512	A_33_P3261902	10.494	9.85754	-0.636493	0.000579685	0.0240304
MYH7B	NM_020884	A_33_P3407469	11.0511	10.4102	-0.640885	2.22037e-05	0.00363984
LDB3	NM_007078	A_32_P98227	10.4148	9.77186	-0.642976	0.000110379	0.00886792
OPLAH	NM_017570	A_23_P170186	9.93041	9.28508	-0.645333	1.26499e-05	0.00244969
PRODH	NM_016335	A_33_P3338341	10.6398	9.9871	-0.652691	0.000479424	0.0214155
HHATL	NM_020707	A_23_P255298	11.2798	10.6226	-0.65718	0.000175967	0.0116969
A_33_P3290949	A_33_P3290949	A_33_P3290949	7.92944	7.26668	-0.662758	3.44e-08	8.36624e-05
DUSP26	NM_024025	A_23_P146134	12.8392	12.1738	-0.665409	2.1254e-06	0.000855046
LOC284232	NR_027995	A_32_P13151	7.31281	6.64415	-0.668662	7.18315e-05	0.00718282
AATK	NM_001080395	A_23_P10559	13.8795	13.2105	-0.668943	2.35427e-05	0.00377382
C4orf22	NM_152770	A_23_P312999	6.81946	6.148	-0.671459	0.000307376	0.016663
ENST00000409415	ENST00000409415	A_33_P3339376	8.30511	7.63252	-0.672591	2.24386e-05	0.00363984
ADSSL1	NM_199165	A_23_P76823	9.79378	9.11141	-0.682378	1.9304e-05	0.0034038
LARP6	NM_197958	A_33_P3237977	10.8114	10.1068	-0.704617	0.000829488	0.0289474
COL16A1	NM_001856	A_23_P160318	12.8952	12.1768	-0.718443	5.44948e-05	0.00596629
DPP6	NM_001039350	A_23_P170888	10.8228	10.1026	-0.720177	1.22339e-05	0.00241094
CAMK2N1	NM_018584	A_23_P11800	13.8962	13.1753	-0.720847	3.789e-07	0.000288512
OSGEP	NM_017807	A_23_P54079	9.63193	8.90961	-0.72232	1.2e-09	2.52151e-05
EGR2	NM_000399	A_23_P46936	7.5002	6.77747	-0.722735	0.000122567	0.00961649
CCDC153	NM_001145018	A_24_P450285	7.63623	6.90749	-0.728737	0.000616475	0.0249133
SNIP	NM_025248	A_32_P201530	11.2118	10.48	-0.731734	2.92541e-05	0.00437532
EIF4E1B	NM_001099408	A_33_P3375516	6.86719	6.12914	-0.738049	0.00107949	0.0334552
AGPAT4	NM_020133	A_32_P141768	12.4863	11.7322	-0.754122	3.63089e-05	0.00492478
SFRS5	NM_001039465	A_23_P377819	13.0245	12.2695	-0.75494	6.51e-08	0.000103847
FAM22F	NM_017561	A_33_P3212754	8.6588	7.90058	-0.758213	5.09e-08	8.98367e-05
XM_001716578	XM_001716578	A_33_P3278684	9.82221	9.06011	-0.762101	0.000592502	0.0244281
SFRS5	NM_001039465	A_33_P3366146	13.3349	12.5727	-0.762265	3.68e-08	8.36624e-05
C17orf72	NM_001164257	A_33_P3315243	7.28781	6.52158	-0.766226	0.000767093	0.0276038
VSTM2B	NM_001146339	A_33_P3218316	10.0709	9.28662	-0.784321	4.2526e-06	0.00130072
SPEF1	NM_015417	A_33_P3314643	9.58145	8.7886	-0.79285	0.00150693	0.0409745
CERCAM	NM_016174	A_33_P3260575	15.1066	14.3115	-0.795174	5.34331e-05	0.00596629
A_33_P3253832	A_33_P3253832	A_33_P3253832	14.7798	13.9846	-0.795205	4.22758e-05	0.00536486
C11orf88	NM_207430	A_32_P225345	6.8801	6.06802	-0.812075	0.000119067	0.00940798
ATPGD1	NM_001166222	A_23_P344884	12.6049	11.7917	-0.813196	0.000505312	0.0219287
GLDN	NM_181789	A_24_P49199	11.5143	10.6869	-0.827476	0.00107922	0.0334552
CA14	NM_012113	A_23_P63379	12.4295	11.599	-0.830489	0.000307906	0.0166647
OGDHL	NM_018245	A_23_P161297	8.93676	8.05092	-0.885844	0.000126103	0.00977434
CCL4	NM_002984	A_33_P3354607	7.95969	7.0322	-0.927495	0.000203552	0.0129169
SREBF1	NM_001005291	A_23_P129786	13.3158	12.3558	-0.960043	1.14759e-05	0.0023301
CCDC114	NM_144577	A_33_P3261054	7.98015	6.94866	-1.03149	2.46024e-05	0.00386963
C9orf117	NM_001012502	A_24_P229638	7.19771	6.16556	-1.03215	3.29457e-05	0.00469679
DNAH2	NM_020877	A_32_P206899	8.03779	6.95032	-1.08747	1.7083e-06	0.000806098
CCL4	NM_002984	A_23_P207564	8.91723	7.78108	-1.13615	2.81381e-05	0.00426553
EGR1	NM_001964	A_23_P214080	10.0118	8.84341	-1.16844	0.00056026	0.0235211
TTR	NM_000371	A_23_P130333	11.1189	9.12301	-1.99587	7.56e-08	0.000110143

## Sheet: High vs Low Cortisol
Gene	Systematic name	Probe	Average LOW	Average HIGH	logFC	p value	p value (adjusted)
NPTX2	NM_002523	A_23_P82651	8.19446	10.7153	2.52083	3.503e-07	0.00060326
S100A8	NM_002964	A_23_P434809	8.88226	11.2091	2.32681	4.2449e-05	0.00803271
CD163	NM_004244	A_23_P33723	8.503	10.5969	2.09394	3.42767e-05	0.00687628
HSPA1A	NM_005345	A_23_P111132	13.2958	15.0512	1.75544	5.3785e-05	0.00938493
SLCO4A1	NM_016354	A_23_P5903	7.86217	9.61229	1.75012	1.15225e-05	0.00396203
VSIG4	NM_007268	A_23_P217269	10.001	11.7259	1.72485	2.49407e-05	0.00596832
ABCA6	NM_080284	A_23_P500400	9.09555	10.8127	1.71711	5.2379e-05	0.00928467
SERPINA3	NM_001085	A_33_P3399788	12.101	13.7783	1.67731	0.000120696	0.0138478
HSPA1B	NM_005346	A_33_P3415430	12.5942	14.2335	1.63932	0.000344917	0.025066
C10orf10	NM_007021	A_24_P329795	8.41792	10.0508	1.63285	3.6859e-06	0.00212904
LILRB3	NM_006864	A_32_P70158	8.01665	9.56417	1.54752	1.12209e-05	0.00394704
SLC14A1	NM_001146037	A_23_P55616	10.1337	11.6789	1.54516	2.53147e-05	0.00601484
JAK3	NM_000215	A_24_P59667	8.10296	9.61846	1.51551	6.34e-08	0.000284114
S100A9	NM_002965	A_23_P23048	7.41593	8.98601	1.57009	2.86004e-05	0.00646716
SLAMF8	NM_020125	A_23_P200138	7.39227	8.83297	1.4407	9.6452e-06	0.00365543
SERPINA3	NM_001085	A_23_P162918	9.58237	11.0094	1.427	0.000124212	0.0141542
SERPINH1	NM_001235	A_33_P3269203	9.51858	10.9352	1.41663	0.000109645	0.013166
HSPH1	NM_006644	A_33_P3348752	9.78422	11.1771	1.39286	2.65836e-05	0.00622801
SOCS3	NM_003955	A_23_P207058	7.73366	9.12641	1.39275	0.000696746	0.0370092
S100A12	NM_005621	A_33_P3385785	6.81623	8.20195	1.38573	0.000438005	0.0283283
MKNK2	NM_017572	A_23_P142310	11.2714	12.6566	1.38516	6.851e-07	0.00070633
FCGBP	NM_003890	A_23_P21495	8.74968	10.1345	1.38483	0.000212739	0.0188052
S100A12	NM_005621	A_23_P74001	7.48787	8.85461	1.36674	0.00104184	0.0464763
DNAJB1	NM_006145	A_23_P90062	10.265	11.6187	1.35377	0.000246429	0.0207289
KCNK12	NM_022055	A_33_P3256510	10.6483	11.6157	0.967412	0.000834605	0.0411261
FPR1	NM_002029	A_23_P38795	8.98396	10.268	1.28403	0.000493539	0.0303386
HSPH1	NM_006644	A_23_P88119	11.8514	13.1271	1.27567	0.000133459	0.0144751
SLC14A1	NM_001146037	A_33_P3210399	8.99344	10.2529	1.25941	5.32107e-05	0.00933332
CSDA	NM_003651	A_23_P25224	9.38547	10.6305	1.24507	1.74297e-05	0.00474738
FKBP5	NM_004117	A_24_P38081	7.17484	8.4174	1.24256	7.865e-07	0.000731968
IL1RL1	NM_016232	A_23_P51126	6.41432	7.85919	1.44487	3.0208e-05	0.00661457
BATF	NM_006399	A_23_P128974	7.25726	8.43864	1.18138	2.2007e-06	0.00153597
DDIT4	NM_019058	A_23_P104318	10.5161	11.6849	1.16884	4.65872e-05	0.00852876
LPL	NM_000237	A_23_P146233	8.38969	9.5451	1.15541	0.000405183	0.0272579
SRGN	NM_002727	A_23_P86653	9.4361	10.5875	1.15143	0.000352698	0.0254109
COL4A2	NM_001846	A_23_P205031	9.4624	10.61	1.14759	1.6076e-06	0.00122404
BIRC3	NM_001165	A_23_P98350	7.91801	9.06417	1.14616	4.426e-07	0.000617902
RASD1	NM_016084	A_23_P118392	11.1153	12.2361	1.12084	0.000143899	0.0151126
ZBTB16	NM_006006	A_23_P104804	10.1841	11.3024	1.11825	1.6551e-06	0.00123218
C1QB	NM_000491	A_23_P137366	11.7491	12.8519	1.10285	0.00087726	0.0423486
GPR4	NM_005282	A_23_P357284	7.20967	8.14627	0.936598	0.000926098	0.0436373
OR7A5	NM_017506	A_23_P16630	7.03816	8.12484	1.08667	0.000699071	0.0370092
TUBA1C	NM_032704	A_24_P188071	9.8148	10.8983	1.08349	1.56879e-05	0.00445404
HILS1	NR_024193	A_24_P144784	8.0354	9.11155	1.07614	9.19682e-05	0.0122842
BCL3	NM_005178	A_23_P4662	8.68538	9.74303	1.05765	0.000186593	0.0177089
CHORDC1	NM_012124	A_23_P138805	9.55256	10.6175	1.06496	8.67675e-05	0.0121627
SLA	NM_001045556	A_23_P216340	9.24959	10.3136	1.064	0.000128626	0.0143641
TNFRSF6B	NM_032945	A_23_P218646	7.27045	8.47724	1.20679	4.4574e-06	0.00224054
ANGPT2	NM_001147	A_23_P60079	8.17175	9.20516	1.03342	0.000912937	0.0432606
KLF9	NM_001206	A_23_P415401	10.6251	11.6572	1.03211	0.000172223	0.0165799
BAG3	NM_004281	A_23_P47077	8.37625	9.38646	1.01021	0.000102185	0.0128699
HEJ1	AF395440	A_33_P3807268	9.56343	10.5716	1.00814	0.000101847	0.0128699
DNAJA1	NM_001539	A_24_P9671	10.8896	11.891	1.00135	0.000100329	0.0128291
HSPB1	NM_001540	A_33_P3287646	13.1458	14.1469	1.00112	8.81717e-05	0.0122015
LOC100132857	XR_037044	A_33_P3280355	11.776	12.7572	0.981208	8.582e-07	0.000756631
RFTN1	NM_015150	A_23_P315571	8.60957	9.58829	0.978716	0.000810009	0.0403223
CP	NM_000096	A_33_P3296587	8.11068	9.08344	0.972756	9.73679e-05	0.0126593
MIA	NM_006533	A_23_P4714	7.04784	8.0574	1.00956	0.000138154	0.0146934
TCAP	NM_003673	A_23_P107051	9.095	10.0536	0.958599	1.2777e-05	0.00403935
CASP4	NM_033306	A_23_P35912	8.7507	9.69764	0.946941	1.5991e-06	0.00122404
TIMP1	NM_003254	A_23_P62115	8.60948	9.55066	0.941188	8.76526e-05	0.0122015
SPR	NM_003124	A_23_P68211	8.4897	9.43077	0.941065	3.22024e-05	0.00678482
PIM1	NM_002648	A_23_P345118	8.00112	8.9363	0.935174	0.000154752	0.0154019
HSP90AB5P	AY956766	A_33_P3882659	10.4834	11.4114	0.928032	4.064e-06	0.00224054
TLR2	NM_003264	A_23_P92499	7.76693	8.68857	0.92164	0.000764212	0.0388507
TUBB6	NM_032525	A_23_P254271	9.57889	10.4967	0.917845	0.000693238	0.0370092
HSP90AA1	NM_005348	A_23_P162874	14.9873	15.896	0.908676	0.000334933	0.024677
SLC39A14	NM_015359	A_23_P59950	9.10702	10.0115	0.904484	1.65636e-05	0.00454847
RNU105A	NR_004404	A_33_P3254695	8.72026	9.6011	0.880841	6.87321e-05	0.0107151
COL4A1	NM_001845	A_23_P65240	7.5757	8.45376	0.878062	0.000265405	0.0216554
SNORA73A	NR_002907	A_33_P3316505	7.96722	8.84465	0.877428	4.31207e-05	0.00807055
FCGR2A	NM_021642	A_23_P85716	8.25463	9.12283	0.868193	0.000366866	0.0258209
NP	NM_000270	A_23_P140256	9.74747	10.6078	0.860349	2.77811e-05	0.0063748
PDK4	NM_002612	A_24_P243749	11.0745	11.9329	0.858366	0.000160888	0.0157604
HSP90AB1	NM_007355	A_23_P145089	11.3482	12.1998	0.851595	7.9724e-06	0.0032514
CEBPB	NM_005194	A_23_P411296	9.53488	10.3725	0.837569	0.000212598	0.0188052
PNMT	NM_002686	A_23_P100642	7.59516	8.42829	0.833128	0.000685169	0.0368125
BCL6	NM_001130845	A_23_P57856	10.8148	11.644	0.829213	0.000427517	0.0280288
CACYBP	NM_014412	A_32_P114574	10.2136	11.0396	0.826006	9.59592e-05	0.0126072
CP	NM_000096	A_33_P3343196	7.73244	8.55045	0.818001	0.000467957	0.0295275
OR7A5	NM_017506	A_33_P3330418	6.27875	7.09143	0.812681	0.000385828	0.0265967
FAM107A	NM_007177	A_23_P84860	14.7926	15.5921	0.799515	0.000153102	0.0153339
HSP90AA1	NM_001017963	A_32_P199252	12.3835	13.176	0.792486	0.000529	0.031591
AHSA1	NM_012111	A_23_P117599	10.1667	10.9503	0.783668	5.02385e-05	0.00900049
MANF	NM_006010	A_23_P132793	11.3637	12.1385	0.774799	1.27805e-05	0.00403935
HSP90AB2P	NR_003132	A_33_P3408054	12.5584	13.3317	0.773265	0.000105882	0.0130846
P4HA2	NM_004199	A_23_P30363	8.44314	9.21554	0.772397	0.00028001	0.0224961
DNAJA4	NM_018602	A_23_P206140	11.523	12.2915	0.768531	5.70334e-05	0.00955366
SOD2	NM_001024465	A_23_P134176	10.2471	11.0142	0.767109	0.00113662	0.0488818
JMJD6	NM_015167	A_23_P311616	7.4515	8.2162	0.764701	0.000371035	0.0259954
RUNX1	NM_001001890	A_33_P3211804	7.2595	8.01854	0.759036	0.000337344	0.024689
LPIN3	NM_022896	A_33_P3393341	8.78138	9.53691	0.755527	0.00102289	0.0461467
HSP90B3P	NR_003130	A_33_P3401252	10.5641	11.3168	0.752784	1.113e-07	0.000314833
CRELD1	NM_015513	A_23_P155376	10.0868	10.8378	0.75106	1.33635e-05	0.0040888
FAM58A	NM_152274	A_23_P404005	10.771	11.5216	0.75061	0.000335882	0.024677
SLC11A1	NM_000578	A_33_P3702055	8.26936	9.01241	0.743051	5.62258e-05	0.00951353
SCARA3	NM_182826	A_33_P3352019	8.70347	9.43926	0.735784	0.000335497	0.024677
GABRE	NM_004961	A_23_P159775	7.67711	8.41196	0.734853	0.00035857	0.0256322
HSP90AB1	NM_007355	A_24_P823684	10.8818	11.6165	0.734645	0.000306196	0.0238562
THAP3	NM_138350	A_33_P3271387	8.62252	9.35598	0.733453	0.000614091	0.0345189
HSP90AA2	M30627	A_33_P3849600	13.7983	14.53	0.731679	0.00105116	0.0466703
CACYBP	NM_014412	A_24_P84428	9.92824	10.6593	0.731055	0.000374001	0.0259954
PRKY	NR_028062	A_23_P137248	7.43855	8.16375	0.725197	5.753e-07	0.000669414
STIP1	NM_006819	A_32_P92783	8.15941	8.88067	0.721253	2.76866e-05	0.0063748
NFKBIA	NM_020529	A_23_P106002	11.8495	12.5616	0.712063	0.00115885	0.0492314
EFCAB3	NM_001144933	A_33_P3264042	7.05615	8.12424	1.06809	2.805e-06	0.00174024
RNU105A	NR_004404	A_33_P3355407	8.27476	8.98009	0.705328	0.000246875	0.0207289
PVRL2	NM_001042724	A_23_P208293	8.7231	9.42394	0.700841	0.000132203	0.0144751
A_32_P514599	A_32_P514599	A_32_P514599	9.57409	10.2745	0.700451	2.24546e-05	0.00557632
IER5	NM_016545	A_23_P86330	10.0496	10.7492	0.699619	0.00105455	0.0466703
CSDA	NM_003651	A_24_P625382	8.07234	9.16635	1.09401	5.11525e-05	0.00911549
CASP5	NM_004347	A_23_P47304	7.35568	8.04957	0.693888	3.41556e-05	0.00687628
ENST00000457596	ENST00000457596	A_23_P147805	7.91492	8.6088	0.693876	1.32963e-05	0.0040888
C5orf62	NM_032947	A_23_P414273	8.42015	9.11292	0.692773	0.000316899	0.0240743
PEX6	NM_000287	A_23_P42144	9.06329	9.75599	0.692702	0.000324045	0.0243411
C11orf75	NM_020179	A_23_P75430	8.82034	9.51039	0.690051	4.4808e-06	0.00224054
FFAR3	NM_005304	A_33_P3298810	6.58198	7.26502	0.683043	4.4119e-06	0.00224054
IFITM2	NM_006435	A_24_P287043	12.4963	13.1762	0.679884	0.000479349	0.0298744
HSP90B1	NM_003299	A_33_P3408212	9.18163	9.85342	0.671796	7.63e-08	0.000284114
HSP90B1	NM_003299	A_23_P2601	13.3149	13.9833	0.668439	1.811e-07	0.000404462
LOC100287820	XM_002343256	A_33_P3308132	9.67499	10.3362	0.661248	0.000339393	0.0247303
MC1R	NM_002386	A_33_P3352767	8.38778	9.04869	0.660906	0.000423258	0.0279155
TEKT4	NM_144705	A_32_P231179	7.35031	8.00973	0.65942	0.000533738	0.0316573
HSP90AB2P	NR_003132	A_33_P3324890	9.11821	9.77657	0.658356	0.00115136	0.0491376
PYGL	NM_002863	A_23_P48676	7.90878	8.56607	0.657293	0.000962271	0.0442764
FAM58B	NM_001105517	A_33_P3335606	8.49597	9.14466	0.648694	0.000364133	0.0257911
XBP1	NM_005080	A_23_P120845	10.2838	10.932	0.648181	0.00105254	0.0466703
UNC13D	NM_199242	A_24_P53215	7.22079	7.86238	0.641586	5.484e-07	0.000669414
LOC100132288	NM_001033515	A_24_P306443	7.34308	7.98385	0.640771	9.14258e-05	0.0122842
IL4R	NM_000418	A_23_P129556	9.9122	11.1194	1.20716	5.527e-07	0.000669414
BCO2	NM_031938	A_33_P3888485	8.34673	8.98373	0.636992	0.000148791	0.0152491
KIAA1949	NM_133471	A_23_P331479	8.90473	9.5412	0.636471	0.000943009	0.0440009
FKBP4	NM_002014	A_23_P128372	10.0103	10.645	0.634658	0.000964771	0.0442764
PDIA4	NM_004911	A_23_P42802	8.90904	9.53904	0.629995	9.8037e-06	0.00365543
LOC387647	NR_003930	A_33_P3257503	8.38405	9.00413	0.62008	2.35015e-05	0.00570542
PRKX	NM_005044	A_23_P217339	8.33322	9.68873	1.35551	7.3e-09	0.000169986
IL3RA	NM_002183	A_32_P217750	7.648	8.25836	0.610361	0.000372756	0.0259954
CYHR1	BC004544	A_23_P318604	8.70227	9.30813	0.605862	6.20177e-05	0.0100458
PPM1K	NM_152542	A_24_P214598	10.5711	11.1713	0.600134	0.000134163	0.0144991
DNAJB6	NM_058246	A_23_P385063	8.00406	8.60231	0.598246	0.000469192	0.0295275
ENST00000399573	ENST00000399573	A_24_P15502	11.7023	12.2938	0.591536	0.000944633	0.0440154
IFITM4P	NR_001590	A_24_P16124	11.3636	11.9524	0.588796	0.000954663	0.0441756
RXRA	NM_002957	A_23_P423197	10.7004	11.2784	0.578001	0.000104343	0.0130437
CDK2AP2	NM_005851	A_33_P3329839	12.276	12.8534	0.577355	2.91251e-05	0.006505
HSPB1	NM_001540	A_33_P3353242	7.03873	7.61603	0.577295	0.000136786	0.0145942
STEAP3	NM_182915	A_23_P90601	7.9145	8.4892	0.574704	0.00104356	0.0464911
RND2	NM_005440	A_33_P3382860	9.18226	9.75366	0.571406	0.0010372	0.0463929
SHC1	NM_003029	A_23_P200443	8.1422	8.71037	0.568169	3.16576e-05	0.00675536
RCC1	NM_001048194	A_23_P46309	6.81538	7.38182	0.56644	1.1708e-05	0.00396203
SLC17A9	NM_022082	A_33_P3229156	6.75144	7.31593	0.564496	0.000161432	0.0157677
HSPA5	NM_005347	A_24_P98411	10.0308	10.594	0.563252	6.5223e-05	0.0103151
IGFBP4	NM_001552	A_24_P382187	6.35968	6.92268	0.562998	4.73298e-05	0.00861762
SEMA4B	NM_020210	A_33_P3412016	6.63873	7.20074	0.562016	9.03827e-05	0.0122842
HSPA8	NM_153201	A_33_P3390758	11.7535	12.3151	0.561531	7.00836e-05	0.0107151
IQCD	NM_138451	A_24_P390060	8.64309	9.20186	0.558772	0.000933492	0.0438623
ZNF397	NM_032347	A_23_P304511	9.00969	9.5663	0.556618	0.00101561	0.0460616
MAOA	NM_000240	A_33_P3242543	9.22533	9.77968	0.554351	0.000715687	0.0374055
PLA1A	NM_015900	A_24_P294408	6.76556	7.31747	0.55191	0.000373373	0.0259954
GJA4	NM_002060	A_23_P1083	7.63873	8.51608	0.877351	2.76866e-05	0.0063748
RBM11	NM_144770	A_23_P342000	7.76626	8.31625	0.549991	0.00112269	0.0486577
APOL1	NM_145343	A_24_P87931	8.61658	9.1642	0.547623	0.000402106	0.0271875
PRKXP1	AK095793	A_33_P3618429	8.9248	10.236	1.31117	1.01e-08	0.000169986
IKZF2	NM_001079526	A_32_P114284	9.39527	9.93428	0.539013	0.000872632	0.0422277
TCEB2	NM_007108	A_23_P100392	9.69379	10.2327	0.538926	0.000766918	0.0389249
STIP1	NM_006819	A_24_P327815	7.71043	8.2467	0.536268	0.000527511	0.0315799
ENST00000457435	ENST00000457435	A_33_P3319815	6.9893	7.5208	0.531503	0.000888337	0.0426988
P4HA2	NM_001017973	A_33_P3394933	6.58435	7.11553	0.53118	0.000392642	0.0269315
PCBD1	NM_000281	A_23_P367405	9.95609	10.4843	0.528252	0.000133509	0.0144751
ABHD5	NM_016006	A_23_P250294	9.31852	9.8437	0.525182	2.60636e-05	0.00614917
KREMEN1	NM_001039570	A_23_P68851	9.34365	9.86578	0.522136	0.00106149	0.0469158
PLOD1	NM_000302	A_23_P137532	8.5583	9.07948	0.521188	5.31259e-05	0.00933332
CALR	NM_004343	A_33_P3292854	13.7357	14.2486	0.512957	1.35643e-05	0.00409396
CRELD1	NM_001031717	A_33_P3422479	6.86683	7.37906	0.512224	0.000362685	0.025743
A_33_P3232544	A_33_P3232544	A_33_P3232544	9.05454	9.56619	0.511652	0.00093596	0.0439167
KCNJ14	NM_170720	A_23_P130764	7.52097	8.02404	0.503069	0.000456562	0.0290794
SDF2L1	NM_022044	A_23_P6344	12.007	12.5083	0.501225	0.000188976	0.0177355
WNT5B	NM_030775	A_23_P53588	6.42366	6.921	0.497338	2.05436e-05	0.00537698
HSPD1	NM_002156	A_32_P25273	13.9934	14.4901	0.496744	0.000359472	0.0256322
PTP4A3	NM_032611	A_33_P3315906	7.3178	7.81373	0.495937	0.000193023	0.0179526
ASGR2	NM_080912	A_23_P130113	7.3587	7.84383	0.485132	0.000950742	0.0441756
NUDT3	NM_006703	A_23_P93389	9.51635	9.99981	0.483456	9.99419e-05	0.0128291
SIPA1L2	NM_020808	A_23_P137470	8.58914	9.07179	0.482651	0.000469483	0.0295275
PPAPDC1A	NM_001030059	A_24_P810290	9.43131	9.91317	0.481861	6.8179e-06	0.00295039
RBM14	NM_006328	A_23_P150255	11.1388	11.6149	0.476195	0.000655655	0.0358332
DHX34	NM_014681	A_33_P3315856	9.25188	9.71673	0.464854	0.000488011	0.0301093
ITPRIP	NM_033397	A_23_P340333	8.79465	9.25859	0.463944	0.000735074	0.0377128
FAM100B	NM_182565	A_24_P194714	12.2449	12.7083	0.463424	0.00119275	0.0499495
LOC729046	XR_015710	A_24_P213354	10.9866	11.4379	0.45128	0.000607829	0.0343978
ENST00000409468	ENST00000409468	A_33_P3325306	12.625	13.0761	0.451167	0.00103326	0.0462786
LAIR1	NM_002287	A_33_P3355230	8.03316	8.48268	0.449521	0.000691294	0.0369964
ATOH8	NM_032827	A_23_P142878	7.64454	8.09175	0.447204	0.000723561	0.037432
DUSP23	NM_017823	A_33_P3272698	10.3376	10.7774	0.439798	7.45194e-05	0.010902
A_33_P3223860	A_33_P3223860	A_33_P3223860	6.68569	7.12539	0.439706	0.000527872	0.0315799
TNFSF14	NM_003807	A_24_P237036	6.56219	6.99994	0.437751	0.000539418	0.0317045
RPLP0P3	CR612178	A_24_P341677	10.5749	11.0068	0.43195	0.000201091	0.018307
RPS2P32	NR_026676	A_23_P157196	12.0169	12.4443	0.42739	0.000108843	0.013166
UBFD1	NM_019116	A_23_P15123	8.52868	8.95253	0.423851	5.5058e-06	0.00259796
A_24_P375683	A_24_P375683	A_24_P375683	10.0417	10.4556	0.413841	0.000316054	0.0240647
CYP21A2	NM_000500	A_23_P257478	6.90371	7.31665	0.412942	0.00103056	0.0462786
APOC4	NM_001646	A_33_P3209162	7.09925	7.50776	0.40851	0.000667679	0.0363126
AK130930	AK130930	A_24_P195794	11.8399	12.245	0.40511	0.000466571	0.0295275
RPS15A	NM_001019	A_33_P3304282	12.1044	12.5079	0.403484	0.000106233	0.0130846
NANS	NM_018946	A_33_P3291776	10.036	10.4391	0.403055	0.000505768	0.0308077
A_24_P246692	A_24_P246692	A_24_P246692	11.9606	12.3634	0.402812	0.000110676	0.0131953
C17orf67	ENST00000397861	A_24_P583040	6.35224	6.75499	0.402746	5.54167e-05	0.00947229
ACRBP	NM_032489	A_33_P3396370	7.49992	7.89919	0.399269	0.000352196	0.0254109
A_24_P383330	A_24_P383330	A_24_P383330	11.6038	12.0025	0.398733	0.000626657	0.0349322
A_24_P135501	A_24_P135501	A_24_P135501	11.0092	11.4042	0.394991	0.000148824	0.0152491
A_24_P332482	A_24_P332482	A_24_P332482	11.616	12.0047	0.388689	0.000567909	0.0327164
A_24_P547010	A_24_P547010	A_24_P547010	12.9247	13.3089	0.38419	1.76867e-05	0.0047595
PTP4A1	NM_003463	A_23_P81770	11.3642	11.7471	0.382958	0.000609018	0.034407
RPS19	NM_001022	A_23_P119130	13.6258	14.006	0.380138	1.63584e-05	0.00452926
ECE2	NM_032331	A_23_P92261	6.96804	7.34747	0.379431	0.000101401	0.0128699
MYCBP	NM_012333	A_23_P201655	7.30386	7.68081	0.37695	0.000723029	0.037432
ENST00000449914	ENST00000449914	A_33_P3271711	6.84072	7.21466	0.373943	0.00107775	0.0473221
RBM4	NM_002896	A_33_P3378920	10.8047	11.1771	0.372392	0.000535128	0.0316573
FXR1	NM_001013439	A_23_P132784	10.9223	11.294	0.371629	0.000318435	0.0241362
A_24_P272548	A_24_P272548	A_24_P272548	9.83455	10.2054	0.3708	0.000611237	0.0344162
RPSA	NM_002295	A_24_P349743	11.6077	11.978	0.370385	0.000291357	0.0229671
DNAJB11	NM_016306	A_23_P166899	9.56378	9.93298	0.369203	0.00018775	0.0177183
ST13	NM_003932	A_32_P167791	9.71295	10.082	0.369092	0.00106688	0.0470915
KIAA1875	NR_024207	A_33_P3209541	6.7391	7.10471	0.365611	9.50994e-05	0.0125446
OR7C1	NM_198944	A_33_P3254246	5.91719	6.28158	0.364384	0.000169892	0.0164501
CCT3	NM_005998	A_23_P160631	12.3573	12.7148	0.357507	7.14826e-05	0.010727
A_24_P194962	A_24_P194962	A_24_P194962	12.7664	13.1172	0.350763	0.000130431	0.0144692
LOC728675	ENST00000434166	A_33_P3382125	7.53893	7.88608	0.34715	0.000900241	0.0429017
A_33_P3264955	A_33_P3264955	A_33_P3264955	9.55254	9.89851	0.345966	0.000551462	0.0322991
ENST00000379121	ENST00000379121	A_32_P150735	6.16649	6.51039	0.343897	0.000509665	0.0309054
RPL17	NM_000985	A_32_P158746	12.4185	12.7576	0.339042	0.00119137	0.0499495
PREP	NM_002726	A_23_P133755	8.11503	8.45258	0.337548	7.37992e-05	0.010844
RPS19	NM_001022	A_24_P134074	14.6306	14.967	0.336439	2.01121e-05	0.00530549
DERL2	NM_016041	A_23_P118749	9.08461	9.41669	0.332079	8.4975e-06	0.00327221
RPS14	ENST00000401695	A_24_P37939	7.19975	7.53155	0.331801	0.000307203	0.0238792
CBFB	NM_001755	A_23_P113634	9.93101	10.2624	0.33142	0.00104766	0.0466119
C1orf144	NM_015609	A_23_P115105	10.1692	10.4991	0.329848	0.000437857	0.0283283
GDPD5	NM_030792	A_24_P261567	6.8163	7.14349	0.327194	5.69083e-05	0.00955366
PDIA3	NM_005313	A_24_P101201	10.5533	10.8768	0.323489	0.0008537	0.0417528
RPL15	NM_002948	A_24_P257359	13.5715	13.892	0.32047	0.000109578	0.013166
A_24_P152983	A_24_P152983	A_24_P152983	12.4871	12.8075	0.320417	0.00116764	0.0494324
LYAR	NM_017816	A_23_P41327	8.31452	8.63229	0.317765	1.56866e-05	0.00445404
SAP30BP	NM_013260	A_24_P304987	9.95113	10.2687	0.317585	6.52739e-05	0.0103151
SLC9A9	NM_173653	A_32_P46214	10.3901	10.7056	0.315494	0.00104068	0.0464763
MAP1LC3B	NM_022818	A_32_P220715	9.64516	9.95608	0.310917	0.000623682	0.0348825
MXI1	NM_130439	A_23_P161399	10.8217	11.1314	0.309608	0.00115001	0.0491376
RPS5	NM_001009	A_33_P3300817	14.71	15.0186	0.308618	0.000482831	0.0299552
MTMR11	NM_181873	A_33_P3393927	6.731	7.03902	0.308027	0.0010821	0.0474509
YIPF1	NM_018982	A_23_P200239	9.51925	9.82283	0.303575	0.000644714	0.035525
CABP7	NM_182527	A_33_P3348061	7.58431	8.27843	0.694123	0.00050018	0.0306588
CALCOCO2	NM_005831	A_24_P330773	8.20972	8.5092	0.299477	0.000514083	0.0309207
RPLP0	NM_053275	A_32_P184796	13.7571	14.0492	0.292145	0.000579229	0.0330023
KARS	NM_001130089	A_33_P3449417	9.944	10.2339	0.289848	1.30055e-05	0.00407205
MLX	NM_170607	A_23_P164148	8.7567	9.04558	0.288881	0.00109708	0.0476834
FFAR3	NM_005304	A_33_P3401753	6.35882	6.64354	0.284724	6.48865e-05	0.0103151
ENST00000321930	ENST00000321930	A_33_P3235034	6.48684	6.7667	0.279859	0.000365474	0.0258209
A_24_P187023	A_24_P187023	A_24_P187023	12.3359	12.6107	0.274858	0.000843893	0.041394
ZNF788	NR_027049	A_33_P3252730	7.00797	7.27753	0.269555	0.000216042	0.0190469
HEYL	NM_014571	A_23_P430658	7.55501	8.27836	0.723348	6.19057e-05	0.0100458
A_24_P203726	A_24_P203726	A_24_P203726	14.638	14.9067	0.268741	0.000322191	0.0243109
SCNM1	NM_024041	A_23_P34968	11.2716	11.5363	0.264775	0.000285896	0.0227045
DQX1	NM_133637	A_23_P56659	6.4512	6.7152	0.263999	0.00096473	0.0442764
IGBP1	NM_001551	A_23_P171249	10.794	11.0537	0.259704	0.000500578	0.0306588
BNIPL	NM_001159642	A_33_P3400708	6.09625	6.35017	0.253916	0.000393096	0.0269315
RPS16	NM_001020	A_23_P208850	14.7357	14.9843	0.248591	0.000726757	0.0374418
NFKB1	NM_003998	A_23_P30024	8.29485	8.53512	0.240272	0.000469767	0.0295275
KLF15	NM_014079	A_23_P40805	6.39114	6.62588	0.234737	0.000616362	0.0345885
A_24_P42014	A_24_P42014	A_24_P42014	13.7779	14.011	0.233132	0.000129505	0.0144142
HSPB9	NM_033194	A_23_P416212	6.45028	6.6796	0.229318	0.00117627	0.0494445
RPL7A	NM_000972	A_23_P135084	14.7619	14.9734	0.211495	0.000150206	0.0152491
A_33_P3262890	A_33_P3262890	A_33_P3262890	12.4659	12.6761	0.210227	0.00102688	0.046178
LOC100130721	XR_037174	A_33_P3395636	6.02401	6.21707	0.193056	0.00113873	0.04891
ENST00000377499	ENST00000377499	A_33_P3280796	5.94321	6.11704	0.173831	0.000806602	0.0403223
SLC23A3	NM_144712	A_23_P28246	5.94394	6.11717	0.173223	0.001132	0.0488818
PLOD1	NM_000302	A_33_P3358824	6.16823	6.33364	0.165403	0.000759802	0.0386852
A_24_P401090	A_24_P401090	A_24_P401090	5.85455	5.99018	0.135633	0.00101006	0.0459147
ZKSCAN2	NM_001012981	A_32_P64096	8.78438	8.5918	-0.192578	0.00113659	0.0488818
PARK2	NM_004562	A_23_P147465	7.34948	7.14607	-0.203413	0.000628835	0.0349954
PDE4DIP	NM_022359	A_33_P3333982	10.7314	11.3494	0.61798	0.000564331	0.0327164
DNAJC19	NM_145261	A_33_P3362869	10.24	10.027	-0.212975	0.000351057	0.025402
C2CD4D	NM_001136003	A_33_P3240244	6.97751	6.74927	-0.228246	0.00109736	0.0476834
BAG1	NM_004323	A_33_P3290919	11.3903	11.1503	-0.240028	0.000850779	0.0416708
LOC100133315	NR_029192	A_33_P3335571	6.67904	6.4378	-0.241246	0.00082074	0.0407923
MFSD8	NM_152778	A_23_P30162	7.26487	7.02234	-0.242529	0.000899436	0.0429017
DPP3	NM_130443	A_23_P116091	8.49927	8.25435	-0.244917	0.000462182	0.0293258
DTWD2	NM_173666	A_23_P346982	6.99168	6.74465	-0.247028	0.00115511	0.0492314
COX7A2	NM_001865	A_23_P81690	13.8982	13.6502	-0.248042	0.000730878	0.037555
CUTA	NM_015921	A_23_P214678	13.5243	13.2761	-0.248171	0.000325856	0.0243679
SEPSECS	NM_016955	A_23_P167201	6.83274	6.58204	-0.250698	0.00115944	0.0492314
MECR	NM_001024732	A_23_P114808	8.26071	8.00929	-0.251427	0.000861096	0.0419308
DDX1	NM_004939	A_23_P108554	11.3405	11.0889	-0.251609	0.000314657	0.0240647
C6orf72	NM_138785	A_23_P31109	10.5505	10.2985	-0.252046	0.000574229	0.0328852
NDUFV3	NM_021075	A_23_P211285	11.2632	11.0102	-0.252949	0.000718627	0.037432
COX8A	NM_004074	A_23_P52639	13.4028	13.1495	-0.253309	0.000988284	0.0452316
HELQ	NM_133636	A_23_P92614	7.35818	7.1013	-0.256877	0.00070428	0.0370405
RRP7A	NM_015703	A_23_P29303	6.98915	6.73215	-0.257004	0.000437717	0.0283283
LOC645158	XR_078662	A_33_P3606465	6.21776	5.9602	-0.257556	0.000669354	0.0363448
LSMD1	NM_032356	A_33_P3239879	13.9967	13.7375	-0.259247	0.000419367	0.0278642
FARP2	NM_014808	A_23_P90855	7.47676	7.21743	-0.259328	7.65768e-05	0.0111111
TCEAL4	NM_024863	A_23_P259166	13.0659	12.8054	-0.260504	0.000569572	0.0327164
L3MBTL4	NM_173464	A_24_P391918	6.66334	6.40127	-0.262065	0.000997519	0.0455251
C12orf41	NM_017822	A_24_P67929	6.82843	6.56289	-0.265543	0.000739567	0.0378275
C16orf42	NM_001001410	A_23_P88753	9.60021	9.33305	-0.267161	0.000535528	0.0316573
ACSL5	NM_203380	A_33_P3217983	8.7589	9.3966	0.637703	0.000223449	0.0194947
ZDHHC4	NM_018106	A_23_P157147	10.9337	10.6659	-0.26777	0.000502206	0.0307024
NAF1	NM_138386	A_24_P223163	6.77699	6.50703	-0.269959	0.000366713	0.0258209
OVCA2	NM_080822	A_23_P118462	11.1818	10.9079	-0.273886	0.000597179	0.0339672
NOL6	NM_022917	A_24_P21410	7.14259	6.86831	-0.274275	0.00095446	0.0441756
NAT11	NM_024771	A_23_P35782	6.53482	6.25528	-0.279545	0.000537453	0.0317003
CHMP1B	NM_020412	A_33_P3276475	9.47772	9.19799	-0.279732	0.000956204	0.0441858
ZNF10	NM_015394	A_24_P215475	8.43489	8.15495	-0.279943	0.000154929	0.0154019
BAG1	NM_004323	A_23_P146654	12.4317	12.1517	-0.28003	0.000193984	0.0179526
TUBGCP5	NM_052903	A_23_P152038	7.21875	6.93795	-0.280804	0.000227592	0.0197533
EFHA1	NM_152726	A_23_P76598	11.3022	11.0204	-0.281863	0.00100013	0.0455251
GOT2	NM_002080	A_33_P3414482	12.8836	12.6015	-0.282171	0.000841609	0.0413425
LOC641510	BC030809	A_33_P3829391	6.16956	5.8872	-0.282355	3.37571e-05	0.00685413
COG6	NM_020751	A_23_P53866	9.99128	9.7063	-0.284985	0.000737077	0.0377577
NDUFS1	NM_005006	A_23_P131365	12.2007	11.9152	-0.285528	0.000727558	0.0374418
PDHX	NM_003477	A_23_P36266	9.13582	8.84563	-0.290188	0.000568186	0.0327164
OTUD4	NM_017493	A_23_P69637	6.76797	6.47626	-0.29171	0.000328967	0.0244211
DDX51	NM_175066	A_33_P3284472	7.44131	7.14958	-0.291723	0.000649743	0.0356263
FAM104A	NM_032837	A_23_P78289	9.76718	9.47165	-0.295524	0.000610258	0.0344162
PTPRA	NM_002836	A_23_P28869	11.3872	11.0913	-0.295897	0.000211302	0.0188052
SLC4A8	NM_004858	A_23_P72912	7.06878	6.77201	-0.296765	0.000835478	0.0411261
PDE8B	NM_003719	A_24_P197537	9.67638	10.2474	0.571051	0.00068776	0.0368661
TGFBRAP1	NM_004257	A_23_P120146	8.05377	7.75626	-0.297514	0.000212614	0.0188052
C6orf72	NM_138785	A_33_P3332438	9.19798	8.89996	-0.298024	0.000279504	0.0224961
MRPL19	ENST00000409374	A_33_P3223088	6.63309	6.33488	-0.298215	0.00114899	0.0491376
HEBP1	NM_015987	A_23_P117082	11.4448	11.1462	-0.298624	0.00117099	0.0494445
PARL	NM_018622	A_33_P3335451	11.0749	10.7738	-0.301117	0.000267835	0.0217791
ENST00000366856	ENST00000366856	A_33_P3318746	8.70062	8.39837	-0.302251	0.000534656	0.0316573
ENST00000445977	ENST00000445977	A_33_P3373715	7.02992	6.72539	-0.304533	0.000104148	0.0130437
BZW1	NM_014670	A_33_P3334548	8.65312	8.3463	-0.306816	0.000804909	0.040308
ZIM2	NM_015363	A_23_P78479	7.24628	6.93944	-0.306839	0.000189998	0.0177508
ZNF699	NM_198535	A_33_P3350778	6.74856	6.4405	-0.308069	4.65694e-05	0.00852876
MPPE1	NM_023075	A_23_P27285	9.87383	9.56235	-0.311482	0.000807759	0.0403223
MKKS	NM_170784	A_33_P3388135	9.21603	8.90372	-0.312318	0.000402765	0.0271875
KIF22	NM_007317	A_33_P3350634	8.09654	7.78248	-0.314058	0.000881589	0.0424964
LOH12CR1	NM_058169	A_23_P257593	8.61517	8.29997	-0.315208	0.000101871	0.0128699
C11orf2	NM_013265	A_23_P104641	10.8104	10.4952	-0.315276	0.000105919	0.0130846
POMGNT1	NM_017739	A_33_P3284197	12.6109	12.2954	-0.315522	0.000868182	0.0420924
ZNF136	NM_003437	A_23_P67312	8.03165	7.7161	-0.31555	0.00109606	0.0476834
ATP5S	NM_015684	A_33_P3279798	8.82624	8.51001	-0.316236	0.000865764	0.0420924
SAMM50	NM_015380	A_23_P29318	9.6981	9.38174	-0.316359	0.000476208	0.0298204
MTFR1	NM_014637	A_24_P346587	7.20889	6.89245	-0.316435	0.000565406	0.0327164
DENND2C	ENST00000369540	A_23_P46315	7.10148	6.78494	-0.316544	0.000720918	0.037432
NGFRAP1	NM_014380	A_23_P45524	13.9813	13.663	-0.318296	0.0006837	0.0368125
PJA1	NM_022368	A_33_P3217347	11.2165	10.898	-0.318562	0.00119174	0.0499495
COX6C	NM_004374	A_23_P8900	13.2111	12.8895	-0.321606	0.000451365	0.0288031
DPP8	NM_130434	A_33_P3577671	10.7709	10.449	-0.321908	0.000486004	0.0300633
BTBD9	NM_152733	A_32_P113566	6.91389	6.59182	-0.32207	0.000821904	0.0407923
EIF2S1	NM_004094	A_33_P3402171	8.74246	8.41994	-0.322523	0.00050757	0.0308614
LMBR1	NM_022458	A_33_P3343996	6.75327	6.4296	-0.323664	0.000684318	0.0368125
TTC19	NM_017775	A_23_P50008	9.66314	9.33907	-0.324074	0.000149668	0.0152491
CDC27	NM_001114091	A_33_P3360718	7.48766	7.16245	-0.32521	0.00113193	0.0488818
HACL1	NM_012260	A_23_P121182	9.19117	8.86378	-0.327393	0.000113449	0.013368
TGM2	NM_004613	A_32_P86763	7.26515	7.81547	0.550318	0.000461072	0.0293109
ATG2A	NM_015104	A_33_P3257312	10.7428	10.4142	-0.32861	0.000599722	0.0340541
ZNF789	NM_001013258	A_33_P3311775	8.12537	7.79584	-0.329534	0.000940403	0.0439602
KLHL7	NM_018846	A_33_P3366102	7.42171	7.09194	-0.329771	0.000784101	0.0394429
FARSB	NM_005687	A_23_P165355	7.97662	7.64638	-0.330247	0.000643965	0.035525
UCHL5	NM_015984	A_24_P188325	8.92255	8.59207	-0.330483	0.000963041	0.0442764
ATF2	NM_001880	A_24_P128145	7.59619	7.26506	-0.331132	7.95237e-05	0.0114344
RRAGA	NM_006570	A_23_P169117	12.5172	12.1852	-0.331979	0.00020063	0.018307
INHBA	NM_002192	A_23_P122924	7.32376	8.00274	0.678981	3.8084e-05	0.00747574
ERLEC1	NM_015701	A_33_P3325018	11.0115	10.6779	-0.333544	9.74896e-05	0.0126593
LOC730092	BC009198	A_23_P3552	7.46454	7.13064	-0.333897	0.000625827	0.0349322
ZFP82	NM_133466	A_33_P3415560	7.33922	7.00475	-0.334476	0.000226383	0.0196995
BZW1	NM_014670	A_24_P362572	9.12554	8.7895	-0.336037	0.000325631	0.0243679
DYNC1H1	NM_001376	A_23_P128706	13.2499	12.9133	-0.336652	9.09701e-05	0.0122842
TNFRSF6B	NM_032945	A_33_P3305571	6.79099	7.29637	0.505384	0.000332733	0.0246076
SLCO3A1	NM_013272	A_24_P336276	9.61389	9.27383	-0.340055	0.00117608	0.0494445
POLR2G	NM_002696	A_33_P3396522	12.0463	11.706	-0.340269	0.000562531	0.0327164
PUF60	NM_014281	A_24_P149645	11.5284	11.1881	-0.340314	0.000184574	0.0175842
GZF1	NM_022482	A_23_P433188	7.73077	7.38919	-0.341574	0.000726426	0.0374418
VEZT	NM_017599	A_23_P204609	8.90265	8.56064	-0.342014	0.000372827	0.0259954
MRPS18B	NM_014046	A_23_P59107	11.997	11.6547	-0.342365	4.7559e-06	0.00234313
ZNF174	NM_001032292	A_33_P3233774	6.97373	6.62698	-0.346758	0.000402545	0.0271875
ATP5C1	NM_005174	A_23_P63655	9.39979	9.0527	-0.347085	0.000277174	0.0223756
FXC1	NM_012192	A_33_P3243657	11.2474	10.9002	-0.347149	1.12358e-05	0.00394704
SLC4A8	NM_004858	A_24_P75680	6.94287	6.59566	-0.347206	0.000232626	0.0200523
AFG3L2	NM_006796	A_23_P135454	7.5771	7.2297	-0.347396	0.000513218	0.0309207
LOC148413	NR_015434	A_24_P781757	7.64152	7.29246	-0.349062	0.00107182	0.0471233
A_33_P3334575	A_33_P3334575	A_33_P3334575	8.4255	8.07552	-0.349983	0.000443644	0.0284731
ZGPAT	NM_032527	A_23_P218654	9.90691	9.55628	-0.350632	0.000354153	0.025461
HNRPDL	NM_031372	A_24_P9090	10.853	10.5021	-0.350895	0.000779465	0.0392686
RTN4	NM_020532	A_33_P3233550	15.6562	15.305	-0.351219	0.000426267	0.0280016
TMEM5	NM_014254	A_23_P2446	9.37355	9.02224	-0.351302	0.000568643	0.0327164
CTU1	NM_145232	A_33_P3395971	7.96584	8.67188	0.706034	7.01095e-05	0.0107151
LOC93622	NR_015433	A_23_P428992	10.0609	9.70836	-0.35254	8.1075e-06	0.0032514
MAGEH1	NM_014061	A_23_P34144	12.5071	12.1532	-0.353922	0.00117472	0.0494445
ENST00000369751	ENST00000369751	A_33_P3348194	6.67011	6.31608	-0.354036	0.000313277	0.0240647
LZIC	NM_032368	A_23_P784	10.9805	10.6263	-0.354154	0.000397391	0.0271149
ARMC1	NM_018120	A_32_P234827	10.1786	9.82405	-0.354527	0.000873495	0.0422277
HYI	NM_031207	A_23_P160582	10.0631	9.70818	-0.354924	0.000565745	0.0327164
NENF	NM_013349	A_23_P137948	13.054	12.6988	-0.355151	0.000419667	0.0278642
TM2D1	NM_032027	A_23_P148959	10.4283	10.0731	-0.35523	0.000127903	0.0143641
OXNAD1	NM_138381	A_24_P927189	7.22457	6.86864	-0.355929	0.00015073	0.015256
C2orf72	NM_001144994	A_33_P3237207	7.86803	7.51066	-0.357372	0.000100074	0.0128291
SYNGR1	NM_145731	A_33_P3379091	7.02033	6.66163	-0.358707	0.00053578	0.0316573
LYRM2	NM_020466	A_23_P42042	8.7357	8.37683	-0.358872	0.000634935	0.0351597
BAIAP2L2	NM_025045	A_23_P379034	8.72679	9.27017	0.543382	0.000513742	0.0309207
MPV17L	NM_173803	A_23_P357351	7.181	6.8209	-0.360102	7.18997e-05	0.010727
SLC25A40	NM_018843	A_23_P432626	6.88919	6.52856	-0.360628	6.48723e-05	0.0103151
LOH12CR2	NR_024061	A_32_P89730	8.69919	8.33798	-0.36121	0.000907102	0.043106
ABCE1	NM_002940	A_23_P41380	9.32443	8.96284	-0.361582	0.000434996	0.0283139
ANXA7	NM_004034	A_23_P86570	9.28566	8.92343	-0.36223	0.000709369	0.0372288
DPF2	NM_006268	A_23_P127446	10.6206	11.3772	0.75668	1.128e-07	0.000314833
PARP2	NM_005484	A_23_P163027	10.2766	9.91406	-0.362518	7.27299e-05	0.0107455
ST7L	NM_138729	A_33_P3223239	7.95074	7.5882	-0.362541	3.60886e-05	0.00715409
MAPK9	NM_001135044	A_33_P3400192	6.7548	6.3922	-0.362604	0.000684243	0.0368125
PIGK	NM_005482	A_24_P379512	8.21508	7.85064	-0.364443	0.000315898	0.0240647
LRIG2	NM_014813	A_23_P160869	8.00655	7.64191	-0.364642	0.000171493	0.0165572
MBLAC1	NM_203397	A_24_P221198	7.78223	7.41758	-0.364656	0.000517695	0.0310821
BC111488	BC111488	A_33_P3346936	7.02088	6.65474	-0.366135	8.89002e-05	0.0122015
PPP1R12B	NM_032105	A_23_P201790	12.0607	11.6945	-0.366196	5.50995e-05	0.00947229
SLC25A36	NM_001104647	A_33_P3228762	10.5835	10.217	-0.366471	7.20429e-05	0.010727
ACBD6	NM_032360	A_23_P52127	10.6072	10.2399	-0.367258	1.77583e-05	0.0047595
ICA1L	NM_178231	A_24_P211797	6.74045	6.37215	-0.368304	0.000486367	0.0300633
ZBTB24	NM_014797	A_23_P134147	8.74426	8.37593	-0.368333	0.000413784	0.0276147
NDUFB10	NM_004548	A_23_P118105	11.9489	11.5804	-0.368505	1.24217e-05	0.00403935
A_32_P57702	A_32_P57702	A_32_P57702	11.6953	11.3251	-0.370232	0.000263958	0.0216554
NUDT14	NM_177533	A_23_P414978	7.3576	6.98688	-0.370716	0.000388035	0.026694
ATRN	NM_139322	A_23_P79931	8.60133	8.23043	-0.370894	1.48959e-05	0.0044163
HNRNPK	NM_002140	A_24_P380919	11.5306	11.1591	-0.371577	0.000242911	0.0205505
RABGGTA	NM_004581	A_23_P54223	7.00528	6.63183	-0.373453	0.000114062	0.013368
ANKRD13A	NM_033121	A_24_P307572	8.55707	8.18229	-0.37478	0.000293333	0.0230146
SYT14	NM_153262	A_24_P402415	7.227	6.8517	-0.375301	0.000655042	0.0358332
MTR	NM_000254	A_23_P200936	9.71544	9.33848	-0.376961	0.000358906	0.0256322
NUP107	NM_020401	A_23_P14062	9.75381	9.3765	-0.377318	0.000901677	0.042909
RBM12	NM_006047	A_23_P502832	8.57899	8.19996	-0.379029	0.00011149	0.0132452
MFN1	NM_033540	A_23_P80648	8.39267	8.01309	-0.379573	0.000396431	0.0271045
ATPIF1	NM_016311	A_33_P3228385	11.8006	11.419	-0.381579	0.000431326	0.0281682
DHX57	NM_198963	A_23_P16908	7.24514	6.86333	-0.381804	0.000829198	0.0410337
EWSR1	NM_013986	A_33_P3339536	10.8917	10.5092	-0.382527	0.000109356	0.013166
C4orf43	NM_018352	A_23_P167269	8.68585	8.30319	-0.382656	0.000578049	0.0329911
HNRNPD	NM_031370	A_23_P58353	11.7063	11.3235	-0.382823	4.26787e-05	0.00803271
GLOD4	NM_016080	A_23_P78268	8.70763	8.3247	-0.382936	1.95947e-05	0.00521001
C11orf58	NM_001142705	A_24_P675386	8.21621	7.83311	-0.383101	0.000441381	0.0284154
COG1	NM_018714	A_33_P3372580	10.2924	9.90794	-0.38445	0.000531467	0.0316573
SMCR7	NM_139162	A_23_P501372	8.44902	8.0641	-0.384917	6.20704e-05	0.0100458
C21orf57	NM_058181	A_32_P18547	8.83135	8.44622	-0.385127	7.28082e-05	0.0107455
NFIB	NM_005596	A_33_P3320082	7.80111	7.41573	-0.38538	8.89196e-05	0.0122015
ZNF33A	NM_006954	A_33_P3238196	8.0188	7.63329	-0.38551	2.14589e-05	0.00551547
CDK5RAP2	NM_018249	A_33_P3389060	8.35419	7.96841	-0.385772	0.000448281	0.0286609
PNKP	NM_007254	A_33_P3402918	8.61449	8.22802	-0.386473	0.000143783	0.0151126
ST6GAL2	NM_032528	A_23_P429425	6.69636	6.30912	-0.387236	0.000684312	0.0368125
KIF2A	NM_001098511	A_33_P3407065	9.79123	9.40384	-0.387392	0.00026937	0.0218509
NF1	NM_000267	A_24_P1919	7.70827	7.32082	-0.38745	0.000550386	0.0322925
ORC5L	NM_181747	A_24_P394698	7.48565	7.09715	-0.388501	0.000257247	0.0213854
WHSC1	NM_007331	A_23_P307328	8.37138	7.98235	-0.38903	0.000262476	0.0216554
ZNF853	NM_017560	A_23_P302207	7.55181	7.16262	-0.389191	2.857e-06	0.00174026
IMMP1L	NM_144981	A_23_P203305	7.765	7.37505	-0.389945	0.00070258	0.0370092
PARL	NM_018622	A_24_P221883	8.4731	8.0829	-0.3902	0.000939901	0.0439602
ENST00000377039	ENST00000377039	A_33_P3362353	8.13089	7.74046	-0.39043	9.87735e-05	0.0127765
CCDC23	NM_199342	A_33_P3328736	10.1148	9.72416	-0.390669	0.000166867	0.016204
RPS29	NM_001030001	A_33_P3282840	9.24132	9.72938	0.488053	0.000710083	0.0372288
PCDH10	NM_020815	A_33_P3294598	8.44	8.04902	-0.390982	0.00063178	0.035101
SPG7	NM_003119	A_23_P433990	9.9054	9.51385	-0.391551	2.18208e-05	0.00553818
FLJ46446	AK128305	A_33_P3357097	7.40216	7.01017	-0.391988	0.000899775	0.0429017
ABCA3	NM_001089	A_23_P140876	10.2361	9.84412	-0.392003	0.000193586	0.0179526
HGSNAT	NM_152419	A_23_P112061	9.50791	9.1148	-0.393101	0.000263736	0.0216554
C5orf44	NM_024941	A_23_P121825	8.26897	7.87443	-0.394545	0.000968907	0.0444054
CCBL2	NM_001008661	A_23_P46017	7.936	7.54114	-0.39486	2.29742e-05	0.00565942
CD200	NM_001004196	A_33_P3370575	7.53034	7.13512	-0.39522	0.00108986	0.0476834
METTL8	NM_024770	A_23_P56553	8.28003	7.88466	-0.395365	0.000894913	0.0428306
RABEP2	NM_024816	A_33_P3424207	9.8119	9.41648	-0.395425	0.000123492	0.0141202
XPA	NM_000380	A_23_P60283	9.45651	9.05673	-0.399781	7.6e-07	0.000727458
RNH1	NM_002939	A_24_P415601	11.0396	10.6398	-0.399805	0.000492905	0.0303386
C17orf75	NM_022344	A_23_P15639	7.97987	7.5799	-0.39997	0.000149566	0.0152491
GPX4	NM_001039848	A_33_P3309662	11.7802	11.3784	-0.40184	0.00115129	0.0491376
LIN7B	NM_022165	A_23_P164912	9.76836	9.36571	-0.402645	8.89624e-05	0.0122015
TLN2	NM_015059	A_33_P3264815	9.44105	9.88534	0.444293	0.000136398	0.0145942
ZNF839	NM_018335	A_24_P361158	7.96948	7.56622	-0.403261	0.000886906	0.0426913
C14orf80	NM_001134875	A_23_P431381	8.6035	8.19919	-0.404305	0.000117563	0.0136757
RFX5	NM_000449	A_33_P3382162	8.79034	8.38519	-0.405146	0.000831475	0.0410857
FLJ36644	XM_001718237	A_33_P3374778	7.03687	6.6293	-0.407574	0.00117225	0.0494445
MRPS25	NM_022497	A_33_P3266444	8.40637	7.99855	-0.407817	0.0010954	0.0476834
NDN	NM_002487	A_23_P106405	9.51275	9.10492	-0.407828	0.00028473	0.0227045
LMBR1	NM_022458	A_23_P300728	8.45831	8.05047	-0.407844	0.000301005	0.0235614
ABCA11P	NR_002451	A_23_P92602	6.8872	6.47907	-0.408128	0.000329482	0.0244211
CDC10L	NR_027269	A_33_P3309034	8.73669	8.3254	-0.411285	0.000188991	0.0177355
A_24_P256037	A_24_P256037	A_24_P256037	11.9968	12.3365	0.339622	0.000238308	0.020315
MRPL52	NM_181304	A_24_P57730	8.34578	8.83471	0.488928	4.1008e-06	0.00224054
RPL35	NM_007209	A_32_P72940	12.641	12.9097	0.268747	0.000917042	0.043362
A_24_P401100	A_24_P401100	A_24_P401100	13.4711	13.773	0.301919	0.000480609	0.0298744
NP100974	NP100974	A_33_P3420167	12.5179	12.852	0.334175	0.000238938	0.020317
RPS17	NM_001021	A_24_P418418	14.635	14.8491	0.2141	0.0010167	0.0460616
FKTN	NM_001079802	A_23_P216622	6.62716	6.36933	-0.257827	8.92297e-05	0.0122015
FAM76A	NM_001143912	A_32_P196854	8.03457	7.6225	-0.412066	0.000292613	0.023012
HGSNAT	NM_152419	A_24_P16378	6.5926	6.32499	-0.267613	0.00107109	0.0471233
IARS2	NM_018060	A_23_P74843	10.3535	10.0259	-0.327617	1.01431e-05	0.00369363
ASB1	NM_001040445	A_23_P165360	7.27177	7.06011	-0.211665	0.000131346	0.0144751
PCGF6	NM_001011663	A_23_P115703	7.26451	6.85242	-0.412088	9.51088e-05	0.0125446
TMEM185B	NR_000034	A_23_P119789	7.06037	6.7274	-0.33297	0.000288147	0.0227677
ZNF33A	NM_006974	A_24_P212129	8.84753	8.47686	-0.370672	3.29992e-05	0.00678798
FLJ42875	NR_024371	A_24_P366787	7.8737	7.46066	-0.413044	0.000477184	0.0298258
PACRGL	NM_145048	A_24_P311604	7.98377	7.732	-0.251763	0.000441897	0.0284154
CDS2	NM_003818	A_24_P271363	9.25003	8.97917	-0.27086	0.000633882	0.0351595
WDR44	NM_019045	A_33_P3239736	8.25706	7.90591	-0.351157	0.00019946	0.018307
RBBP9	NM_006606	A_33_P3365047	6.92697	6.59007	-0.336898	0.000145422	0.0151785
PSMB1	NM_002793	A_24_P233570	13.7733	13.4987	-0.274594	0.000992604	0.0453673
GCSH	NM_004483	A_23_P117933	12.8926	12.479	-0.413609	5.78763e-05	0.00964662
PRKAA1	NM_206907	A_33_P3312212	7.18108	6.82048	-0.360606	0.000175058	0.0168045
UCHL3	NM_006002	A_23_P76690	9.42199	9.00818	-0.41381	5.2085e-06	0.00249276
RABEP2	NM_024816	A_33_P3239152	9.96256	9.54849	-0.414071	0.000200288	0.018307
LRPPRC	NM_133259	A_24_P26073	9.76341	9.48559	-0.277812	0.000940824	0.0439602
GTF2E1	NM_005513	A_23_P211748	8.64891	8.3212	-0.327711	0.00102377	0.0461467
ZDHHC24	NM_207340	A_24_P259276	8.10987	7.72052	-0.389353	7.037e-05	0.0107151
FTSJD2	NM_015050	A_23_P374149	8.46891	7.9736	-0.495315	2.419e-07	0.000476632
ENST00000378861	ENST00000378861	A_33_P3370310	6.56971	6.25374	-0.315972	0.000856472	0.0417664
ENST00000382464	ENST00000382464	A_33_P3278868	8.00285	7.53473	-0.468115	7.3346e-06	0.00307155
MFSD8	NM_152778	A_24_P303080	7.88832	7.54061	-0.347711	0.000131444	0.0144751
DCTN2	NM_006400	A_23_P360167	11.4819	11.1538	-0.328167	3.11918e-05	0.00675536
SYNRG	NM_007247	A_23_P396626	7.83848	7.49852	-0.339965	5.8967e-05	0.00973159
TRMT6	NM_015939	A_23_P210747	8.00827	7.5938	-0.414469	3.81575e-05	0.00747574
UQCRC1	NM_003365	A_23_P132675	11.1475	10.7908	-0.356675	0.000423545	0.0279155
UGGT2	NM_020121	A_24_P44341	7.419	7.00406	-0.41494	0.000562547	0.0327164
DDX46	NM_014829	A_32_P105195	7.963	7.54763	-0.415365	0.000233431	0.0200523
MESDC2	NM_015154	A_33_P3244317	8.0777	7.65997	-0.417729	0.000265666	0.0216554
ZNF33A	NM_006954	A_24_P212127	8.26361	7.86749	-0.39612	0.00041253	0.027586
MBTPS2	NM_015884	A_23_P114095	7.62181	7.16394	-0.457868	5.0437e-06	0.00244888
ITFG2	NM_018463	A_23_P204417	8.57209	8.1542	-0.417892	0.00014781	0.0152491
SLC25A46	NM_138773	A_23_P133375	8.64152	8.22238	-0.419136	0.000254808	0.0212883
PWP1	NM_007062	A_23_P395524	10.4397	9.95643	-0.483302	3.601e-07	0.00060326
DAK	NM_015533	A_33_P3245006	7.33221	6.91266	-0.419554	0.000184754	0.0175842
DAK	NM_015533	A_33_P3245011	10.637	10.2165	-0.420503	0.000683171	0.0368125
HYI	NM_031207	A_23_P200976	11.0431	10.6225	-0.420587	8.29709e-05	0.0117783
REC8	NM_001048205	A_33_P3278941	9.70196	9.28025	-0.421708	0.00028202	0.0226034
SETD4	NM_017438	A_23_P211106	8.0436	7.62155	-0.422052	0.000327229	0.0244161
FBXO4	NM_012176	A_24_P171873	7.32899	6.94549	-0.383505	0.00013517	0.014561
SNX4	NM_003794	A_23_P72568	9.69651	9.27366	-0.422856	0.000286166	0.0227045
SELT	NM_016275	A_33_P3290672	11.9767	11.503	-0.473736	8.3585e-06	0.00327221
PYROXD1	NM_024854	A_33_P3278265	8.61837	8.19532	-0.423051	0.000921431	0.0434786
OSBPL1A	NM_080597	A_33_P3308534	8.07018	7.5269	-0.54328	1.024e-07	0.000314833
TMEM18	NM_152834	A_24_P385585	6.93646	6.51155	-0.424913	0.00070194	0.0370092
ACADM	NM_000016	A_23_P96761	9.1528	8.72743	-0.425365	0.000770369	0.0389863
TXNDC9	NM_005783	A_24_P362646	8.25004	7.85049	-0.399547	0.00116405	0.0493645
KIT	NM_001093772	A_33_P3303245	6.69666	6.27039	-0.426265	0.00043007	0.028141
FAM127C	NM_001078173	A_33_P3296707	7.87727	7.31854	-0.558723	3.939e-07	0.000607376
NSMCE4A	NM_017615	A_24_P189458	8.24417	7.81773	-0.426436	0.000158591	0.015581
NUFIP1	NM_012345	A_23_P36939	7.31986	6.89302	-0.426839	0.000107614	0.0131434
GFM1	NM_024996	A_23_P155288	9.07598	8.64836	-0.427616	1.59459e-05	0.00446303
ZFYVE20	NM_022340	A_24_P85181	9.78057	9.35265	-0.427919	6.0626e-06	0.00278232
PYROXD1	NM_024854	A_33_P3374293	8.58629	8.15492	-0.431371	0.0007773	0.0392185
TMEM134	NM_025124	A_23_P161522	10.4096	9.97787	-0.431748	3.24154e-05	0.00678482
TAS2R45	NM_176886	A_23_P303851	7.2125	6.77921	-0.433288	0.000741079	0.037847
COX11	NM_004375	A_24_P73943	7.78765	7.35378	-0.433864	0.000156611	0.0154772
ENST00000402468	ENST00000402468	A_33_P3251227	9.44324	9.00936	-0.433881	0.00047263	0.0296518
GCAT	NM_014291	A_23_P40657	7.40206	6.96716	-0.434897	0.000222577	0.0194716
PIGT	NM_015937	A_23_P79842	12.3711	11.935	-0.436097	0.000685661	0.0368125
TMEM135	NM_022918	A_24_P181101	7.45988	7.02322	-0.436657	0.000258445	0.0214194
RCHY1	NM_015436	A_33_P3263841	7.18915	6.75186	-0.437294	0.000408129	0.0274011
FGFR2	NM_022970	A_24_P206624	9.21829	8.78037	-0.437926	0.000570306	0.0327164
SLC35B2	NM_178148	A_33_P3368039	9.33925	8.90124	-0.438009	0.00111707	0.048477
SARS2	NM_017827	A_23_P90484	7.96616	7.52814	-0.438016	0.000110079	0.0131709
IBTK	NM_015525	A_23_P358995	10.932	10.4938	-0.43823	0.000153329	0.0153339
SLC35A5	NM_017945	A_23_P255057	10.0058	9.56706	-0.438695	0.000228835	0.0198099
AGGF1	NM_018046	A_33_P3227666	8.15938	7.71746	-0.441922	0.000305293	0.0238413
CCDC115	NM_032357	A_23_P17074	10.642	10.1967	-0.445273	2.563e-06	0.00165126
GLT8D4	NM_001080393	A_24_P118196	7.4593	7.01093	-0.448364	0.000953693	0.0441756
C6orf226	NM_001008739	A_32_P149174	8.7501	8.30102	-0.44908	0.000145433	0.0151785
ATP1B1	NM_001677	A_23_P62932	15.2931	14.8412	-0.451898	0.00113527	0.0488818
NSMCE4A	NM_017615	A_23_P75204	10.0025	9.55012	-0.452423	5.8192e-06	0.0027077
C20orf29	NM_018347	A_23_P57137	7.91446	7.46156	-0.452906	0.00100008	0.0455251
CCNL2	NM_001039577	A_24_P376339	8.20186	7.74859	-0.45327	0.000646269	0.0355522
EIF2AK2	NM_001135652	A_33_P3224858	7.72663	7.31418	-0.412457	0.00109599	0.0476834
DNM1L	NM_012062	A_24_P743907	9.35698	8.90314	-0.453835	1.34251e-05	0.0040888
GINS3	NM_022770	A_23_P152136	8.43814	7.98413	-0.454003	8.10216e-05	0.0115803
BRWD1	NM_001007246	A_24_P861009	9.49535	9.04101	-0.454337	0.000209288	0.0188052
ING3	NM_198267	A_33_P3356711	7.42718	6.97268	-0.454501	9.65319e-05	0.0126329
NHEDC1	NM_139173	A_23_P415611	6.91921	6.46307	-0.45614	0.0010329	0.0462786
CLCC1	NM_001048210	A_33_P3412160	8.51298	8.05538	-0.457601	2.4208e-06	0.00162202
C10orf84	NM_022063	A_33_P3297642	9.28295	8.82532	-0.457625	7.0823e-06	0.00300341
C6orf120	NM_001029863	A_33_P3368675	7.90673	7.44461	-0.462122	7.66121e-05	0.0111111
HNRNPD	NM_031370	A_24_P123245	8.85787	8.39902	-0.458849	0.000112919	0.0133675
DIXDC1	NM_001037954	A_33_P3399090	11.5199	11.0609	-0.458969	7.06832e-05	0.0107151
LRRC17	NM_005824	A_23_P253958	6.866	6.40428	-0.461726	7.8114e-06	0.00323084
STRN	NM_003162	A_23_P165521	7.12547	6.66338	-0.462092	0.000378697	0.026213
NLGN3	NM_018977	A_23_P62298	7.80396	7.28483	-0.51913	8.1523e-06	0.0032514
SEH1L	NM_001013437	A_33_P3409934	7.38407	6.88406	-0.500017	4.18751e-05	0.00797103
TMEM106B	NM_018374	A_23_P8522	9.96358	9.49952	-0.464064	0.000403324	0.0271875
CPPED1	NM_018340	A_23_P77401	9.11233	8.6904	-0.421929	0.000258935	0.0214194
DFNB59	NM_001042702	A_24_P630490	7.13278	6.66837	-0.464412	0.00032339	0.0243411
NIT2	NM_020202	A_24_P120346	8.92298	8.45832	-0.464661	7.70142e-05	0.0111213
NMRAL1	NM_020677	A_23_P26649	10.4343	9.96883	-0.465452	1.38043e-05	0.00412921
ZNF3	NM_032924	A_23_P219084	8.83812	8.37222	-0.465897	0.000435247	0.0283139
PPIA	NM_021130	A_24_P920125	7.22481	6.62964	-0.595174	4.2576e-06	0.00224054
ZMYM5	NM_001039650	A_24_P321634	7.65848	7.19241	-0.466072	0.000360014	0.0256322
SSSCA1	NM_006396	A_23_P98261	9.15848	8.69197	-0.466515	0.000867066	0.0420924
FGFR2	NM_022970	A_23_P202334	11.9955	11.5283	-0.467247	0.000440093	0.0284085
LOC100129122	XM_001714405	A_32_P231493	7.20079	6.73337	-0.467415	0.000619585	0.0347113
PAOX	NM_207128	A_33_P3336387	7.6331	7.16385	-0.469249	0.000120449	0.0138478
CLN6	NM_017882	A_23_P117797	7.55299	7.13882	-0.414165	0.000401853	0.0271875
C6orf226	NM_001008739	A_33_P3408898	9.8189	9.34849	-0.470412	5.4719e-05	0.00947229
UBE2J1	NM_016021	A_33_P3274332	8.54854	8.07787	-0.47067	0.00113416	0.0488818
PPAPDC2	NM_203453	A_24_P40907	7.7742	7.30118	-0.473013	0.000399471	0.0271875
DOLK	NM_014908	A_23_P10870	7.68836	7.21504	-0.473313	0.000964328	0.0442764
PSPC1	ENST00000338910	A_33_P3232173	6.90748	6.43401	-0.47347	0.000312827	0.0240647
ABCG2	NM_004827	A_33_P3361067	7.58393	7.11041	-0.473524	8.4992e-05	0.0120143
ZNF345	NM_003419	A_33_P3209831	7.24136	6.76657	-0.474789	0.000126975	0.0143641
FANCM	NM_020937	A_32_P106732	7.65819	7.1795	-0.478692	0.00033956	0.0247303
TTL	NM_153712	A_33_P3427102	12.3955	11.8477	-0.5478	1.23073e-05	0.00403935
CLASP2	NM_015097	A_24_P127748	9.09955	8.62056	-0.478986	0.000856428	0.0417664
ENST00000366784	ENST00000366784	A_24_P119545	7.08594	6.55191	-0.534033	3.26057e-05	0.00678482
ENST00000370139	ENST00000370139	A_33_P3224675	7.55441	7.07501	-0.479395	0.000648421	0.0356121
SURF1	NM_003172	A_33_P3292560	12.0766	11.5968	-0.479861	1.7273e-06	0.00125801
ANKRD16	NM_001009941	A_33_P3267502	8.33081	7.84983	-0.480988	2.95429e-05	0.00651148
PRR22	NM_153359	A_23_P372988	6.59234	6.11074	-0.481604	0.000107887	0.0131434
PNPT1	NM_033109	A_32_P76035	7.24229	6.75998	-0.482316	4.90175e-05	0.00887666
PPP2R3A	NM_002718	A_24_P388433	9.84249	9.3597	-0.482784	0.00069801	0.0370092
EEPD1	NM_030636	A_23_P333498	8.70618	8.23576	-0.470425	0.00036036	0.0256322
COMMD4	NM_017828	A_24_P93371	8.5194	8.03586	-0.483541	0.000240296	0.0203808
ANKRD13A	NM_033121	A_24_P98975	10.2301	9.7439	-0.48622	2.15667e-05	0.00551547
ABHD1	NM_032604	A_23_P17242	7.86911	7.38276	-0.486354	0.000700373	0.0370092
TTLL11	NM_194252	A_23_P333852	8.81891	8.33248	-0.486426	0.000698298	0.0370092
PCBP4	NM_033010	A_23_P166807	13.5262	13.0397	-0.486514	0.000767995	0.0389249
SLC9A8	NM_015266	A_24_P58054	7.97075	7.48362	-0.48713	0.000220106	0.0193543
PSAT1	NM_058179	A_23_P259692	12.4501	11.9629	-0.487196	0.0011686	0.0494324
SP5	NM_001003845	A_23_P135381	6.65241	6.16481	-0.487607	7.01194e-05	0.0107151
PPP2R2B	NM_004576	A_23_P213620	11.7035	11.2158	-0.48766	0.00051111	0.0309083
DPY19L1	NM_015283	A_23_P394448	7.41054	6.98594	-0.424604	0.00065843	0.0358678
MFSD6	NM_017694	A_33_P3272209	11.2757	10.7879	-0.487752	0.00114039	0.0489186
KIF21B	NM_017596	A_23_P126888	8.57589	8.08811	-0.487781	3.32287e-05	0.00678798
THBS2	NM_003247	A_33_P3365735	6.96982	6.48107	-0.488757	0.000141086	0.0149252
FAM131B	NM_001031690	A_33_P3270668	8.96288	8.4741	-0.488777	0.000554194	0.0324024
PDHB	NM_000925	A_33_P3364884	10.79	10.3	-0.489938	4.56444e-05	0.0084485
RNF170	NM_030954	A_23_P146209	8.99574	8.47265	-0.523085	0.000377298	0.0261703
EIF2C4	NM_017629	A_23_P23171	8.0341	7.54362	-0.490476	0.000235725	0.0201461
CKAP2	NM_018204	A_23_P151405	7.58494	7.0942	-0.490735	0.00102481	0.0461467
C1orf190	NM_001013615	A_33_P3400823	8.23235	7.74028	-0.49207	0.000539075	0.0317045
ROGDI	NM_024589	A_23_P100499	9.44321	8.95045	-0.492768	0.000823102	0.0407923
TMC7	NM_024847	A_23_P140928	7.56	7.02975	-0.530254	0.000133222	0.0144751
PGRMC1	NM_006667	A_33_P3332130	12.9249	12.4314	-0.493537	0.000257227	0.0213854
CYTSB	NM_152904	A_23_P38567	9.98192	9.48824	-0.493683	0.000744437	0.0379606
NHLRC3	NM_001012754	A_32_P129950	8.70249	8.23952	-0.462963	0.000264612	0.0216554
STEAP1	NM_012449	A_24_P406334	6.92808	6.43222	-0.495852	0.000187381	0.0177183
ANKMY1	NM_016552	A_33_P3315554	8.62061	8.12461	-0.495998	0.000309105	0.023916
TMEM177	NM_030577	A_23_P5339	8.04377	7.54734	-0.496436	0.00115895	0.0492314
EGLN3	NM_022073	A_33_P3256952	7.74605	7.02321	-0.722842	8.407e-07	0.000756631
IMPAD1	NM_017813	A_23_P136232	8.15002	7.6334	-0.516614	0.000149743	0.0152491
FSCN1	NM_003088	A_33_P3411075	13.3477	12.8506	-0.497078	0.00107052	0.0471233
CNTN1	NM_001843	A_23_P390700	8.13111	7.63375	-0.497364	0.000321905	0.0243109
SLC4A11	NM_032034	A_23_P154688	7.90836	7.41042	-0.497934	1.54625e-05	0.00445404
TTYH1	NM_020659	A_23_P50815	15.0635	14.5647	-0.498835	0.000510139	0.0309054
A_33_P3332999	A_33_P3332999	A_33_P3332999	6.81991	6.32104	-0.498875	3.30752e-05	0.00678798
NAT6	NM_012191	A_23_P212400	7.32478	6.824	-0.500788	3.91564e-05	0.00758275
SLC30A9	NM_006345	A_23_P30050	8.29347	7.78772	-0.50575	0.000715157	0.0374055
NOG	NM_005450	A_33_P3391796	7.07906	6.57266	-0.506402	0.000893577	0.0428306
TRUB2	NM_015679	A_23_P169428	9.77088	9.264	-0.506884	4.2099e-06	0.00224054
CCND1	NM_053056	A_23_P202837	8.14775	7.64074	-0.507011	0.000835976	0.0411261
SHFM1	NM_006304	A_23_P42664	12.3201	11.8124	-0.507653	1.5715e-06	0.00122404
VPS4B	NM_004869	A_24_P322369	10.1172	9.60868	-0.508515	0.000314179	0.0240647
SLC25A46	NM_138773	A_33_P3347392	7.867	7.3567	-0.510304	5.82741e-05	0.00966485
PEX3	NM_003630	A_23_P259328	8.1796	7.669	-0.510604	9.32337e-05	0.0123949
RAD23B	NM_002874	A_24_P398092	7.68872	7.17752	-0.511193	0.000911535	0.0432553
PMF1	NM_007221	A_23_P635	9.27693	8.76316	-0.513771	0.000153213	0.0153339
SLC39A7	NM_006979	A_23_P70571	8.86913	8.35085	-0.518274	0.000202605	0.0183451
MED14	NM_004229	A_33_P3223749	8.54005	8.02098	-0.519063	0.00011412	0.013368
KLHL5	NM_015990	A_24_P17719	8.14888	7.62843	-0.520454	3.22403e-05	0.00678482
A_33_P3338539	A_33_P3338539	A_33_P3338539	7.7235	7.20176	-0.52174	0.000641049	0.0354396
FAM69C	NM_001044369	A_32_P203404	7.10576	6.40057	-0.705193	1.9724e-06	0.00140597
GSTZ1	NM_145870	A_23_P106204	8.61814	7.9982	-0.619942	0.00014655	0.0152475
TATDN3	NM_001146171	A_33_P3249773	9.24601	8.72279	-0.523222	2.5477e-06	0.00165126
DHFRL1	NM_176815	A_33_P3317576	8.29051	7.76318	-0.527337	0.000141224	0.0149252
RBP1	NM_002899	A_23_P257649	9.28386	8.75645	-0.527405	0.000698712	0.0370092
DBI	NM_020548	A_33_P3244931	14.6079	14.1176	-0.490323	0.0002743	0.0221971
CR613654	CR613654	A_32_P840463	7.97854	7.35516	-0.623388	1.0481e-06	0.000900359
THNSL1	NM_024838	A_33_P3331601	7.18018	6.64948	-0.530708	0.000724014	0.037432
LOC729887	XR_040889	A_32_P101699	8.57576	8.045	-0.530763	8.55219e-05	0.0120385
FUS	NM_004960	A_23_P106887	9.62872	9.09572	-0.532995	0.000603202	0.0341937
C1orf97	NR_026761	A_23_P1014	7.9505	7.41715	-0.533346	0.00109491	0.0476834
RPAIN	NM_001160266	A_24_P36097	8.77255	8.02997	-0.742582	1.2964e-06	0.00108579
RANBP2	NM_006267	A_33_P3272390	8.23656	7.70242	-0.534136	0.000283247	0.0226476
SEPT7	NM_001788	A_33_P3287028	12.4465	11.9101	-0.536391	2.93942e-05	0.00651148
RNF13	NM_007282	A_32_P131367	9.99393	9.45618	-0.537745	0.00105378	0.0466703
MDP1	NM_138476	A_23_P99811	10.107	9.56864	-0.538345	1.5986e-05	0.00446303
ZNF784	NM_203374	A_33_P3230399	9.24473	8.7042	-0.540533	1.23447e-05	0.00403935
RNMT	NM_003799	A_23_P55515	8.88181	8.33961	-0.542199	1.24602e-05	0.00403935
LOC440957	NM_001124767	A_23_P370924	9.19352	8.65103	-0.542494	2.40987e-05	0.00580831
ENST00000288676	ENST00000288676	A_23_P325924	8.36419	7.82155	-0.542643	0.000201669	0.0183098
SEPT7	NM_001011553	A_24_P291973	13.2416	12.6935	-0.548076	3.16447e-05	0.00675536
PSMG1	NM_003720	A_23_P68717	9.64439	9.09517	-0.549223	5.6185e-05	0.00951353
PADI2	NM_007365	A_24_P187970	8.75715	8.20693	-0.550222	0.000796806	0.0399619
RTF1	NM_015138	A_24_P390403	8.40812	7.85638	-0.551739	8.123e-05	0.0115803
PHF14	NM_014660	A_23_P134384	7.90168	7.34862	-0.553053	2.87627e-05	0.00646716
DLG2	NM_001142700	A_33_P3419026	8.26412	7.70922	-0.554898	0.000233221	0.0200523
ITCH	NM_031483	A_24_P139191	8.49615	7.94002	-0.556126	3.15122e-05	0.00675536
MYADM	NM_001020818	A_23_P27584	10.5754	10.0181	-0.557236	3.66e-08	0.000284114
KCNJ10	NM_002241	A_24_P387875	11.5863	10.9628	-0.623417	0.000119125	0.0137815
CA5B	NM_007220	A_24_P941268	8.18029	7.62101	-0.559281	0.000656848	0.03584
hCG_2022304	NR_027447	A_24_P333567	7.53927	6.97777	-0.561497	6.87662e-05	0.0107151
OPLAH	NM_017570	A_23_P170186	9.56663	9.00352	-0.563114	0.000774708	0.0391467
AGL	NM_000028	A_23_P200298	8.89865	8.33544	-0.563209	0.000246481	0.0207289
PLS3	NM_005032	A_23_P250607	10.5818	10.0185	-0.563306	1.53767e-05	0.00445404
COX11	NM_004375	A_23_P152666	10.8125	10.2468	-0.565709	9.9291e-06	0.00365543
IGDCC3	NM_004884	A_33_P3234020	8.65893	8.08983	-0.569102	0.000337519	0.024689
LYPLAL1	NM_138794	A_33_P3352103	10.3651	9.79314	-0.571914	0.000954348	0.0441756
C8orf82	NM_001001795	A_33_P3387050	11.5525	10.9787	-0.573805	6.6153e-06	0.00295039
SGSH	NM_000199	A_23_P254254	8.74005	8.23068	-0.509366	0.000371486	0.0259954
PER3	NM_016831	A_24_P230948	7.55611	6.98205	-0.574063	7.13e-07	0.00070633
ENST00000403099	ENST00000403099	A_33_P3305536	7.08047	6.50496	-0.575516	5.01457e-05	0.00900049
DHFRL1	NM_176815	A_24_P186065	8.14244	7.56689	-0.575553	0.000446681	0.0286132
ZNF226	NM_001032374	A_23_P218434	10.0875	9.51031	-0.577169	0.000328428	0.0244211
CENPN	NM_018455	A_23_P88740	8.21525	7.63509	-0.580167	0.000791201	0.0397404
MTCH2	NM_014342	A_24_P934563	8.87036	8.28993	-0.580431	6.9e-07	0.00070633
TARBP1	NM_005646	A_23_P52058	8.35588	7.77512	-0.580763	7.16685e-05	0.010727
PTN	NM_002825	A_24_P870620	12.251	11.6691	-0.581859	0.000107532	0.0131434
SEPT7	NM_001011553	A_23_P8482	12.5902	12.008	-0.582215	1.25887e-05	0.00403935
CYB561D2	NM_007022	A_23_P121326	9.22878	8.64056	-0.588215	0.00028667	0.0227045
PLEKHG3	NM_015549	A_33_P3304212	13.2824	12.6891	-0.593266	0.000136407	0.0145942
C1orf97	NR_026761	A_33_P3223097	8.6413	8.04719	-0.59411	0.000723355	0.037432
CXADR	NM_001338	A_24_P374943	7.88221	7.21208	-0.670127	9.8433e-06	0.00365543
SYTL2	NM_206927	A_23_P53193	9.04272	8.44693	-0.595795	6.08644e-05	0.00999549
CRYL1	NM_015974	A_23_P162746	11.6559	11.0556	-0.60036	0.000210322	0.0188052
RNF213	NM_020954	A_33_P3219591	8.0175	7.41384	-0.603655	0.000253783	0.0212556
ASTN1	NM_207108	A_33_P3220738	8.00463	7.40096	-0.603664	4.2144e-06	0.00224054
IFIT3	NM_001549	A_33_P3283611	8.38368	7.77687	-0.606813	0.000809201	0.0403223
AQP6	NM_001652	A_23_P502060	6.92896	6.31786	-0.6111	2.871e-07	0.000534307
ENST00000398301	ENST00000398301	A_33_P3419032	7.61917	7.00681	-0.612361	0.00020734	0.0187232
PCDH10	NM_032961	A_23_P158851	8.50229	7.88815	-0.61415	0.000126054	0.0143155
ENST00000372591	ENST00000372591	A_33_P3408757	8.99323	8.37816	-0.615075	0.000128459	0.0143641
NAT8L	NM_178557	A_33_P3670415	9.46963	8.8513	-0.618335	0.000119296	0.0137815
NUDT18	NM_024815	A_23_P123454	7.29663	6.67593	-0.620704	3.9436e-05	0.00759301
PLEKHG3	NM_015549	A_23_P76901	13.6028	12.9804	-0.622357	0.000149969	0.0152491
PPFIA2	NM_003625	A_23_P402936	8.57103	7.89349	-0.677543	2.24704e-05	0.00557632
LOC284570	BC040156	A_33_P3469658	10.4449	9.81864	-0.626289	0.000917666	0.043362
HNRPDL	NM_031372	A_23_P213153	10.7795	10.1482	-0.631279	3.997e-07	0.000607376
CSRP1	NM_004078	A_23_P74359	12.8689	12.2307	-0.638217	5.51828e-05	0.00947229
PPP1R2	NM_006241	A_24_P174367	8.72878	8.09053	-0.638249	4.39664e-05	0.00818313
GJB1	NM_000166	A_24_P404840	9.81235	9.17311	-0.639238	0.00089484	0.0428306
C2orf72	NM_001144994	A_33_P3227676	9.53661	8.89317	-0.643437	2.80576e-05	0.00639446
LOC100129196	AK057725	A_24_P401830	7.56591	6.91913	-0.646787	0.000211931	0.0188052
HS3ST5	NM_153612	A_24_P226508	7.70239	7.05292	-0.649471	6.5947e-05	0.0103726
TMEM121	NM_025268	A_33_P3411632	10.273	9.61225	-0.660785	1.747e-07	0.000404462
ENST00000340074	ENST00000340074	A_33_P3258013	8.85601	8.19203	-0.663977	3.46906e-05	0.00691788
CCT6B	NM_006584	A_23_P4082	6.83681	6.16836	-0.668451	0.000721423	0.037432
CD46	NM_172350	A_23_P35230	9.09959	8.33003	-0.769562	2.2626e-06	0.00154695
LOC645323	NR_024384	A_32_P127350	9.78066	9.10331	-0.677358	0.000701057	0.0370092
ZNF837	NM_001129730	A_33_P3411427	7.89922	7.22097	-0.678247	1.717e-07	0.000404462
ID2	NM_002166	A_23_P143143	11.4273	10.7477	-0.679576	0.000420017	0.0278642
CAMK2N1	NM_018584	A_23_P11800	13.5152	12.8354	-0.679849	1.13102e-05	0.00394704
C12orf32	NR_027363	A_33_P3263193	8.80265	8.12217	-0.680485	6.7763e-06	0.00295039
FAM84B	NM_174911	A_24_P329487	7.66105	6.98054	-0.68051	6.3775e-05	0.0102721
PAOX	NM_152911	A_23_P385771	9.94691	9.2602	-0.686714	2.103e-07	0.000440337
ST7OT1	NR_002330	A_32_P181297	7.84253	7.15387	-0.688652	0.000346544	0.0251297
HS3ST5	NM_153612	A_23_P351295	7.49825	6.80756	-0.690693	0.000222602	0.0194716
ATP5S	NM_001003803	A_24_P118231	8.96616	8.32351	-0.642647	0.000235518	0.0201461
CDH1	NM_004360	A_23_P206359	6.83057	6.12501	-0.705558	8.4375e-06	0.00327221
ADSSL1	NM_199165	A_23_P76823	9.4646	8.75821	-0.706383	6.99961e-05	0.0107151
ACCN2	NM_020039	A_23_P204751	9.83304	9.1257	-0.707335	4.4597e-06	0.00224054
LOC728769	XR_078316	A_33_P3781394	9.43436	8.72421	-0.710155	2.9443e-06	0.0017614
SERHL2	NM_014509	A_23_P120953	9.86763	9.15631	-0.711318	3.85835e-05	0.00751526
DPYSL5	NM_020134	A_33_P3222183	9.95105	9.23914	-0.711911	0.000384266	0.0265437
NAGLU	NM_000263	A_23_P26945	9.82882	9.12104	-0.707778	3.0173e-06	0.00177343
AGA	NM_000027	A_23_P7099	8.60872	7.88583	-0.722891	9.2034e-05	0.0122842
MAP6D1	NM_024871	A_23_P80839	14.0136	13.2867	-0.7269	0.000197482	0.018226
ENST00000409415	ENST00000409415	A_33_P3339376	7.99928	7.26576	-0.733517	0.000209871	0.0188052
CUEDC1	NM_017949	A_24_P287974	8.92544	8.19086	-0.734578	1.55049e-05	0.00445404
LOC100128822	NR_027387	A_32_P6172	9.14304	8.40627	-0.736765	7.168e-07	0.00070633
SLC4A8	NM_001039960	A_33_P3419998	8.25055	7.50738	-0.743177	1.5869e-06	0.00122404
SLC25A13	NM_014251	A_23_P82334	9.49119	8.74335	-0.747843	0.000115987	0.0135394
CTSO	NM_001334	A_33_P3418025	9.9341	9.18616	-0.74794	0.000928341	0.0436816
TTC32	NM_001008237	A_23_P119857	9.69162	8.93734	-0.754281	0.000163747	0.0159473
MYL5	NM_002477	A_23_P258018	8.47164	7.71691	-0.754721	0.000157758	0.0155447
VSTM2B	NM_001146339	A_33_P3218316	9.66608	8.90715	-0.75893	0.000312537	0.0240647
KCNE1L	NM_012282	A_23_P256641	8.31274	7.17623	-1.13651	4.17e-07	0.000607376
OMG	NM_002544	A_23_P55286	11.2	10.4164	-0.783568	0.000480638	0.0298744
RERGL	NM_024730	A_23_P64919	7.25894	6.4727	-0.786235	0.000422302	0.0279155
FOXS1	NM_004118	A_33_P3283833	8.19261	7.39385	-0.798763	6.4873e-06	0.002937
CADM2	NM_153184	A_33_P3353210	9.86486	9.04915	-0.815716	1.09915e-05	0.00394704
SLC48A1	NM_017842	A_24_P309594	12.9228	12.1032	-0.819613	4.08651e-05	0.00782321
SNX22	NM_024798	A_33_P3212172	11.7947	10.974	-0.820648	0.000577089	0.0329911
ID2	NM_002166	A_32_P69368	10.0484	9.22453	-0.823841	0.00055734	0.0325296
TYMS	NM_001071	A_23_P50096	10.2011	9.37118	-0.829927	0.00102468	0.0461467
APLN	NM_017413	A_23_P113393	9.31657	8.48461	-0.831956	0.00101742	0.0460616
GGTA1	NR_003191	A_23_P112452	8.68873	7.84216	-0.846564	0.000151277	0.0152653
GALNT6	NM_007210	A_33_P3215768	9.43329	8.57815	-0.855144	0.000106041	0.0130846
LOC400099	XR_040794	A_32_P192594	9.53905	8.68117	-0.857875	2.22504e-05	0.00557632
RAB7B	NM_177403	A_23_P252541	7.95664	7.09167	-0.864973	0.000424124	0.0279155
LOC439949	XM_001128367	A_32_P232559	10.62	9.75101	-0.86897	2.34356e-05	0.00570542
ADAMTS8	NM_007037	A_33_P3308347	8.37644	7.50133	-0.875116	0.000127996	0.0143641
RSAD2	NM_080657	A_24_P28722	8.01627	7.11198	-0.904287	0.000198694	0.0182875
CADM2	NM_153184	A_33_P3745164	9.41507	8.50861	-0.906465	1.17041e-05	0.00396203
THBS2	NM_003247	A_33_P3227375	10.9713	10.042	-0.929334	6.8692e-06	0.00295039
C17orf108	NM_001076680	A_23_P392126	10.792	9.86091	-0.93109	6.96e-08	0.000284114
CA14	NM_012113	A_23_P63379	12.0786	11.1194	-0.95915	0.00017829	0.0170659
KCNH8	NM_144633	A_23_P170636	10.237	9.25134	-0.985651	0.000409609	0.0274455
MPEG1	NM_001039396	A_24_P153568	7.44434	6.45468	-0.989656	0.000503156	0.0307044
C18orf56	NM_001012716	A_24_P238499	9.64582	8.65259	-0.993227	0.000132809	0.0144751
MCAM	NM_006500	A_23_P162171	10.4942	9.47874	-1.01543	5.994e-07	0.000669414
CYB5R2	NM_016229	A_23_P2181	12.2525	11.0444	-1.20805	2.31e-08	0.000258215
CIRBP	NM_001280	A_23_P142322	11.1422	10.1203	-1.02182	2.08619e-05	0.00541795
NKAIN1	NM_024522	A_23_P51376	9.84819	8.79273	-1.05546	2.7675e-06	0.00174024
PFKFB2	NM_006212	A_33_P3300635	10.8862	9.64616	-1.24007	5.989e-07	0.000669414
CYB5R2	NM_016229	A_33_P3381265	9.46054	8.27637	-1.18418	6.07e-08	0.000284114
SREBF1	NM_001005291	A_23_P129786	12.9568	11.7548	-1.20204	5.986e-07	0.000669414
GLDN	NM_181789	A_24_P49199	11.1954	10.1783	-1.01711	0.000308436	0.023916
LARP6	NM_197958	A_33_P3237977	10.7294	9.48408	-1.24536	6.84e-08	0.000284114
OPALIN	NM_001040103	A_24_P132813	11.3414	10.0711	-1.27031	0.000190213	0.0177508
P2RY12	NM_022788	A_23_P143902	9.15322	7.87286	-1.28036	9.11137e-05	0.0122842
NPY	NM_000905	A_23_P256470	9.9567	8.02178	-1.93492	0.000156389	0.0154772

## Sheet: Mild vs Severe Disease
Gene	Systematic name	Probe	Average Severe	Average Mild	logFC	p value	p value (adjusted)
S100A8	NM_002964	A_23_P434809	8.91087	10.9535	2.04262	0.000507416	0.049417
SLCO4A1	NM_016354	A_23_P5903	7.80011	9.48692	1.68681	3.83657e-05	0.0158682
GUCA2B	NM_007102	A_23_P63032	11.7897	13.1885	1.39877	1.4812e-06	0.00381706
S100A9	NM_002965	A_23_P23048	7.43065	8.81722	1.38657	0.000305838	0.0398684
NCRNA00168	AF086274	A_32_P29954	7.71952	9.09874	1.37922	2.7593e-05	0.0143896
KCNK12	NM_022055	A_33_P3256510	10.3855	11.7292	1.34376	3.3099e-06	0.00563348
IL1RL1	NM_016232	A_23_P51126	6.42464	7.70644	1.2818	0.000316857	0.0402526
EDN1	NM_001955	A_23_P214821	8.26091	9.53288	1.27198	0.000221904	0.0344955
GPR4	NM_005282	A_23_P357284	7.07091	8.16362	1.09272	0.000119619	0.0286046
BCL3	NM_005178	A_23_P4662	8.63391	9.67844	1.04453	0.00023285	0.0351393
LOC100290344	ENST00000381796	A_33_P3347040	9.86836	10.9127	1.04436	0.000169403	0.0328763
TNFRSF6B	NM_032945	A_23_P218646	7.30025	8.33272	1.03247	0.000346247	0.0410737
MT1X	NM_005952	A_33_P3236868	9.99209	11.0235	1.03139	0.000116655	0.02832
MIA	NM_006533	A_23_P4714	6.98765	8.00459	1.01695	0.000157713	0.0320224
FAM71E1	NM_138411	A_24_P246351	13.2992	14.3118	1.01258	5.125e-07	0.0022698
BC061915	BC061915	A_24_P182122	12.9306	13.9186	0.98807	1.07972e-05	0.00977644
ENST00000320778	ENST00000320778	A_24_P303874	11.0257	12.0011	0.975366	0.000513409	0.0494179
PSMD6	NM_014814	A_23_P109928	11.2648	12.2289	0.964047	0.00040498	0.0440768
EFCAB3	NM_001144933	A_33_P3264042	7.0603	8.01411	0.953804	9.36485e-05	0.0264875
CSDA	NM_003651	A_24_P625382	8.09173	9.04144	0.949706	0.000512029	0.0494179
FABP6	NM_001040442	A_23_P43846	7.66457	8.60903	0.944462	3.0149e-06	0.00563348
IL4R	NM_000418	A_23_P129556	10.001	10.9276	0.926604	0.000145532	0.0308454
PRKX	NM_005044	A_23_P217339	8.50174	9.41836	0.916615	0.000186161	0.0335001
LOC100008588	NR_003286	A_33_P3390107	11.2433	12.1587	0.915385	0.000322171	0.0406983
IL32	NM_001012631	A_23_P15146	7.37042	8.27154	0.901124	2.44647e-05	0.0136603
GJA4	NM_002060	A_23_P1083	7.58158	8.47407	0.892498	1.00811e-05	0.00977644
PRKXP1	AK095793	A_33_P3618429	9.09129	9.97166	0.880368	0.000178601	0.0328763
LOC727804	XM_001125843	A_33_P3346046	12.1991	13.0755	0.876469	2.09142e-05	0.0130142
ERC2	NM_015576	A_24_P374759	10.1149	10.9889	0.873936	0.000530407	0.0496317
ABCC8	NM_000352	A_23_P24774	8.451	9.30987	0.858871	0.000134056	0.029941
GDF10	NM_004962	A_23_P52227	7.31327	8.13697	0.823693	0.000251013	0.0373752
TGFB3	NM_003239	A_23_P88404	9.28729	10.1103	0.822991	3.1605e-06	0.00563348
ENST00000403628	ENST00000403628	A_33_P3346331	9.76477	10.5798	0.815006	4.69838e-05	0.0171179
LRRC32	NM_005512	A_24_P389916	7.86188	8.64517	0.783291	0.000198988	0.0335001
AK026903	AK026903	A_23_P431853	14.7108	15.4781	0.76729	0.000223661	0.0344955
TNFRSF10D	NM_003840	A_33_P3326588	6.83083	7.59565	0.76482	0.000143944	0.0307161
CABP7	NM_182527	A_33_P3348061	7.5104	8.26815	0.757753	0.00031427	0.0402526
HEYL	NM_014571	A_23_P430658	7.49578	8.2534	0.757619	2.58494e-05	0.0141968
ICAM2	NM_000873	A_23_P152655	10.4504	11.2048	0.754383	0.000202428	0.0339087
PDE4DIP	NM_022359	A_33_P3333982	10.6216	11.3755	0.753864	4.22281e-05	0.016842
LOC100131372	XR_078703	A_33_P3330179	6.84238	7.59134	0.748954	4.99337e-05	0.0175134
CACNA1H	NM_021098	A_33_P3218960	6.67413	7.41516	0.741034	1.2986e-05	0.0108764
CCL14	NM_032963	A_23_P218369	6.3515	7.09034	0.738837	4.6717e-05	0.0171179
ACSL5	NM_203380	A_33_P3217983	8.66792	9.40561	0.737693	1.81889e-05	0.0129925
MLKL	NM_152649	A_23_P61050	8.40057	9.13605	0.73548	0.000345555	0.0410737
LOC100288412	XM_002342287	A_33_P3226237	9.15161	9.8727	0.721092	0.000189952	0.0335001
ARG1	NM_000045	A_33_P3319967	6.18389	6.89468	0.710794	0.000376329	0.0431773
IL1R2	NM_004633	A_24_P63019	6.39335	7.10052	0.707169	7.514e-06	0.00839117
MKNK2	NM_199054	A_24_P929754	7.62198	8.31569	0.693702	3.969e-07	0.0022698
PDE8B	NM_003719	A_24_P197537	9.57755	10.2694	0.691842	5.73748e-05	0.0190314
SHISA3	NM_001080505	A_23_P41476	6.49272	7.18362	0.690893	6.35021e-05	0.0202614
PMCH	NM_002674	A_23_P321223	6.02231	6.70835	0.686034	0.000456987	0.0471001
F2	NM_000506	A_23_P94879	6.63757	7.31779	0.68022	0.000131716	0.0298159
TBX2	NM_005994	A_23_P164451	7.84604	8.52474	0.678698	0.000348307	0.0410737
ENST00000357042	ENST00000357042	A_33_P3421418	10.7509	11.4231	0.672276	0.000302926	0.0396431
A_33_P3315899	A_33_P3315899	A_33_P3315899	9.48016	10.1428	0.662619	0.00051775	0.0494179
TGM2	NM_004613	A_32_P86763	7.17276	7.83436	0.6616	4.70074e-05	0.0171179
ADCY4	NM_139247	A_23_P381261	8.20794	8.86889	0.660947	0.000390285	0.0440625
SOX30	NM_007017	A_33_P3260563	6.556	7.20877	0.652769	5.72758e-05	0.0190314
LOC100132288	NM_001033515	A_23_P356646	7.43014	8.0676	0.637455	3.236e-06	0.00563348
SLC22A7	NM_153320	A_23_P93217	7.09865	7.73148	0.632826	0.000270101	0.0382809
IGF2BP1	NM_006546	A_23_P83498	6.55078	7.17832	0.627538	2.13797e-05	0.0130142
SEMA6B	NM_032108	A_23_P208900	7.39972	8.02522	0.6255	0.000215638	0.0343574
INHBA	NM_002192	A_23_P122924	7.31861	7.93896	0.62035	0.000400801	0.0440768
PMCHL1	NR_003921	A_23_P170378	6.07873	6.69775	0.619021	0.000189782	0.0335001
A_33_P3227703	A_33_P3227703	A_33_P3227703	6.97194	7.58811	0.616172	0.000316715	0.0402526
TNFRSF6B	NM_032945	A_33_P3305571	6.70237	7.31673	0.614363	1.90517e-05	0.0130142
FOXO4	NM_005938	A_24_P379165	8.57362	9.18236	0.60874	8.63383e-05	0.0253729
A_33_P3354061	A_33_P3354061	A_33_P3354061	7.04082	7.64909	0.608272	4.4452e-06	0.00602777
ABCC6	NM_001079528	A_33_P3298043	6.75726	7.36543	0.608175	7.39586e-05	0.0223222
ABCD3	NM_001122674	A_33_P3307955	8.02816	8.63235	0.604191	0.00034186	0.0410737
FLJ40125	NM_001080401	A_33_P3279681	6.79681	7.38936	0.592553	1.1177e-06	0.0031203
OXTR	NM_000916	A_33_P3413741	6.60451	7.18566	0.581146	0.000487967	0.0489457
ENST00000367860	ENST00000367860	A_33_P3286873	6.28137	6.86212	0.580749	0.00052215	0.0495554
LRG1	NM_052972	A_23_P50638	7.05509	7.63076	0.575665	1.20663e-05	0.0103652
LOC646762	NR_024278	A_33_P3395146	10.2482	10.8201	0.571842	2.202e-05	0.0130142
CTU1	NM_145232	A_33_P3395971	8.00364	8.57104	0.567399	0.000131429	0.0298159
PAX6	ENST00000379123	A_33_P3234303	6.27835	6.84099	0.562636	0.000323137	0.0406983
BAIAP2L2	NM_025045	A_23_P379034	8.68635	9.24819	0.561841	0.000267362	0.0381156
A_33_P3346533	A_33_P3346533	A_33_P3346533	7.2087	7.7671	0.558404	1.45297e-05	0.0110755
DPF2	NM_006268	A_23_P127446	10.6894	11.2465	0.557038	0.000399634	0.0440768
AKT3	NM_181690	A_23_P160354	10.1176	10.6703	0.552678	0.000139256	0.0299631
A_24_P178654	A_24_P178654	A_24_P178654	10.2213	10.772	0.550748	0.000121242	0.0286046
AK124741	AK124741	A_24_P392713	11.8721	12.4211	0.548972	3.52982e-05	0.0157072
CLEC2B	NM_005127	A_33_P3332970	6.8836	7.43243	0.54883	0.000131311	0.0298159
SEMA3F	NM_004186	A_33_P3813128	6.51002	7.05861	0.548585	0.000463269	0.0473184
ENST00000317197	ENST00000317197	A_33_P3375950	13.6208	14.1688	0.547911	8.04291e-05	0.0240584
KAAG1	NM_181337	A_24_P143301	6.49781	7.04408	0.546275	0.000317196	0.0402526
PDZD2	NM_178140	A_23_P7402	8.98733	9.53326	0.545928	0.000231773	0.0351351
ENST00000406213	ENST00000406213	A_33_P3351894	8.62453	9.16896	0.544431	0.000343563	0.0410737
SNAR-G1	BU536871	A_33_P3542886	6.33652	6.8806	0.54408	0.000405761	0.0440768
BE300169	BE300169	A_32_P194962	9.02363	9.56257	0.538947	2.21913e-05	0.0130142
ANXA3	NM_005139	A_23_P121716	7.05417	7.59066	0.536494	0.000282062	0.0384478
AQP3	NM_004925	A_23_P112482	6.888	7.42399	0.535992	0.000292352	0.0387129
ENST00000433145	ENST00000433145	A_32_P64038	10.378	10.9103	0.532322	6.19904e-05	0.0201621
TOB2	NM_016272	A_32_P179676	9.75545	10.2866	0.531101	0.00033545	0.0410737
TMEM54	NM_033504	A_33_P3230219	10.583	11.1128	0.529856	0.00033977	0.0410737
LOC100128252	XM_001725553	A_33_P3259973	9.51664	10.0427	0.526098	0.000453818	0.0470706
AOC2	NM_001158	A_23_P4133	6.23521	6.75544	0.520228	6.345e-07	0.0022698
A_24_P366457	A_24_P366457	A_24_P366457	10.1622	10.6823	0.520028	0.000494416	0.0489998
RASGRP2	NM_153819	A_33_P3209960	7.83302	8.34547	0.512453	3.20351e-05	0.0157072
ADH4	NM_000670	A_23_P30098	6.39735	6.90897	0.511615	0.000254448	0.0374981
TMEM173	NM_198282	A_23_P61371	8.34051	8.85095	0.510441	0.000214945	0.0343574
RPS29	NM_001030001	A_33_P3282840	9.20247	9.71165	0.509179	0.00011325	0.0278016
LOC100288678	XM_002342998	A_33_P3251557	6.41499	6.92108	0.506091	6.424e-07	0.0022698
FOXA3	NM_004497	A_23_P142174	6.64576	7.15174	0.505988	4.38964e-05	0.0169968
WDR5	NM_017588	A_33_P3292417	10.1335	10.6371	0.503609	0.000177809	0.0328763
TLN2	NM_015059	A_33_P3264815	9.38513	9.88564	0.500517	1.95849e-05	0.0130142
NR1I3	NM_001077474	A_33_P3414594	6.04818	6.5435	0.495315	0.000112014	0.0277978
F10	NM_000504	A_23_P205177	7.02373	7.51299	0.489253	0.000213453	0.0343574
MAT2A	NM_005911	A_33_P3403044	9.24149	9.72921	0.487721	1.07591e-05	0.00977644
KRT18	NM_000224	A_24_P42136	6.54085	7.02834	0.487491	0.000496502	0.0489998
NUDT16	NM_152395	A_23_P310560	9.93875	10.4219	0.483175	1.4546e-05	0.0110755
BEND6	NM_152731	A_33_P3329769	8.80313	9.28616	0.483028	0.000230322	0.0350738
HNRNPA2B1	BX641084	A_33_P3337318	6.60497	7.08461	0.47964	9.25517e-05	0.0264875
ADAM11	NM_002390	A_33_P3386775	6.79534	7.27445	0.4791	4.42508e-05	0.0169968
IGSF3	NM_001542	A_33_P3240757	6.53968	7.01704	0.477362	3.30265e-05	0.0157072
CLIC5	NM_016929	A_23_P416774	7.36397	7.84115	0.477177	0.000535	0.0496317
NKX6-3	NM_152568	A_33_P3421275	6.4418	6.91653	0.474729	7.35808e-05	0.0223222
A_33_P3334342	A_33_P3334342	A_33_P3334342	8.16374	8.63552	0.471781	4.2026e-05	0.016842
BGLAP	NM_199173	A_24_P336551	8.62421	9.09519	0.470986	0.000391238	0.0440625
TCF19	NM_007109	A_24_P349965	6.68455	7.15222	0.467661	0.000516247	0.0494179
RPS18	NM_022551	A_33_P3385488	13.1262	13.5933	0.467094	9.43565e-05	0.0264875
TCP10L	NM_144659	A_23_P350555	7.99459	8.46125	0.466658	0.000334009	0.0410737
GATSL3	NM_001037666	A_33_P3226050	9.07848	9.54156	0.463086	0.000375406	0.0431773
BRUNOL6	NM_052840	A_33_P3304312	10.4887	10.9511	0.462394	0.00019706	0.0335001
A_24_P928604	A_24_P928604	A_24_P928604	11.588	12.0483	0.460282	0.000109268	0.027524
A_33_P3357669	A_33_P3357669	A_33_P3357669	10.6504	11.1097	0.45936	0.000274599	0.0383318
C11orf84	NM_138471	A_23_P313223	6.97409	7.4283	0.454214	9.7247e-05	0.0264875
MEF2B	NM_001145785	A_33_P3344406	8.17788	8.63081	0.452931	0.000193303	0.0335001
APTX	NM_175073	A_23_P252775	8.7699	9.21618	0.446278	6.775e-07	0.0022698
YTHDF1	NM_017798	A_33_P3407105	7.36467	7.8105	0.445828	0.000537768	0.0496317
STARD8	NM_014725	A_23_P387630	7.61966	8.0555	0.435846	0.000348742	0.0410737
DMPK	NM_004409	A_23_P50535	9.78834	10.2234	0.435024	0.000311137	0.0402526
ENST00000394982	ENST00000394982	A_33_P3362587	6.20545	6.63399	0.42854	0.000361563	0.0423534
LOC158376	NR_024283	A_33_P3424132	6.70859	7.13284	0.424246	0.000458971	0.0471001
HDAC5	NM_001015053	A_24_P125283	11.6371	12.0603	0.42321	0.000197124	0.0335001
ETHE1	NM_014297	A_23_P142294	7.90447	8.32149	0.41702	3.3631e-06	0.00563348
A_33_P3230676	A_33_P3230676	A_33_P3230676	6.23873	6.65282	0.414091	0.000223023	0.0344955
A_33_P3326312	A_33_P3326312	A_33_P3326312	9.58081	9.99165	0.41084	0.000531015	0.0496317
JPH4	BC109228	A_33_P3325665	6.16608	6.57681	0.410731	5.59958e-05	0.0190314
A_24_P256037	A_24_P256037	A_24_P256037	11.9397	12.3482	0.408585	0.000105321	0.027142
MRPL52	NM_181304	A_24_P57730	8.36484	8.77057	0.405722	0.000214957	0.0343574
RASGRP2	NM_153819	A_33_P3209962	7.28018	7.68428	0.404103	0.000101383	0.0267443
ENST00000427462	ENST00000427462	A_33_P3397073	7.95263	8.3565	0.403863	0.000197183	0.0335001
LOC284263	BC038429	A_33_P3663105	6.34807	6.74741	0.399338	2.24108e-05	0.0130142
RP3-377H14.5	NR_026972	A_32_P76811	12.1293	12.5239	0.39455	1.44169e-05	0.0110755
REEP6	NM_138393	A_33_P3262789	8.80899	9.20084	0.391853	0.000532281	0.0496317
ENST00000359659	ENST00000359659	A_24_P375849	11.6014	11.9922	0.390734	0.000459269	0.0471001
RPL23AP71	CR595167	A_24_P333106	12.4219	12.8102	0.38828	0.000184987	0.0335001
LOC100130262	XM_001714091	A_33_P3219286	6.83106	7.21746	0.38641	0.000224465	0.0344955
RPL18A	NM_000980	A_32_P193288	12.9469	13.3313	0.384364	0.000234831	0.0352794
RPL35	NM_007209	A_32_P72940	12.5708	12.939	0.368213	2.68495e-05	0.0142946
LOC100289383	XM_002344123	A_24_P636974	6.61857	6.98661	0.368039	9.885e-06	0.00977644
PEG3	NM_006210	A_33_P3424057	6.09871	6.46094	0.362233	0.000406535	0.0440768
RPS23	NM_001025	A_32_P84605	14.3806	14.7407	0.360111	0.00034878	0.0410737
A_33_P3325011	A_33_P3325011	A_33_P3325011	13.3762	13.7358	0.359616	7.27337e-05	0.0223222
C4orf3	NM_001001701	A_23_P388433	12.1104	12.467	0.356621	0.000172717	0.0328763
RPL37A	NM_000998	A_23_P142724	15.8022	16.1587	0.356515	4.0953e-06	0.00602777
A_24_P401100	A_24_P401100	A_24_P401100	13.4254	13.7794	0.353957	0.000130241	0.0298159
ENST00000374139	ENST00000374139	A_33_P3345344	6.34331	6.69711	0.353794	0.000264024	0.0379628
A_33_P3369646	A_33_P3369646	A_33_P3369646	7.7239	8.07722	0.353317	0.000216388	0.0343574
RPL32P3	NR_003111	A_33_P3775741	12.8483	13.2004	0.35205	0.000178111	0.0328763
C1orf151	NM_001032363	A_33_P3277140	12.4867	12.8361	0.349398	7.18464e-05	0.0223222
FAM138D	NR_026823	A_33_P3674029	5.9653	6.30757	0.342268	9.126e-07	0.00277959
KLHDC7A	NM_152375	A_33_P3417765	6.59683	6.93764	0.340809	0.000152087	0.031452
MGC44328	XR_040562	A_33_P3355454	6.33983	6.67578	0.335947	2.25307e-05	0.0130142
ENST00000397190	ENST00000397190	A_33_P3372397	6.45715	6.78637	0.32922	4.4981e-06	0.00602777
A_33_P3266609	A_33_P3266609	A_33_P3266609	6.41237	6.73017	0.317801	7.27581e-05	0.0223222
A_33_P3256565	A_33_P3256565	A_33_P3256565	6.41684	6.73423	0.317386	0.000159747	0.0320469
UCKL1AS	NR_027287	A_33_P3356004	6.48962	6.79835	0.308732	0.000139521	0.0299631
LOC100133817	XM_001718034	A_33_P3307475	6.06827	6.37607	0.3078	5.40498e-05	0.0186678
CDR1	NM_004065	A_23_P125495	6.45806	6.76371	0.305656	0.000401523	0.0440768
NP100974	NP100974	A_33_P3420167	12.5175	12.8189	0.301461	0.000481421	0.04858
ENST00000304813	ENST00000304813	A_33_P3249743	6.25692	6.55007	0.293144	0.000107247	0.0274273
LOC100128747	XM_001719529	A_33_P3332749	7.07573	7.36074	0.285009	0.000215632	0.0343574
STRA13	NM_144998	A_24_P65507	11.482	11.7667	0.284708	0.000219417	0.0344955
ENST00000470599	ENST00000470599	A_33_P3357182	6.16213	6.44382	0.281691	6.9234e-06	0.0079982
LOC643327	XR_041724	A_33_P3304268	6.36264	6.64329	0.28065	0.000180484	0.0330413
LOC100128672	ENST00000425078	A_33_P3296281	6.12455	6.4028	0.278248	3.65697e-05	0.0157072
TSSK6	NM_032037	A_23_P108221	6.41589	6.69099	0.2751	0.000535214	0.0496317
A_33_P3417547	A_33_P3417547	A_33_P3417547	6.38805	6.66063	0.272581	2.33355e-05	0.0132506
FAM25C	BC127791	A_33_P3832680	6.33767	6.60583	0.268157	0.000490124	0.0489925
LOC644578	XM_001715474	A_33_P3340352	5.83874	6.10249	0.263749	4.3472e-06	0.00602777
AK027069	AK027069	A_33_P3325395	6.71657	6.97784	0.261266	0.000385463	0.0438845
RPS17	NM_001021	A_24_P418418	14.6001	14.8556	0.255521	1.97522e-05	0.0130142
SOX15	NM_006942	A_23_P164011	6.19237	6.4432	0.250827	0.00033472	0.0410737
LOC646396	XM_001716204	A_33_P3271038	6.27279	6.52274	0.249945	4.94853e-05	0.0175134
GRIN1	NM_007327	A_23_P257962	6.03955	6.28557	0.246021	0.000256629	0.0375441
RPL24	NM_000986	A_23_P256933	14.4837	14.7286	0.24496	0.000149414	0.0312854
ENST00000313063	ENST00000313063	A_33_P3365368	6.17195	6.41668	0.244725	0.000391935	0.0440625
A_33_P3354214	A_33_P3354214	A_33_P3354214	6.31482	6.55937	0.244553	0.000333179	0.0410737
RPL30	NM_000989	A_23_P123330	14.2182	14.4612	0.242916	9.5736e-05	0.0264875
AK126237	AK126237	A_33_P3388183	6.26036	6.50132	0.240963	0.00010111	0.0267443
RPL22	NM_000983	A_32_P210252	12.704	12.9443	0.240333	0.000252819	0.0374776
RPL37A	NM_000998	A_32_P783	15.4941	15.734	0.239956	0.000431822	0.0460729
CLDN9	NM_020982	A_33_P3352852	6.38062	6.61219	0.231567	0.000136037	0.0299631
MYNN	AK092022	A_33_P3303102	6.15123	6.38141	0.230181	5.01848e-05	0.0175134
CYP46A1	NM_006668	A_23_P48784	6.58696	6.80734	0.220374	0.000444954	0.0467399
CSAG2	NM_004909	A_24_P567298	6.30173	6.51266	0.210928	0.000311281	0.0402526
LOC100128949	XM_001720075	A_33_P3278896	6.25599	6.457	0.201008	0.000159579	0.0320469
WNT7B	NM_058238	A_33_P3248903	6.13445	6.3297	0.195245	0.000371298	0.0431773
LOC100289079	ENST00000400774	A_24_P118884	5.7809	5.97284	0.191941	0.000435764	0.0461993
ACTRT2	NM_080431	A_23_P148829	6.47775	6.66802	0.190269	8.58084e-05	0.0253729
ENST00000438946	ENST00000438946	A_33_P3401247	5.87036	6.04541	0.175051	8.4602e-06	0.00914306
ART5	NM_053017	A_23_P427122	6.35871	6.52323	0.164516	0.000367392	0.0428863
A_33_P3222524	A_33_P3222524	A_33_P3222524	6.39739	6.54584	0.148449	0.000210549	0.0343574
ENST00000257935	ENST00000257935	A_33_P3269503	6.1523	6.28855	0.136253	0.000380179	0.0434701
MAGEB17	ENST00000329538	A_33_P3423504	6.2106	6.34224	0.131639	0.000435632	0.0461993
A_33_P3264533	A_33_P3264533	A_33_P3264533	5.9238	6.05446	0.130659	0.00033106	0.0410737
ZNF81	NM_007137	A_33_P3372293	6.43603	6.22841	-0.207615	0.000210136	0.0343574
CHMP2A	NM_014453	A_23_P153236	12.2644	12.0474	-0.216919	0.000444025	0.0467399
RAG1	NM_000448	A_23_P360744	6.25388	6.02915	-0.224726	0.000491358	0.0489925
ISPD	NM_001101426	A_33_P3381707	6.04263	5.81772	-0.224914	0.000118356	0.0285264
FKTN	NM_001079802	A_23_P216622	6.6258	6.3962	-0.2296	0.000404887	0.0440768
NHEDC1	NM_139173	A_24_P657226	6.30346	6.06445	-0.239009	0.000215817	0.0343574
ZNF850P	CR627133	A_24_P450596	6.25565	6.01177	-0.243879	0.000412312	0.0444156
CDC27	NM_001256	A_23_P66777	8.82269	8.5752	-0.247495	0.000424141	0.0455435
KDM2B	NM_032590	A_33_P3529859	7.06785	6.8202	-0.247652	0.000346332	0.0410737
HGSNAT	NM_152419	A_24_P16378	6.60478	6.34201	-0.262771	0.00017841	0.0328763
IARS2	NM_018060	A_23_P74843	10.3369	10.0719	-0.265062	0.000267126	0.0381156
BTBD1	NM_025238	A_23_P205830	10.8605	10.5951	-0.26538	0.000273536	0.0383318
PSMC1	NM_002802	A_24_P347488	12.097	11.8295	-0.267415	5.6288e-06	0.00698436
ASB1	NM_001040445	A_23_P165360	7.31514	7.04658	-0.268553	2.7304e-06	0.00563348
ENST00000395861	ENST00000395861	A_33_P3282973	7.63234	7.36133	-0.271006	0.000206165	0.0341928
GOLGA8F	NM_001012452	A_24_P264166	6.60641	6.33109	-0.275318	0.000166627	0.0326452
CENPO	ENST00000380834	A_24_P276888	6.79481	6.51393	-0.280881	0.000349236	0.0410737
PGGT1B	NM_005023	A_23_P256632	6.44232	6.15561	-0.286709	0.000198592	0.0335001
LDLRAD3	NM_174902	A_24_P391574	6.43863	6.14966	-0.288965	0.000375263	0.0431773
RNF121	NM_018320	A_23_P75973	7.72354	7.43165	-0.291898	0.00015083	0.0313856
STRN3	NM_014574	A_23_P392076	6.97941	6.68385	-0.295556	0.000459726	0.0471001
ERCC8	NM_000082	A_23_P58521	7.03933	6.7363	-0.303027	0.00013309	0.0299248
CST6	NM_001323	A_23_P146946	6.25698	5.95245	-0.304537	0.000261109	0.0377055
C1orf174	NM_207356	A_24_P298877	10.1616	9.85707	-0.304568	0.000260969	0.0377055
TMEM185B	NR_000034	A_23_P119789	7.06369	6.75805	-0.305638	0.000517382	0.0494179
ZNF33A	NM_006974	A_24_P212129	8.83223	8.52617	-0.306064	0.000376026	0.0431773
PACRGL	NM_145048	A_24_P311604	8.03004	7.72016	-0.309884	0.000127982	0.0298159
CDS2	NM_003818	A_24_P271363	9.28859	8.97541	-0.313177	1.20083e-05	0.0103652
ARPC2	NM_152862	A_23_P102122	12.0405	11.7273	-0.313194	0.000154416	0.0316951
CASP3	NM_004346	A_23_P92410	10.1872	9.87053	-0.316682	6.1737e-06	0.00738678
WDR44	NM_019045	A_33_P3239736	8.25767	7.94054	-0.317131	0.000165662	0.0326452
RBBP9	NM_006606	A_33_P3365047	6.93544	6.61699	-0.318452	7.21638e-05	0.0223222
FAM91A1	NM_144963	A_33_P3225313	7.19576	6.8752	-0.320564	0.000172641	0.0328763
THUMPD3	NM_015453	A_23_P212213	8.53891	8.21687	-0.322038	0.000137993	0.0299631
DENND4A	NM_001144823	A_23_P384329	7.13776	6.81489	-0.322866	0.000289974	0.038675
PSMB1	NM_002793	A_24_P233570	13.8164	13.4917	-0.32469	0.000386422	0.0438845
PRKAA1	NM_206907	A_33_P3312212	7.18356	6.85456	-0.329007	0.000398684	0.0440768
PHKB	NM_001031835	A_23_P206532	10.0492	9.71567	-0.333568	0.00018696	0.0335001
SP3	NM_003111	A_23_P347198	9.7642	9.42957	-0.33463	0.000130363	0.0298159
KDM2B	NM_001005366	A_33_P3529860	7.53891	7.20288	-0.336024	0.000102495	0.0268263
MAPRE1	NM_012325	A_24_P220058	10.7639	10.4273	-0.336586	0.000515408	0.0494179
IFI27L1	NM_206949	A_24_P261929	11.6185	11.2809	-0.337557	0.000535791	0.0496317
LRPPRC	NM_133259	A_24_P26073	9.81254	9.47406	-0.338477	0.000312852	0.0402526
GTF2E1	NM_005513	A_23_P211748	8.67516	8.33298	-0.342181	0.000113689	0.0278016
ZDHHC24	NM_207340	A_24_P259276	8.10556	7.7629	-0.342663	0.000290911	0.038675
FH	NM_000143	A_23_P34733	9.16275	8.81905	-0.3437	0.000536648	0.0496317
SLC30A5	NM_022902	A_23_P218988	8.35363	8.00965	-0.343982	0.000295444	0.0389683
PRIM2	NM_000947	A_23_P44139	7.66691	7.31541	-0.351497	0.000503948	0.0493663
FTSJD2	NM_015050	A_23_P374149	8.41887	8.06316	-0.355714	0.000520655	0.0495539
ENST00000378861	ENST00000378861	A_33_P3370310	6.60941	6.25358	-0.355838	0.000108242	0.0274721
ENST00000382464	ENST00000382464	A_33_P3278868	7.96662	7.61053	-0.356089	0.000298431	0.039208
MFSD8	NM_152778	A_24_P303080	7.91254	7.55601	-0.356527	4.7792e-06	0.00615825
LCORL	NM_001166139	A_33_P3333890	7.44031	7.08182	-0.35849	3.31321e-05	0.0157072
DCTN2	NM_006400	A_23_P360167	11.5172	11.1584	-0.35889	4.2183e-06	0.00602777
SYNRG	NM_007247	A_23_P396626	7.86945	7.50775	-0.361698	4.85746e-05	0.0174983
UQCRC1	NM_003365	A_23_P132675	11.1733	10.8059	-0.367341	0.000289055	0.038675
ZNF33A	NM_006954	A_24_P212127	8.27061	7.9015	-0.369116	0.000506371	0.049417
C7orf25	NM_024054	A_24_P300483	7.49671	7.12578	-0.370935	0.000196798	0.0335001
MBTPS2	NM_015884	A_23_P114095	7.60047	7.2268	-0.373669	0.000197572	0.0335001
UEVLD	NM_001040697	A_23_P203445	8.19186	7.81424	-0.377621	0.000501921	0.0493119
DAZAP2	NM_014764	A_23_P40025	13.9709	13.593	-0.377896	0.000475842	0.0483081
PWP1	NM_007062	A_23_P395524	10.4083	10.0299	-0.378323	9.85116e-05	0.0266156
GM2A	NM_000405	A_24_P925314	9.66396	9.28145	-0.38251	0.000155155	0.0316951
FPGT	NM_003838	A_23_P200030	8.17952	7.79594	-0.383587	0.000446444	0.0467399
RNF160	NM_015565	A_32_P115505	7.96359	7.57947	-0.384127	0.000273785	0.0383318
FBXO4	NM_012176	A_24_P171873	7.35129	6.966	-0.385297	0.000170935	0.0328763
LATS1	NM_004690	A_23_P366230	7.15734	6.77176	-0.385578	0.000333856	0.0410737
ZFAND6	NM_019006	A_32_P220472	10.6749	10.289	-0.385915	4.34122e-05	0.0169968
SELT	NM_016275	A_33_P3290672	11.9576	11.5656	-0.391942	0.000187506	0.0335001
NIN	NM_020921	A_23_P396353	7.99282	7.60054	-0.392276	0.00028973	0.038675
OSBPL1A	NM_080597	A_33_P3308534	8.0172	7.62361	-0.393592	0.000146392	0.0308454
MTX3	NM_001010891	A_33_P3356846	6.95772	6.56265	-0.395069	2.8109e-06	0.00563348
TXNDC9	NM_005783	A_24_P362646	8.27077	7.87386	-0.396914	0.000281675	0.0384478
PHF11	NM_001040443	A_23_P65174	9.10498	8.70768	-0.397296	2.68809e-05	0.0142946
C5orf28	NM_022483	A_23_P121875	7.63456	7.23681	-0.397745	9.50883e-05	0.0264875
FAM127C	NM_001078173	A_33_P3296707	7.81892	7.4211	-0.397817	0.000162854	0.0323964
INSIG2	NM_016133	A_33_P3321342	7.88586	7.4846	-0.401265	0.000218498	0.0344955
LOC401397	NR_024412	A_32_P54305	11.0653	10.6631	-0.402229	0.000135637	0.0299631
A_24_P221485	A_24_P221485	A_24_P221485	6.75636	6.35386	-0.402497	0.00048778	0.0489457
NMD3	NM_015938	A_23_P32861	7.85217	7.4487	-0.403468	0.00053316	0.0496317
ZNF33A	NM_006954	A_33_P3323101	8.4561	8.05132	-0.404789	0.000397354	0.0440768
TMEM14C	NM_016462	A_23_P111288	11.5079	11.103	-0.404862	2.97593e-05	0.0148806
EIF2AK2	NM_001135652	A_33_P3224858	7.74699	7.33914	-0.407851	0.000478333	0.0484142
SEPT2	NM_001008491	A_23_P170839	12.197	11.7872	-0.409791	0.000497281	0.0489998
YWHAQ	NM_006826	A_23_P131723	13.4936	13.0831	-0.410583	0.000290099	0.038675
C6orf120	NM_001029863	A_33_P3368675	7.90424	7.49281	-0.411425	0.000220764	0.0344955
FAM49B	NM_016623	A_23_P43255	10.564	10.1486	-0.415306	0.000258335	0.0376293
PLD5	NM_152666	A_23_P510	6.79646	6.37796	-0.4185	0.000178298	0.0328763
NLGN3	NM_018977	A_23_P62298	7.77958	7.35625	-0.423331	0.000283329	0.0384478
CPSF3	NM_016207	A_23_P28688	8.36585	7.94057	-0.425275	3.56912e-05	0.0157072
SEH1L	NM_001013437	A_33_P3409934	7.37125	6.94432	-0.426924	0.000283464	0.0384478
CPPED1	NM_018340	A_23_P77401	9.1416	8.70917	-0.432422	0.000137993	0.0299631
OSTM1	NM_014028	A_32_P154830	7.4846	7.04769	-0.436904	0.000101044	0.0267443
SLC35D2	NM_007001	A_23_P32029	7.66748	7.22444	-0.443039	0.000453414	0.0470706
PPIA	NM_021130	A_24_P920125	7.17539	6.7287	-0.446688	0.000169814	0.0328763
CD63	NM_001040034	A_24_P270144	13.7866	13.335	-0.451614	0.000246948	0.0369342
SFRS3	NM_003017	A_23_P413761	11.7626	11.306	-0.45659	9.65372e-05	0.0264875
DPYSL5	NM_020134	A_23_P401691	7.23864	6.7806	-0.458047	0.00051676	0.0494179
CLN6	NM_017882	A_23_P117797	7.60065	7.14212	-0.458532	1.82272e-05	0.0129925
ADAM10	NM_001110	A_23_P48886	7.7271	7.26466	-0.462443	3.53429e-05	0.0157072
STT3B	NM_178862	A_23_P434473	8.06532	7.60274	-0.46258	1.638e-07	0.00189193
ZNF252	NR_023392	A_23_P412186	7.49947	7.03586	-0.463613	8.84787e-05	0.0257758
FGF7	NM_002009	A_32_P196021	7.83295	7.3678	-0.465146	0.000397553	0.0440768
TIMP2	NM_003255	A_33_P3382177	14.3845	13.9188	-0.465697	3.8909e-05	0.0158967
HSD17B11	NM_016245	A_23_P408271	9.34235	8.86618	-0.476172	0.000205022	0.0341724
CECR7	NR_015352	A_33_P3262625	7.02356	6.54389	-0.479669	0.000529976	0.0496317
GALNT1	NM_020474	A_23_P306105	7.68841	7.2041	-0.484311	0.000194842	0.0335001
PPT1	NM_000310	A_23_P62659	12.554	12.0668	-0.487136	0.000163423	0.0323964
TTL	NM_153712	A_33_P3427102	12.3939	11.9039	-0.490023	5.65608e-05	0.0190314
ENST00000366784	ENST00000366784	A_24_P119545	7.09241	6.60014	-0.492261	0.000227983	0.0348763
PLD1	NM_002662	A_33_P3320062	8.58487	8.09066	-0.494213	0.000426082	0.0456058
EEPD1	NM_030636	A_23_P333498	8.74664	8.25043	-0.496208	0.000193048	0.0335001
WDFY1	NM_020830	A_23_P502797	8.10929	7.61069	-0.498595	0.000346485	0.0410737
EIF4E	NM_001968	A_24_P349560	8.10661	7.60725	-0.499362	6.25892e-05	0.0201621
DPY19L1	NM_015283	A_23_P394448	7.47572	6.97626	-0.499458	1.39717e-05	0.0110755
RNF170	NM_030954	A_23_P146209	9.01315	8.51104	-0.502111	0.000445924	0.0467399
TMC7	NM_024847	A_23_P140928	7.57754	7.06875	-0.508785	0.000270807	0.0382809
NHLRC3	NM_001012754	A_32_P129950	8.75439	8.2443	-0.51009	3.63599e-05	0.0157072
EGLN3	NM_022073	A_33_P3256952	7.66925	7.15693	-0.512323	0.000326248	0.0409361
IMPAD1	NM_017813	A_23_P136232	8.1809	7.66036	-0.520544	3.55624e-05	0.0157072
LOC284440	NR_026956	A_33_P3251640	7.57611	7.05522	-0.520895	0.000103865	0.0269742
ITGAV	NM_002210	A_23_P50907	11.6529	11.125	-0.527841	2.15972e-05	0.0130142
TACSTD2	NM_002353	A_23_P149529	6.93538	6.40152	-0.533856	0.000452855	0.0470706
LIPA	NM_000235	A_23_P97860	13.4747	12.9336	-0.541074	0.000471705	0.0480337
CEP170	NM_014812	A_24_P36944	7.87086	7.31485	-0.556009	4.46456e-05	0.0169968
FAM69C	NM_001044369	A_32_P203404	7.06275	6.5055	-0.557254	9.24685e-05	0.0264875
GSTZ1	NM_145870	A_23_P106204	8.6191	8.05943	-0.559665	0.000494648	0.0489998
TATDN3	NM_001146171	A_33_P3249773	9.29551	8.73551	-0.559996	2.259e-07	0.00189193
DBI	NM_020548	A_33_P3244931	14.6756	14.1126	-0.563025	3.76755e-05	0.0157776
CR613654	CR613654	A_32_P840463	7.98647	7.41115	-0.575319	2.80585e-05	0.0143896
RPAIN	NM_001160266	A_24_P36097	8.72176	8.14486	-0.576901	0.000173896	0.0328763
SELT	NM_016275	A_33_P3305851	8.24144	7.66264	-0.578801	1.07155e-05	0.00977644
DNER	NM_139072	A_23_P362148	10.9604	10.3815	-0.57892	0.000349412	0.0410737
KCNJ10	NM_002241	A_24_P387875	11.5997	11.0144	-0.585261	0.000282689	0.0384478
SGSH	NM_000199	A_23_P254254	8.81183	8.22419	-0.587641	8.8183e-06	0.00923217
CXADR	NM_001338	A_24_P374943	7.87372	7.28588	-0.587834	4.68156e-05	0.0171179
IFIT3	NM_001549	A_33_P3283611	8.41093	7.81575	-0.595176	0.000276451	0.0384301
A_33_P3416414	A_33_P3416414	A_33_P3416414	8.49046	7.87956	-0.610902	0.000542195	0.0499028
PPFIA2	NM_003625	A_23_P402936	8.58153	7.95284	-0.628685	3.43375e-05	0.0157072
ASAH1	NM_177924	A_33_P3284463	12.9879	12.3495	-0.638435	0.00027942	0.0384478
DST	NM_020388	A_23_P348159	8.80017	8.14506	-0.655103	1.5507e-05	0.0115448
CD46	NM_172350	A_23_P35230	9.09423	8.41127	-0.682963	2.8348e-05	0.0143896
APH1A	NM_016022	A_23_P12329	8.71584	8.02589	-0.68995	6e-10	2.11879e-05
ATP5S	NM_001003803	A_24_P118231	9.03889	8.32959	-0.709301	6.2432e-05	0.0201621
MFSD1	NM_022736	A_23_P166677	10.3218	9.59005	-0.731719	3.52566e-05	0.0157072
FLJ41200	XM_001717062	A_33_P3266739	6.98065	6.22957	-0.751079	0.000399523	0.0440768
NAGLU	NM_000263	A_23_P26945	9.90911	9.12759	-0.781519	4.216e-07	0.0022698
MSRA	NM_012331	A_23_P61426	9.88728	9.10331	-0.783978	1.98e-07	0.00189193
KCNE1L	NM_012282	A_23_P256641	8.21576	7.36746	-0.848299	0.000120517	0.0286046
CYB5R2	NM_016229	A_23_P2181	12.1378	11.257	-0.880827	0.000110754	0.0276901
PFKFB2	NM_006212	A_33_P3300635	10.7642	9.86776	-0.896465	0.00040791	0.0440832
CYB5R2	NM_016229	A_33_P3381265	9.38612	8.45432	-0.931791	2.07243e-05	0.0130142
GLDN	NM_181789	A_24_P49199	11.3162	10.1834	-1.13285	3.75312e-05	0.0157776
OLR1	NM_002543	A_24_P124624	8.21611	7.04105	-1.17506	0.000255196	0.0374981
